# 1 **Single-cell profiling of transcriptome and histone modifications with EpiDamID**

2  
3 Franka J. Rang<sup>1,2,6</sup>, Kim L. de Luca<sup>1,2,6</sup>, Sandra S. de Vries<sup>1,2</sup>, Christian Valdes-Quezada<sup>1,2</sup>,  
4 Ellen Boele<sup>1,2</sup>, Phong D. Nguyen<sup>1</sup>, Isabel Guerreiro<sup>1,2</sup>, Yuko Sato<sup>5</sup>, Hiroshi Kimura<sup>5</sup>, Jeroen  
5 Bakkers<sup>1,3</sup>, Jop Kind<sup>1,2,4</sup>

6  
7 <sup>1</sup> Hubrecht Institute, Royal Netherlands Academy of Arts and Sciences (KNAW) and University  
8 Medical Center Utrecht, Utrecht, The Netherlands

9 <sup>2</sup> Oncode Institute, The Netherlands

10 <sup>3</sup> Department of Pediatric Cardiology, Division of Pediatrics, University Medical Center Utrecht,  
11 Utrecht, The Netherlands

12 <sup>4</sup> Department of Molecular Biology, Faculty of Science, Radboud Institute for Molecular Life  
13 Sciences, Radboud University Nijmegen, The Netherlands

14 <sup>5</sup> Cell Biology Center, Institute of Innovative Research, Tokyo Institute of Technology,  
15 Yokohama, 226-8503, Japan

16 <sup>6</sup> These authors contributed equally

## 17 18 **Abstract**

19 Recent advances in single-cell sequencing technologies have enabled simultaneous  
20 measurement of multiple cellular modalities, including various combinations of transcriptome,  
21 genome and epigenome. However, comprehensive profiling of the histone post-translational  
22 modifications that influence gene expression at single-cell resolution has remained limited.  
23 Here, we introduce EpiDamID, an experimental approach to target a diverse set of chromatin  
24 types by leveraging the binding specificities of genetically engineered proteins. By fusing Dam  
25 to single-chain variable fragment antibodies, engineered chromatin reader domains, or  
26 endogenous chromatin-binding proteins, we render the DamID technology and all its  
27 implementations compatible with the genome-wide identification of histone post-translational  
28 modifications. Importantly, this enables the joint analysis of chromatin marks and  
29 transcriptome in a variety of biological systems at the single-cell level. In this study, we use  
30 EpiDamID to profile single-cell Polycomb occupancy in mouse embryoid bodies and provide  
31 evidence for hierarchical gene regulatory networks. We further demonstrate the applicability  
32 of this method to *in vivo* systems by mapping H3K9me3 in early zebrafish embryogenesis,  
33 and detect striking heterochromatic regions specifically in the notochord. Overall, EpiDamID  
34 is a new addition to a vast existing toolbox for obtaining systematic insights into the role of  
35 chromatin states during dynamic cellular processes.

36 **Keywords**

37 histone modifications, single-cell genomics, multi-modal omics, chromatin, gene regulation,  
38 development, DamID

39

40 **Lead contact**

41 Further information and requests for resources and reagents should be directed to and will be  
42 fulfilled by the Lead Contact, Jop Kind (j.kind@hubrecht.eu).

43

44 **Introduction**

45 Histone post-translational modifications (PTMs) are an important aspect of chromatin structure  
46 and gene regulation. The addition of these chemical groups to histone tails can modulate the  
47 accessibility to the underlying DNA and form a binding platform for myriad downstream  
48 effector proteins. Amongst others, this can result in the shielding or recruitment of transcription  
49 factors (TFs) to promoters and enhancers. As such, histone PTMs play key roles in a multitude  
50 of biological processes, including lineage specification (e.g., Juan et al., 2016; Nicetto et al.,  
51 2019; Pengelly et al., 2013), cell cycle regulation (e.g., Hirota et al., 2005; W. Liu et al., 2010),  
52 and response to DNA damage (e.g., Rogakou et al., 1998; Sanders et al., 2004).

53

54 Over the past decade, antibody-based DNA-sequencing methods, such as chromatin  
55 immunoprecipitation followed by sequencing (ChIP-seq), Cleavage Under Target and Release  
56 Under Nuclease (CUT&RUN) (Skene & Henikoff, 2017), and related techniques (Schmid et  
57 al., 2004), have provided valuable insights into the function of histone PTMs in a variety of  
58 biological contexts. However, the general requirement of high numbers of input cells  
59 consequently provides a population-average view of the assayed histone PTM that belies the  
60 complexity of many biological systems. As a response, several low-input methods have been  
61 developed that can assay histone PTMs in individual cells (Ai et al., 2019; Hainer et al., 2019;  
62 Harada et al., 2019; Ku et al., 2019; Rotem et al., 2015; Zeller et al., 2021). While these single-  
63 cell methods offer a first understanding of the epigenetic heterogeneity between cells, it  
64 remains challenging to establish a direct link to other measurable outputs such as transcription  
65 or cellular state. Recently, a variety of single-cell multi-modal techniques have been developed  
66 that can simultaneously probe one or multiple aspects of gene regulation in conjunction with  
67 transcription in individual cells (Angermueller et al., 2016; Argelaguet et al., 2019; J. Cao et  
68 al., 2018; Clark et al., 2018; Moudgil et al., 2020; Rooijers et al., 2019; Xiong et al., 2021; Zhu  
69 et al., 2019, 2021). These techniques thus provide a way to link gene regulatory mechanisms  
70 to transcriptional output and cellular state in an unprecedented manner.

71

72 We recently developed scDam&T-seq, a method that can assay both transcription and DNA-  
73 protein contacts in single cells by combining single-cell DamID and CEL-Seq2 (Rooijers et al.,  
74 2019). DamID-based techniques attain specificity by tagging a protein of interest (POI) with  
75 the *E. coli* Dam methyltransferase, which will methylate adenines in a GATC motif in the  
76 proximity of the POI (Filion et al., 2010; Vogel et al., 2007). DamID is especially suited for  
77 obtaining information from individual cells, because DNA-protein contacts are recorded  
78 directly on the DNA in the living cell, and sample processing is particularly efficient with little  
79 loss of material. However, since Dam cannot be tagged directly to a post-translationally  
80 modified proteins by genetic engineering, this has precluded the use of any DamID methods  
81 for studying these epigenetic marks.

82

83 Here, we present EpiDamID, an extension of existing DamID-based protocols for the study of  
84 histone PTMs that can be applied in single cells. In EpiDamID, Dam is fused to a targeting  
85 domain with specific affinity for the histone PTM of interest. These targeting domains can be  
86 either a) full-length proteins with endogenous binding affinity, b) protein domains from known  
87 chromatin binders (Kungulovski et al., 2014, 2016; Vermeulen et al., 2007), or c) *modification-*  
88 *specific intracellular antibodies* (mintbodies) (Sato et al., 2013, 2016; Tjalsma et al., 2021)  
89 (Fig. 1A). Since this approach is an adaptation that can be applied to any DamID protocol, it  
90 provides all advantages that the DamID toolbox has to offer and makes them available to the  
91 study of chromatin modifications. This includes the possibility to perform (live) imaging of Dam-  
92 methylated DNA (Altemose et al., 2020; Borsos et al., 2019; Kind et al., 2013), tissue-specific  
93 study of model organisms without cell isolation via Targeted DamID (TaDa) (Southall et al.,  
94 2013), DamID-directed proteomics (Wong et al., 2021), multi-modal single-molecule  
95 sequencing (Cheetham et al., 2021), (multi-modal) single-cell sequencing studies (Altemose  
96 et al., 2020; Borsos et al., 2019; Kind et al., 2015; Rooijers et al., 2019), and the processing  
97 of samples with extremely little starting material (Borsos et al., 2019).

98

99 We first validated the specificity of EpiDamID by targeting many different chromatin types in  
100 populations of human RPE-1 cells. To demonstrate the potential of EpiDamID, we then  
101 implemented the previously developed scDam&T-seq method (Rooijers et al., 2019) in mouse  
102 embryonic stem cells (mESCs) and obtained high-quality single-cell histone PTM profiles for  
103 selected targeting constructs. Next, we leveraged this single-cell resolution to study the  
104 Polycomb mark H3K27me3 and its relationship to transcription in mouse embryoid bodies  
105 (EBs), an *in vitro* differentiation system that mimics aspects of embryonic development  
106 (Desbaillets et al., 2000). We identified distinct Polycomb-regulated and Polycomb-  
107 independent hierarchical TF networks covering both lineage-specific and ubiquitous functions.  
108 Finally, we developed a protocol to assay cell type-specific patterns of the heterochromatic

109 mark H3K9me3 in the zebrafish embryo and discovered broad domains of heterochromatin  
110 specific to the notochord. Together, these results show that EpiDamID provides a versatile  
111 tool that can be easily implemented in diverse biological settings to obtain histone PTM profiles  
112 of individual cells.

113

## 114 **Results**

### 115 ***Targeting domains specific to histone modifications mark distinct chromatin types with*** 116 ***EpiDamID***

117 The conventional DamID approach involves genetically engineering a POI to the bacterial  
118 methyltransferase Dam (Fig. 1A). In this study, we adapted the DamID method to detect  
119 histone PTMs by fusing Dam to one of the following: 1) full-length chromatin proteins, 2) tuples  
120 of well-characterized reader domains (Kungulovski et al., 2014, 2016; Vermeulen et al., 2007),  
121 or 3) single-chain variable fragments (scFv) also known as mintbodies (Sato et al., 2013, 2016;  
122 Tjalsma et al., 2021) (Fig. 1A). Such constructs have been previously successfully applied in  
123 microscopy, proteomics and CHIP experiments (Sato et al., 2013, 2016, 2021; Tjalsma et al.,  
124 2021; Villaseñor et al., 2020). The different constructs were categorized based on their targets  
125 into the following chromatin types: accessible, active, heterochromatin, and Polycomb. This  
126 approach is henceforth referred to as EpiDamID, and the construct fused to Dam as the  
127 targeting domain. We generated various expression constructs for each of the different  
128 targeting domains, testing promoters (HSP, PGK), orientations (Dam-POI, POI-Dam) and two  
129 versions of the Dam protein (Dam, Dam126) (Supplementary Table 1). The choice of promoter  
130 influences the expression level of the Dam-POI, whereas the orientation may affect access of  
131 the POI to its target. In the Dam126 mutant, the N126A substitution reduces its binding affinity  
132 to the DNA and consequently diminishes off-target methylation (Park et al., 2018; Szczesnik  
133 et al., 2019). We introduced the Dam constructs by viral transduction in hTERT-immortalized  
134 RPE-1 cells and performed DamID2 followed by high-throughput sequencing (Markodimitraki  
135 et al., 2020). To validate our data with an orthogonal method, we generated antibody ChIP-  
136 seq of various histone modifications.

137

138 The DamID samples were filtered on sequencing depth and information content (IC), a  
139 measure of the amount of signal in the data compared to the background genome-wide  
140 distribution of mappable fragments (Methods). IC is a valuable metric for determining overall  
141 sample quality and signal-to-noise levels (Fig. S1A-B). The IC additionally showed that tuples  
142 of reader domains fused to Dam perform better than single domains, in agreement with a  
143 recent study employing similar domains for proteomics purposes (Villaseñor et al., 2020) (Fig.  
144 S1A-B). Therefore, only data from the triple reader domains were included in further analyses.

145

146 Visualization of all filtered DamID samples by uniform manifold approximation and projection  
147 (UMAP) shows that EpiDamID mapping allows for identification of distinct chromatin types  
148 (Fig. 1B). Genome-wide DamID signal correlates well with antibody ChIP-seq signal of the  
149 same chromatin target (Fig. 1C and S1C). Importantly, DamID samples do not group based  
150 on construct type, promoter, Dam type, sequencing depth, or IC (Fig. S1D-E), indicating that  
151 those properties are separate from target specificity. To further compare DamID with ChIP-  
152 seq, we calculated enrichment over relevant genomic regions (genes or ChIP-seq  
153 peaks/domains). Cumulative signal shows excellent concordance between the methods and  
154 displays the expected patterns for all targets (Fig. 1D-F, left), as do example regions along the  
155 linear genome (Fig. 1D-F, right). It was previously reported that use of the Dam126 mutant  
156 improves signal quality compared to the use of wildtype (WT) Dam (Szczesnik et al., 2019).  
157 Indeed, we observed markedly improved sensitivity and reduced background methylation with  
158 the mutant Dam126 compared to WT Dam in our data (Fig. S1F-G).

159

160 Finally, we further validated the correct nuclear localization of Dam-marked chromatin with  
161 microscopy by immunofluorescent staining of endogenous histone PTMs and DamID  
162 visualization using <sup>m6</sup>A-Tracer protein (Kind et al., 2013; Schaik et al., 2020) (Fig. 1G).

163

164 Together, these results show that EpiDamID specifically targets histone PTMs and enables  
165 identification of their genomic distributions by next-generation sequencing.

166

### 167 ***Detection of histone PTMs in single mouse embryonic stem cells with EpiDamID***

168 We next sought to establish whether the EpiDamID approach could be used to achieve single-  
169 cell profiles. To this end, we generated clonal, inducible mESC lines for each of the following  
170 targeting domains fused to Dam: H4K20me1 mintbody, H3K27me3 mintbody, and the  
171 H3K27me3-specific CBX7 protein domain (3x tuple). While H4K20me1 is enriched over the  
172 gene body of active genes (Shoaib et al., 2021), the heterochromatic mark H3K27me3 is  
173 enriched over the promoter of developmentally regulated genes until the appropriate moment  
174 of their activation during differentiation (Boyer et al., 2006; Riising et al., 2014). As controls,  
175 we included an H3K27me3<sup>mut</sup> mintbody construct whose antigen-binding ability is abrogated  
176 via a point mutation in the third complementarity determining region of the heavy chain (Tyr105  
177 to Phe), and a published mESC line expressing untethered Dam (Rooijers et al., 2019). Using  
178 these cell lines, we followed the scDam&T-seq protocol to generate 442 to 1,402 single-cell  
179 samples per construct. After filtering on the number of unique GATCs and IC, we retained 283  
180 to 855 samples with high-quality DamID signal (Fig S2A-C). For the subsequent analyses, we  
181 also included a published dataset of Dam fused to RING1B (Rooijers et al., 2019) as an  
182 example of a full-length chromatin reader targeting Polycomb chromatin with DamID. All of

183 these constructs contained the WT Dam, as we found that the reduced activity of Dam126  
184 was insufficient to produce high-quality single-cell signal (data not shown).

185

186 Dimensionality reduction on the resulting single-cell datasets revealed that the samples  
187 primarily separated based on chromatin type (Fig. 2A), indicating that the various targeting  
188 domains result in specific methylation. To further confirm the specificity of the constructs, we  
189 used mESC H3K27me3 (ENCSR059MBO) and H3K9ac (ENCSR000CGP) ChIP-seq  
190 datasets from the ENCODE portal (Davis et al., 2018) and generated our own mESC  
191 H4K20me1 ChIP-seq dataset. For all single cells, we computed the enrichment of single-cell  
192 counts within H3K27me3, H3K9ac and H4K20me1 ChIP-seq domains. These results show a  
193 strong enrichment of EpiDamID counts within domains for the corresponding histone PTMs  
194 (Fig. 2B-D), indicating that the methylation patterns are specific for their respective chromatin  
195 targets, even at the single-cell level. We further validated the approach by combining single-  
196 cell samples per construct to obtain *in silico* population data, and computed the enrichment  
197 over H3K27me3 ChIP-seq domains (Fig. 2E) and active gene bodies (Fig. 2F) for the  
198 Polycomb-targeting constructs and H4K20me1, respectively. This illustrates that the  
199 combined signal, as well as the signal of the best single-cell samples, is strongly enriched  
200 over genomic regions of the corresponding histone PTM. Contrary to the H3K27me3  
201 construct, its mutated mintbody control, H3K27me3<sup>mut</sup>, shows little enrichment over  
202 H3K27me3 ChIP-seq domains (Fig. 2B and Fig. S2D) further corroborating the specificity of  
203 the EpiDamID approach. Besides the average enrichment patterns, the specificity of the signal  
204 is also observed at individual loci in both the *in silico* populations and single cells (Fig. 2G-H  
205 and Fig. S2E).

206

207 These results collectively demonstrate that both mintbodies and protein domains can be used  
208 to map histone PTMs in single cells with the EpiDamID approach.

209

### 210 ***Joint profiling of Polycomb chromatin and gene expression in mouse embryoid bodies***

211 To exploit the benefits of simultaneously measuring histone PTMs and transcriptome, and to  
212 test the potential of the method to capture chromatin dynamics, we chose to profile Polycomb  
213 in mouse EBs. We targeted the two main Polycomb repressive complexes (PRC) with  
214 EpiDamID using the full-length protein RING1B and H3K27me3-mintbody fused to Dam.  
215 RING1B is a core PRC1 protein that mediates H2AK119 ubiquitylation (de Napoles et al.,  
216 2004; H. Wang et al., 2004), and H3K27me3 is the histone PTM deposited by PRC2 (R. Cao  
217 et al., 2002; Czermin et al., 2002; Kuzmichev et al., 2002; Müller et al., 2002). Both PRC1 and  
218 PRC2 have key roles in gene regulation during stem cell differentiation and early embryonic

219 development (see (Piunti & Shilatifard, 2021) and (Blackledge & Klose, 2021) for recent  
220 reviews on this topic).

221

222 To assay a diversity of cell types at different time points, we harvested EBs for scDam&T-seq  
223 at day 7, 10 and 14 post aggregation, next to ESCs grown in 2i/LIF (Fig. 3A). In addition to  
224 RING1B and H3K27me3-mintbody, we included the untethered Dam protein for all time points  
225 as a control for chromatin accessibility. Collectively, we obtained 2,943 cells that passed both  
226 DamID and transcriptome thresholds (Fig. S3A). Based on the transcriptional readout, we  
227 identified eight distinct clusters across all time points (Fig. 3B). We next integrated the EB  
228 transcriptome data with the publicly available mouse embryo atlas (Pijuan-Sala et al., 2019)  
229 to confirm the correspondence of the EB cell types with early mouse development, and guide  
230 cluster annotations (Fig. S3B-C). The results indicated the presence of both pluripotent and  
231 more differentiated cellular states, including epiblast, endoderm, and mesoderm lineages.  
232 Notably, the DamID readout alone was sufficient to consistently separate cells on chromatin  
233 type (Fig. 3C) and to distinguish between the pluripotent and more lineage-committed cells  
234 (Fig. 3D-E). Thus, the chromatin profiles in individual cells display cell type-specific patterns  
235 of chromatin accessibility and Polycomb association. Prompted by this observation, we trained  
236 a linear discriminant analysis (LDA) classifier to assign an additional 1,543 cells with poor  
237 transcriptional data to cell type clusters, based on their DamID signal (Fig. S3D-E).

238

239 We next sought to define the set of genes that is Polycomb-regulated in the EB system. First,  
240 we determined the H3K27me3 and RING1B signal at the promoter region of all genes  
241 (Methods) and compared these two readouts across the clusters. This confirmed good  
242 correspondence between H3K27me3 and RING1B profiles (Fig. S3F-G), albeit with a slightly  
243 higher signal amplitude for RING1B (Fig. S3G). This difference between RING1B and  
244 H3K27me3 may be biological (e.g., differential binding sites or kinetics) and/or technical (e.g.,  
245 the use of a full-length protein versus a mintbody to target Dam). Nonetheless, because of the  
246 overall similarity between the two profiles, we decided to classify high-confidence Polycomb  
247 targets as having both H3K27me3 and RING1B enrichment in at least one of the EB clusters  
248 (excluding cluster 7 due to the relatively low number of cells) or in the previous ESC data set  
249 (Methods). We identified 9,159 Polycomb-regulated targets across the entire dataset, in good  
250 concordance with a previous study in mouse development (Gorkin et al., 2020) (Fig. S3H).  
251 These results validate the quality of the EpiDamID data and underscore the potential of the  
252 method to derive cell type-specific chromatin profiles from complex tissues.

253

254 Next, we intersected the cluster-specific transcriptome and DamID data to relate gene  
255 expression patterns to Polycomb associations. Based on the known role of Polycomb in gene

256 silencing, differential binding of PRC1/2 to genes is expected to be associated with changes  
257 in expression levels of these genes. As exemplified in [Fig. 3F-G](#), the cell type-specific  
258 expression of *Tal1*, a master regulator in hematopoiesis, in cluster 6 is indeed associated with  
259 an absence of H3K37me3 and RING1B exclusively in this cluster, whereas strong Polycomb  
260 occupancy over the *Tal1* promoter is evident in all other clusters. For presentation purposes,  
261 we display only the most prominent pluripotent cluster (3) and omit the other pluripotent  
262 clusters (2, 5, and 7), which had very similar characteristics. The negative association of  
263 Polycomb binding with gene expression is apparent for all PRC targets that are upregulated  
264 in the hematopoietic cluster ([Fig. S3I-J](#)). In addition, unsupervised clustering of H3K27me3  
265 and RING1B promoter occupancy across cell clusters shows variation in signal between target  
266 genes as well as between cell types, indicating dynamic regulation of these targets within the  
267 EB system ([Fig. 3H](#)). Moreover, the subset of Polycomb targets that shows variable PRC  
268 occupancy is typically more highly expressed in the clusters where Polycomb is absent ([Fig.](#)  
269 [3I](#)). Collectively, these data illustrate the strength of the EpiDamID approach to capture  
270 transcription and chromatin dynamics during differentiation in a single integrated method.

271

### 272 ***Polycomb-regulated transcription factors form separate regulatory networks***

273 After confirming the validity of the EpiDamID approach in measuring Polycomb dynamics  
274 during differentiation, we next focused on the Polycomb targets based on their function. We  
275 found that TF genes are over-represented within the Polycomb target genes ([Fig. S4A](#)), in line  
276 with previous observations (Boyer et al., 2006). Nearly half of all TF genes in the genome  
277 (761/1689) is bound by Polycomb in at least one cluster. In addition, genes encoding TFs  
278 generally accumulate higher levels of H3K27me3 and RING1B compared to other protein-  
279 coding genes ([Fig. S4B](#)). In line with an important role in lineage specification, Polycomb-  
280 controlled TFs are expressed in a cell type-specific pattern, as opposed to the more  
281 constitutive expression across cell types for Polycomb-independent TFs ([Fig. S4C-D](#)).  
282 Accordingly, the Polycomb-controlled TFs are enriched for Gene Ontology (GO) terms  
283 associated with animal development ([Fig. S4E](#)).

284

285 The enriched Polycomb targeting of developmentally regulated TF genes inspired us to further  
286 investigate the role of Polycomb in TF network hierarchies. We used SCENIC to systematically  
287 identify target genes that are associated with the expression of TFs (Aibar et al., 2017; van de  
288 Sande et al., 2020). SCENIC employs co-expression patterns as well as binding motifs to link  
289 TFs to their targets, together henceforth termed “regulons” (per SCENIC nomenclature). We  
290 identified 285 “activating” regulons after filtering ([Fig. 4A](#) and [Methods](#)). Notably, while  
291 regulons and their activity were found independently of RNA-based cluster annotations, we



292 observed excellent recapitulation of cluster-specific transcriptional networks, confirming that  
293 SCENIC-identified regulon activity holds information on cellular identity (Fig. 4A).

294

295 Based on the expression modules identified with SCENIC, we first sought to determine how  
296 overall regulon activity correlates to Polycomb binding. As illustrated for the homeobox TF  
297 gene *Msx1*, we found that regulon activity is generally anti-correlated with Polycomb  
298 association of both the TF gene (red dot) and its Polycomb-controlled target genes (boxplots,  
299 65% of all MSX1 targets) (Fig. 4B-C). We wondered whether there is a general preference for  
300 Polycomb-controlled TFs to target genes that themselves are regulated by Polycomb. This is  
301 indeed the case: while Polycomb-controlled TFs have a similar number of target genes  
302 compared to other TFs (Fig. S4F), the expression of the targets is much more frequently  
303 controlled by Polycomb than would be expected by chance (Fig. 4D). This effect is even  
304 stronger when considering the subset of targets that is exclusively regulated by Polycomb TFs  
305 (Fig. S4G). Using the transcriptional network provided by SCENIC, we also identified  
306 upstream TFs that control the expression of the regulon TFs (Fig. 4E). Similar to the target  
307 genes, the regulators of Polycomb-controlled TFs also tend to be Polycomb-controlled (Fig.  
308 4F). Moreover, the fractions of Polycomb-controlled upstream regulators and downstream  
309 targets are correlated (Fig. 4G), indicating consistency in the level of Polycomb regulation  
310 across at least three layers of the TF network. Since Polycomb plays an important role in cell  
311 type specification, we evaluated whether this strict Polycomb control in the network was  
312 exclusive to lineage-specific genes. By clustering TFs into lineage-specific and unspecific  
313 groups based on their expression pattern (Fig. S4H), we found that, while this trend was  
314 especially strong for the lineage-specific genes, the consistency of Polycomb regulation in the  
315 network was a feature for other, unspecific, genes as well (Fig. S4I). These results suggest  
316 that Polycomb-associated hierarchies exist, forming relatively separate networks isolated from  
317 other gene regulatory mechanisms, and that this phenomenon extends beyond lineage-  
318 specific genes alone.

319

320 Together, the above findings demonstrate that single-cell EpiDamID can be successfully  
321 applied in complex developmental systems to gather detailed information on cell type-specific  
322 Polycomb regulation and its interaction with transcriptional networks.

323

### 324 ***Implementation of EpiDamID during zebrafish embryogenesis***

325 As presented above, DamID is a method that requires insertion of the Dam fusion protein into  
326 the biological system of interest. Genetic engineering of cell lines offers the advantage of many  
327 powerful *in vitro* differentiation systems, exemplified by our work in EBs. Contrastingly, it has  
328 proven challenging to apply DamID as a tool to study embryogenesis in transgenic vertebrate

329 model organisms. To overcome this limitation, we previously established a protocol that  
330 introduces DamID into mouse preimplantation embryos via microinjections in the zygote  
331 (Borsos et al., 2019; Pal et al., 2021). Here, we sought to implement a similar strategy to apply  
332 EpiDamID during zebrafish development.

333

334 To establish the system, we profiled heterochromatin marked by H3K9me3 in single cells.  
335 H3K9me3 is reprogrammed during the early stages of development in several species (Laue  
336 et al., 2019; Mutlu et al., 2018; Rudolph et al., 2007; Santos et al., 2005; C. Wang et al., 2018)  
337 and the deposition of this mark coincides with decreased developmental potential (Ahmed et  
338 al., 2010). It was previously shown in zebrafish that H3K9me3 is largely absent before the  
339 maternal-to-zygotic transition (MZT) due to the presence of maternal *smarca2* mRNA. Upon  
340 zygotic transcription, degradation of *smarca2* results in a gradual increase of H3K9me3 from  
341 MZT up to shield stage [6 hours post-fertilization (hpf)] (Laue et al., 2019). However, it remains  
342 unclear whether the H3K9me3 distribution undergoes further remodeling after this stage, and  
343 whether its establishment differs across cell types during development.

344

345 To address these questions and to test EpiDamID in a zebrafish developmental context, we  
346 used the MPHOSPH8 chromodomain targeting H3K9me3 (Kungulovski et al., 2014), which  
347 we validated for EpiDamID in RPE-1 cells (Fig. 1B, F). We injected *Dam-Mphosph8* mRNA  
348 into the yolk at 1-cell stage (Fig. 5A) and optimized the mRNA concentrations to obtain  
349 scDam&T-seq data of high quality (data not shown). We separately injected *Dam-Mphosph8*  
350 to profile H3K9me3, and untethered *Dam* to profile chromatin accessibility. Embryos were  
351 collected at the 15-somite stage, which comprises a wide diversity of cell types corresponding  
352 to all germ layers. We generated 2,127 single-cell samples passing both DamID and CEL-  
353 Seq2 thresholds (Methods). To validate the specificity of the obtained H3K9me3 signal, we  
354 combined the DamID data of all cells in an *in silico* whole-embryo sample and compared this  
355 to the published H3K9me3 ChIP-seq data of 6-hpf embryos (Laue et al., 2019), which showed  
356 good concordance (Fig. S5.1A). These data confirm that we have established an orthogonal  
357 non-transgenic approach to generate high-resolution genome-wide profiles of  
358 heterochromatin during zebrafish development.

359

### 360 ***Broad domains of notochord-specific H3K9me3 enrichment revealed by scDam&T-seq***

361 Analysis of the single-cell transcriptome data resulted in 22 clusters of diverse cell types (Fig.  
362 5B), which we annotated according to expression of known marker genes (Fig. S5.1B). We  
363 performed dimensionality reduction based on the DamID signal and observed a clear  
364 separation of cells according to their Dam construct, and to a lesser extent on their cell type  
365 (Fig. 5C-D). As described for EpiDamID in EBs, cluster-specific DamID profiles allowed us to

366 employ the LDA classifier to recover a further 705 cells (Fig. S5.2C). Notably, the MPHOSPH8  
367 samples of hatching gland (cluster 1, *he1.1* expression) and notochord (cluster 2, *col9a2*  
368 expression) segregated strongly from the other cell types (Fig. 5D), implying differences in  
369 their single-cell H3K9me3 profiles. Subsequently, we combined all single-cell DamID data per  
370 cluster to obtain cell type-specific H3K9me3 patterns (Fig. 5E). We observed clear differences  
371 in the genomic profiles, most notably the appearance of large domains of H3K9me3  
372 enrichment in the notochord, and overall lower levels of H3K9me3 in the hatching gland (Fig.  
373 5E and Fig. S5.1D). These differences are largely consistent between individual cells (Fig. 5E,  
374 heatmaps). In conclusion, with EpiDamID we are able to capture cell type-specific epigenetic  
375 profiles for individual cells of the 15-somite zebrafish embryo.

376

377 Next, to more systematically identify and characterize regions of differential H3K9me3  
378 enrichment between cell clusters, we performed ChromHMM (Ernst & Kellis, 2012, 2017)  
379 (Methods). The approach uses the H3K9me3 signal per cluster to annotate genomic segments  
380 as belonging to different H3K9me3 “states” characterized by the clusters in which the segment  
381 is enriched. We included the 12 cell clusters with sufficient cells (containing >30 cells per  
382 construct) and identified five H3K9me3 states across the genome. These represented: A)  
383 three states of constitutive H3K9me3 with different enrichment levels [A1-A3], B) notochord-  
384 specific H3K9me3 enrichment, and C) constitutive depletion of H3K9me3 (Fig. 5F-G). State A  
385 (A1-3) chromatin forms broad domains (Fig. S5.1E) that together comprise 27% of the  
386 genome (Fig. S5.1F) and, as expected for H3K9me3-associated chromatin regions, are  
387 characterized by sparser gene density and lower gene activity compared to the H3K9me3-  
388 depleted state C (Fig. 5H). Moreover, state A1 is strongly enriched for zinc-finger transcription  
389 factors (Fig. S5.1G), which are known to be demarcated by H3K9me3 in other species (Hahn  
390 et al., 2011). The notochord-specific state B has similar characteristics to states A1-A3 (Fig.  
391 5H, S5.1E-F), yet exhibits broader consecutive regions of H3K9me3 enrichment (Fig. 5G and  
392 S5.1E) and an even lower active gene density (Fig. 5H). Despite the size of the notochord-  
393 specific H3K9me3 domains and their features typical of repressive chromatin, we could not  
394 relate them back to differences in tissue-specific gene expression (Fig. S5.1H).

395

396 One of the known functions of H3K9me3 chromatin is the repression of transposable elements  
397 (Bulut-Karslioglu et al., 2014; S. Liu et al., 2014; Mosch et al., 2011). Indeed, it was previously  
398 observed in zebrafish that nearly all H3K9me3 domains in early embryos are associated with  
399 repeats (Laue et al., 2019). We therefore determined whether distinct repeat classes were  
400 over-represented in each H3K9me3 ChromHMM state (Fig. S5.2A). This analysis revealed a  
401 strong enrichment of several repeat classes in state A1, including LTR and tRNA. To further  
402 discriminate within the classes, we looked into all repeat types with at least 100 genomic

403 copies. In addition to the most prominent enrichment of LTR repeats, state A1 showed a high  
404 frequency of pericentromeric satellite repeats SAT-1 and BRSATI (Fig. 5I), in line with the  
405 known occupancy of H3K9me3 at pericentromeric regions in diverse species. We postulated  
406 that the enrichment of repeats found within state A1, as opposed to A2 and A3, could be due  
407 to elevated signal at these loci, as a result of active targeting for H3K9me3- mediated  
408 silencing. Inspection of the DamID patterns indeed showed a clear increase of signal centered  
409 on specific repeat regions in state A1, and to lesser extents in other states (Fig. S5.2B). In  
410 addition, we investigated whether there are repeats strongly enriched within the notochord-  
411 specific state B domains that could potentially explain the existence of these domains. We  
412 found that there are indeed certain repeats specifically enriched within state B (Fig. 5I and Fig.  
413 S5.2C), albeit rarely as conspicuous as the enrichments observed in state A1. It therefore  
414 warrants further study to see whether H3K9me3 is involved in cell type-specific repression of  
415 repetitive genomic regions in notochord.

416

#### 417 ***Altered expression of chromatin proteins and pronounced nuclear*** 418 ***compartmentalization in notochord***

419 Finally, we took advantage of the combined measurements of transcriptome and epigenetic  
420 profiles to gain insight into cluster-specific expression of known chromatin proteins in relation  
421 to the differential H3K9me3 patterns. We inspected the expression of histone  
422 methyltransferases, demethylases and other chromatin factors across clusters, and did not  
423 detect an upregulation of known H3K9 methyltransferases (*setdb2*, *setdb1a/b*, *suv39h11a/b*,  
424 *ehmt2*) nor demethylases (*kdm4aa/ab/b/c*, *phf8*) in notochord (Fig. S5.2D). Of note, however,  
425 the H3K9- and H3K36-specific demethylase *kdm4c* was exclusively upregulated in hatching  
426 gland, which could explain the low H3K9me3 levels in this cluster. Moreover, among genes  
427 significantly upregulated in notochord, *Imna* stood out. This gene encodes the nuclear lamina  
428 protein Lamin A/C that is known to associate with heterochromatin (Gruenbaum & Foisner,  
429 2015) and plays an important structural role in the nucleus (Donnalaja et al., 2020; Gruenbaum  
430 & Foisner, 2015), further suggesting an altered chromatin state in the notochord.

431

432 To directly investigate chromatin state and nuclear organization in these embryos, we  
433 performed confocal imaging of H3K9me3 and DAPI stainings in notochord, brain, and skeletal  
434 muscle. H3K9me3-marked chromatin displayed a typical nuclear distribution in all tissues,  
435 including heterochromatin foci as previously reported (Laue et al., 2019) (Fig. S5.2E). Notably,  
436 the DAPI staining showed markedly more structure in the notochord compared to the other  
437 tissues (Fig. 5J), visible as a clear rim along the nuclear periphery and denser foci within the  
438 nuclear interior. Since DAPI is indicative of AT-rich and generally less accessible DNA, this  
439 suggests a stronger separation between euchromatin and heterochromatin. Together with our

440 findings of notochord-specific H3K9me3 domains and differential expression of chromatin  
441 factors, these observations on nuclear organization warrant further study of their contribution  
442 to the structural properties of notochord cells.

443

444 Collectively, the implementation of EpiDamID in zebrafish embryos shows that this strategy  
445 provides a flexible and accessible approach to generate rich single-cell information on the  
446 epigenetic states that underlie biological processes during zebrafish embryogenesis.

447

## 448 **Discussion**

449 Here, we have developed and tested EpiDamID, an adaptation of conventional DamID that  
450 extends its application of profiling DNA-protein contacts to epigenetic marks. EpiDamID  
451 utilizes the binding specificities of genetically encoded mintbodies (Sato et al., 2013, 2016;  
452 Tjalsma et al., 2021), histone PTM-identifying domains (Kungulovski et al., 2014, 2016;  
453 Vermeulen et al., 2007), or full-length chromatin readers to target Dam to specific chromatin  
454 marks. We presented a wide diversity of histone PTM patterns generated after viral  
455 transduction of EpiDamID constructs in RPE-1 cells, and validated the approach through  
456 comparison to genomic profiles generated with ChIP-seq (Fig. 1). A selection of histone PTMs  
457 was chosen to illustrate that EpiDamID yields high-quality single-cell profiles in engineered  
458 mESC lines (Fig. 2), which was further demonstrated by its implementation in an EB  
459 differentiation system (Fig. 3 and 4). Lastly, we showed that single-cell histone PTM profiling  
460 can be achieved in zebrafish embryos (Fig. 5). Joint single-cell quantifications of histone PTMs  
461 and transcriptome enabled the identification of cell types and associated histone PTM profiles  
462 in integrated experiments.

463

### 464 ***Advantages of DamID for studying histone PTMs during embryogenesis***

465 Since DamID was first developed (Vogel et al., 2007), a wide range of derivative technologies  
466 have been established (see (Aughey et al., 2019)). This includes the possibility to perform  
467 live-cell imaging of DamID-marked chromatin regions (Altemose et al., 2020; Borsos et al.,  
468 2019; Kind et al., 2013), targeted DamID (TaDa) for tissue-specific profiling without cell  
469 isolation or dissection (Marshall & Brand, 2017; Southall et al., 2013), proteomics on DamID-  
470 marked genomic regions (Wong et al., 2021), single-cell experiments (Altemose et al., 2020;  
471 Borsos et al., 2019; Kind et al., 2015; Rooijers et al., 2019), and protocols for performing  
472 DamID in living mouse preimplantation embryos (Borsos et al., 2019; Pal et al., 2021).  
473 Moreover, DamID has been successfully established in many model systems including various  
474 mouse and human cell lines and several organisms, including plants, fish, fly and worms  
475 (Aughey et al., 2019). EpiDamID can be implemented in any DamID-based protocol, thereby  
476 offering the possibility to obtain live-cell microscopic, proteomic and genomic measurements

477 of histone PTMs in a single integrated toolbox in diverse biological settings. (Kind et al., 2013;  
478 Park et al., 2019).

479

480 The variety of implementations and model systems makes EpiDamID especially suitable to  
481 study histone PTMs in development. The single-cell implementations of DamID—scDamID  
482 and scDam&T-seq—require little sample handling and few enzymatic steps, resulting in  
483 minimal sample loss. This makes them particularly efficient and, as a result, offers the  
484 possibility to individually collect and process all cells belonging to the same tissue (Borsos et  
485 al., 2019). For example, scDam&T-seq with EpiDamID constructs could be used to individually  
486 collect all cells of a single preimplantation mouse embryo and examine epigenetic and  
487 transcriptomic differences that may point towards cell fate commitment. In contrast, state-of-  
488 the-art methods require extensive tissue handling prior to signal amplification, preventing  
489 capture and tracking of intra-embryonic variability. Furthermore, the DamID genomic marks  
490 are stable upon deposition, offering the interesting possibility to track ancestral EpiDamID  
491 genomic signatures through mitosis to study inheritance and spatial distribution of epigenetic  
492 states in daughter cells (Kind et al., 2013; Park et al., 2019). This feature adds a temporal axis  
493 to genomic experiments, albeit only for a single cell division due to the dilution of the <sup>m6</sup>A-print  
494 upon DNA replication. This unique aspect of DamID warrants further exploration, especially in  
495 single-cell multimodal omics experiments.

496

#### 497 ***DamID as an integrative method for single-cell multi-modal omics***

498 The DamID workflow is suitable for integration with other single-cell protocols to achieve multi-  
499 modal measurements (Markodimitraki et al., 2020). The limited handling prior to individual cell  
500 capture offers opportunities to integrate upstream steps of other protocols that are compatible  
501 with the final processing steps of scDamID. Powerful future method integrations may involve  
502 combining scDamID with scChIC-seq (Ku et al., 2019) or sortChIC (Zeller et al., 2021) to  
503 measure two genome-wide profiles in the same cell, or the incorporation of the CITE-seq  
504 approach to obtain quantitative single-cell measurements of protein abundance,  
505 transcriptomics and histone PTM profiles. This latter combination offers the exciting prospect  
506 to study gene expression across the central dogma of gene regulation.

507

#### 508 ***Chromatin-associated gene regulatory networks in mouse developmental systems***

509 We implemented EpiDamID in EB cultures to investigate the PRC2-deposited H3K27me3  
510 mark alongside the binding of core PRC1 component RING1B, and the role of Polycomb in  
511 transcriptional regulation during differentiation. We observed extensive variability in Polycomb  
512 occupancy across distinct cell types, and, in addition, identified the existence of hierarchical  
513 Polycomb-associated regulatory networks. We speculate that these Polycomb-controlled

514 networks ensure robustness of stable maintenance of repression. By establishing the  
515 EpiDamID approach, we have set the stage for similar experiments in more dynamic biological  
516 systems, such as gastruloid cultures or *in vivo* mouse experiments. EpiDamID can be  
517 performed via mRNA injection to study early development as we have demonstrated here and  
518 previously (Borsos et al., 2019; Pal et al., 2021), or via the establishment of transgenic animals  
519 that conditionally express EpiDamID constructs.

520

### 521 ***Structural function of notochord during zebrafish embryogenesis may be supported by*** 522 ***heterochromatin organization in the nucleus***

523 Lastly, we established a protocol to apply EpiDamID in zebrafish embryos. We identified broad  
524 regions of notochord-specific H3K9me3 enrichment with no evident function in cell-type  
525 specific gene silencing. The notochord is an important embryonic structure that serves a  
526 mechanical as well as a cellular signalling function to its surrounding tissues (Corallo et al.,  
527 2015). During embryogenesis, notochord cells develop a large vacuole, in which high osmotic  
528 pressure forces the tissue into its characteristic stack-of-coins appearance, and provides  
529 unique mechanical properties essential for the elongation of the embryo. We hypothesize that  
530 notochord-specific domains of H3K9me3 enrichment identified in our study may contribute to  
531 the unique structural properties of these cells, potentially to withstand the strong osmotic  
532 forces acting upon the nucleus. Since H3K9me3 is known to convey nuclear stiffness [Click or](#)  
533 [tap here to enter text.](#) broad domains of consecutive heterochromatin would be beneficial.  
534 Additional support for this possibility is provided by our observation of consistently increased  
535 mRNA levels of the *Imna* gene, encoding Lamin A/C, in notochord cells. Lamin A/C is a  
536 constituent of the nuclear lamina (NL), a filamentous network lining the inner nuclear  
537 membrane (Gruenbaum & Foisner, 2015) that is directly connected to the cytoskeleton via  
538 transmembrane proteins in the LINC complex (Crisp et al., 2006). Of note, the A-type Lamins  
539 are specifically responsible for modulating nuclear structure and rigidity (Donnaloja et al.,  
540 2020). Finally, the existence of an altered chromatin state in notochord is further supported by  
541 the observation that DAPI-stained DNA forms more clearly segregated structures in notochord  
542 cells compared to other cell types, implying a stronger separation between euchromatin and  
543 heterochromatin. These findings warrant further investigation into the nature of notochord  
544 heterochromatin and its role in supporting the structural properties of this tissue.

545

### 546 ***Limitations***

547 The limitations of EpiDamID are similar to those of DamID in general. In order to generate  
548 histone PTM profiles with EpiDamID, a construct encoding for the Dam-fusion protein needs  
549 to be expressed in the system of interest. This may involve a substantial time investment  
550 depending on the system of choice. Then, to achieve optimal signal over noise, the conditions

551 to be optimized generally differ dependent on the properties of the Dam-fusion protein. For  
552 cell lines, it typically involves establishing a conditional expression system and performing a  
553 number of experiments to test for optimal induction times. For microinjection experiments, it  
554 requires optimizing mRNA concentrations that are injected in the zygote. The optimal mRNA  
555 concentration to achieve best signal-to-noise ratio depends on the histone PTM of interest  
556 and the developmental stage of choice. Finally, due to the *in vivo* expression and consequent  
557 roaming of the Dam-POI in the nucleus, spurious methylation gradually accumulates in  
558 unspecific, mostly accessible, chromatin regions. The degree of accumulated background  
559 signal differs substantially between different Dam-POIs, yet interferes most with proteins that  
560 reside within active chromatin. This can be overcome either computationally through  
561 normalization to the untethered Dam protein or the implementation of Dam mutants with  
562 decreased affinity for DNA. Unfortunately, we found that the reduced enzymatic activity of  
563 these mutants (Dam126 and others, data not shown) results in insufficient <sup>m6</sup>A-events for high-  
564 quality single-cell profiling. Further adaptation of the Dam protein to achieve an enzyme with  
565 combined full enzymatic activity and reduced DNA-binding affinity may further improve the  
566 quality of EpiDamID profiles in single cells.

567

568 We expect that the study of chromatin associations in the context of dynamic cellular states  
569 will provide better understanding of the occurrence and identity of the events that shape  
570 chromatin-regulated gene expression, as well as functions outside of transcription.

571

572

### 573 **Materials availability**

574 Unique material generated in this study is available from the Lead Contact with a completed  
575 Materials Transfer Agreement.

576

### 577 **Data and code availability**

578 All data generated in this manuscript is deposited on the NCBI Gene Expression Omnibus  
579 (GEO) portal under accession number GSE184032. All custom code is available from the  
580 corresponding author (JK) upon request.

581

### 582 **Acknowledgements**

583 We would like to thank the members of the Kind laboratory for their critical reading of the  
584 manuscript and helpful comments and suggestions. In particular, we thank Koos Rooijers for  
585 providing input and support on the computational work. This work was funded by an ERC  
586 Starting grant (ERC-StG 678423-EpiID) to JK. The Oncode Institute is partially funded by the  
587 KWF Dutch Cancer Society. IG is supported by an EMBO Long-Term Fellowship ALTF1214-



588 2016 , Swiss National Science Fund grant P400PB\_186758 and NWO-ZonMW Veni grant  
589 VI.Veni.202.073. PDN is supported by an EMBO Long-Term Fellowship ALTF1129-2015,  
590 HFSPo Fellowship (LT001404/2017-L) and an NWO-ZonMW Veni grant (016.186.017-3).  
591 The laboratory of JB is supported by the Netherlands Cardiovascular Research Initiative: An  
592 initiative with support of the Dutch Heart Foundation and Hartekind, CVON2019-002  
593 OUTREACH. The laboratory of HK is supported by MEXT/JSPS KAKENHI (JP18H05527,  
594 JP20K06484, and JP21H04764), and Japan Science and Technology Agency  
595 (JPMJCR16G1 and JPMJCR20S6). We additionally thank the Hubrecht Sorting Facility, the  
596 Hubrecht Imaging Center, and the Utrecht Sequencing Facility (USEQ) subsidized by the  
597 University Medical Center Utrecht.

598

### 599 **Author contributions**

600 FJR, KLdL, SSdV and JK conceived and designed the study. FJR, KLdL and JK wrote the  
601 manuscript. FJR performed all computational analyses. KLdL and SSdV performed all  
602 experiments unless noted otherwise. CVQ and EB designed and generated knock-in mouse  
603 ESC lines. PDN performed all zebrafish experiments, with assistance from IG and SSdV, and  
604 supervised by JB. YS and HK generated materials. All authors discussed the results and  
605 contributed to the final manuscript.

606

### 607 **Declaration of interest**

608 The authors declare no competing interests.

609 **Figure legends**

610

611 **Figure 1. Targeting domains specific to histone modifications mark distinct chromatin**  
612 **types with EpiDamID**

613 **A**, Schematic overview of EpiDamID concept compared to conventional DamID.

614 **B**, UMAP of DamID samples, colored by targeting construct. The abbreviations MB, PD and  
615 F indicate what type of EpiDamID construct is used. MB: mintbody; PD: protein domain; F: full  
616 protein.

617 **C**, UMAPs as in A, colored by correlation with selected ChIP-seq samples.

618 **D-F**, Left, average DamID and ChIP-seq enrichment plots over genomic regions of interest.  
619 Signal (log<sub>2</sub>OE) is normalized for untethered Dam or input, respectively. Regions are gene  
620 bodies for H3K9ac and H4K20me1 (**D**), and ChIP-seq domains for H3K9me3 (**E**) and  
621 H3K27me3 (**F**).

622 **D-F**, Right, genome browser view of ChIP-seq and DamID enrichment (log<sub>2</sub>OE)  
623 corresponding to left panels. The data shown in D-F represents the combined data of all  
624 samples of each targeting domain.

625 **G**, Confocal images of nuclear chromatin showing DAPI, immunofluorescent staining against  
626 an endogenous histone modification, and its corresponding EpiDamID construct visualized  
627 with m6A-Tracer. Top: H3K9ac, bottom: H3K9me3.

628

629 **Figure 2: Detection of histone PTMs in single mouse embryonic stem cells with**  
630 **EpiDamID**

631 **A**, UMAP based on the single-cell DamID readout of all single-cell samples. Samples are  
632 colored according to the targeting domain. The abbreviations MB, PD and F indicate what type  
633 of EpiDamID construct is used. MB: mintbody; PD: protein domain; F: full protein.

634 **B-D**, DamID UMAP as in A, colored by the enrichment of counts within H3K27me3 ChIP-seq  
635 domains (B), H3K9ac ChIP-seq peaks (C), and H4K20me1 ChIP-seq domains (D). Count  
636 enrichment was computed as the fraction of GATC counts that fell within the regions, relative  
637 to the total fraction of genomic GATC positions inside these domains.

638 **E**, Average signal over H3K27me3 ChIP-seq domains of CBX7 and H3K27me3 targeting  
639 domains and full-length RINGB1B protein.

640 **F**, Average signal over the TSS of the top quartile active genes (as measured by H3K9ac  
641 ChIP-seq signal) of the H4K20me1 targeting domain.

642 **E-F**, Top: *in silico* populations normalized for Dam; Bottom: five of the best single-cell samples  
643 (bottom) normalized only by read depth.

644 **G-H**, Signal of various marks over the *HoxD* cluster and neighboring regions. ChIP-seq data  
645 is normalized for input control. The DamID tracks show the Dam-normalized *in silico*

646 populations of the various Dam-fusion proteins, while heatmaps show the depth-normalized  
647 single-cell data of the fifty richest cells. The red bar around 74.7 Mb indicates the HoxD cluster.  
648 In **H**, the left red bar indicates the *Lnp* gene, the right bar indicates the *Mtx2* gene.

649

650 **Figure 3. Joint profiling of Polycomb chromatin and gene expression in mouse**  
651 **embryoid bodies**

652 **A**, Schematic showing the experimental design.

653 **B**, UMAP of samples based on CEL-Seq2 readout, colored by cluster.

654 **C-D**, UMAP of samples based on DamID readout, colored by construct (**C**) and cluster (**D**).

655 **E**, Transcriptomic UMAP (left) and DamID UMAP (right), colored by expression of pluripotency  
656 marker *Dppa5a*.

657 **F**, Transcriptomic UMAP (left) and DamID UMAP (right), colored by expression of  
658 hematopoietic regulator *Tal1*.

659 **G**, Genomic tracks of H3K27me3 and RING1B DamID signal per cluster at the *Tal1* locus.

660 **H**, Heatmaps showing the H3K27me3 (left) and RING1B (right) DamID signal of all identified  
661 PRC targets for transcriptional clusters 3, 0, 1, 6, and 4. PRC targets are ordered based on  
662 hierarchical clustering.

663 **I**, Fold-change in expression of Polycomb targets between clusters where the gene is PRC-  
664 associated and clusters where the gene is PRC-free.

665

666 **Figure 4. Polycomb-regulated transcription factors form separate regulatory networks**

667 **A**, Heatmap showing SCENIC regulon activity per single cell. Cells (columns) are ordered by  
668 transcriptional cluster; regulon (rows) are ordered by hierarchical clustering. The black and  
669 white bar on the left indicates whether the regulon TF is a PRC target (black) or not (white).

670 **B**, Example of the relationship between expression and Polycomb regulation for the MSX1  
671 regulon. The pie chart indicates the percentages of Polycomb-controlled or Polycomb-  
672 independent target genes (blue and grey, respectively). Left: boxplots showing target gene  
673 expression (averaged Z-score) per cluster for all target genes. Middle and right: boxplots  
674 showing the H3K27me3 and RING1B DamID signal at the TSS per cluster for the Polycomb-  
675 controlled target genes. The expression and DamID signal of *Msx1* is indicated with a red  
676 circle.

677 **C**, Genomic tracks of H3K27me3 and RING1B DamID signal per cluster at the *Fgf10* locus,  
678 one of the target genes of MSX1.

679 **D**, Boxplots showing the fraction of Polycomb-controlled target genes, split by whether the TF  
680 itself is Polycomb-controlled.

681 **E**, Schematic of the regulatory network, indicating the relationship between a regulon TF  
682 (white hexagon), its upstream regulators (colored hexagons), and its downstream targets  
683 (colored hexagons/circles).

684 **F**, Boxplots showing the fraction of Polycomb-controlled upstream regulators, split by whether  
685 the regulon TF is Polycomb-controlled.

686 **G**, Scatter plot showing the relationship between the fraction of Polycomb-controlled targets  
687 and regulators of a regulon TF. Regulon TFs that are PRC controlled are indicated in blue;  
688 regulon TFs that are PRC independent are indicated in grey. Correlation was computed using  
689 Spearman's rank correlation.

690

### 691 **Figure 5. Notochord-specific H3K9me3 enrichment in the zebrafish embryo**

692 **A**, Schematic representation of the experimental design and workflow.

693 **B**, UMAP based on the transcriptional readout of all single-cell samples passing CEL-Seq2  
694 thresholds ( $n = 3902$ ).

695 **C**, UMAP based on the genomic readout of all single-cell samples passing DamID thresholds  
696 ( $n = 2833$ ). Samples are colored by transcriptional cluster (left) and Dam-targeting domain  
697 (right).

698 **D**, Expression of the hatching gland marker *he1.1* (left) and the notochord marker *co19a2*  
699 (right) projected onto the DamID UMAP.

700 **E**, Genomic H3K9me3 signal over chromosome 17. Top track: H3K9me3 ChIP-seq signal  
701 normalized for input control from the 6-hpf embryo, taken from [Click or tap here to enter text..](#)  
702 Remaining tracks: Combined single-cell DamID MPHOSPH8 data normalized for the Dam  
703 control for clusters 0-2.

704 **F**, Heatmap showing the cluster-specific average H3K9me3 enrichment over all domains  
705 called per ChromHMM state. Only clusters with  $>30$  single-cell MPHOSPH8 and Dam samples  
706 were used for the ChromHMM (i.e., clusters 0-11). Per state, the domains have been clustered  
707 using hierarchical clustering.

708 **G**, Genomic H3K9me3 signal over a part of chromosome 8 for clusters 0-2. The colored  
709 regions at the bottom of each track indicate the ChromHMM state.

710 **H**, Gene density of all genes (top) and expressed genes (bottom) per state.

711 **I**, Enrichment of repeats over all different ChromHMM states. Only repeats having at least 100  
712 copies throughout the genome and an enrichment  $\geq 2$  in at least one state are shown.  
713 Enrichment is computed as the observed number of repeats in a state compared to the  
714 expected number based on the genome coverage of that state. Example repeats are  
715 indicated.

716 **J**, Representative confocal microscopy images of DAPI staining in cryosections of notochord  
717 (left), brain (middle), and skeletal muscle (right) of 15-somite zebrafish embryos.

718

719 **Figure S1. Technical validation of EpiDamID data**

720 **A-B**, Average enrichment over genomic regions of interest for TAF3 (**A**) and CBX7 (**B**) DamID.

721 Left: data generated by fusing Dam to a single protein domain; Right: data generated by fusing

722 Dam to a trimer of the same protein domain. Sample lines are colored by their Information

723 Content (IC).

724 **C**, Clustered heatmap showing the correlation between DamID and ChIP-seq samples.

725 Correlations were computed using Spearman's rank correlation.

726 **D**, UMAPs of samples, colored by construct properties.

727 **E**, UMAPs of samples, colored by DamID-seq depth and Information Content.

728 **F**, Left, average DamID and ChIP-seq enrichment plots over genomic regions of interest.

729 Signal is normalized for untethered Dam and input, respectively. Regions are the TSS of

730 genes for H3K9ac (top), gene bodies for H4K20me1 (middle), and ChIP-seq domains for

731 H3K27me3 (bottom).

732 **F**, Right, genome browser view of ChIP-seq and DamID enrichment corresponding to left

733 panels. The data shown in D-F represents the combined data of all samples of a particular

734 targeting domain.

735

736 **Figure S2: Detection of histone PTMs in single mouse embryonic stem cells with a**  
737 **single-cell implementation of EpiDamID**

738 **A**, Density plot indicating the distribution of the number of unique GATCs detected for each  
739 cell line. The dashed line indicates the threshold used for data filtering.

740 **B**, Density plot indicating the distribution of the Information Content (IC) after filtering on depth  
741 for each cell line. The dashed line indicates the threshold used for data filtering.

742 **C**, Overview of the number (top) and percentage (bottom) of samples retained after filtering  
743 on depth and IC.

744 **D**, Average signal over H3K27me3 ChIP-seq domains of H3K27me3 and H3K27me3<sup>mut</sup>  
745 mintbodies. Top: *in silico* populations normalized for Dam; Bottom: five of the best single-cell  
746 samples (bottom) normalized by read depth.

747 **E**, Signal of H3K27me3<sup>mut</sup> and Dam control over the *HoxD* cluster and neighboring regions.  
748 The DamID track show the Dam-normalized *in silico* populations of H3K27me3<sup>mut</sup>, while the  
749 heatmaps show the depth-normalized single-cell data of the fifty richest cells for H3K27me3<sup>mut</sup>  
750 and Dam. The red bar around 74.7 Mb indicates the *HoxD* cluster.

751

752 **Figure S3. Validation and characterization of scDam&T-seq data in mouse embryoid**  
753 **bodies**

754 **A**, Overview of the number (top) and percentage (bottom) of remaining samples after  
755 application of DamID and/or CEL-Seq2 filtering.

756 **B**, UMAPs of samples based on the integration of our EB transcription data with single-cell  
757 RNA-seq mouse embryonic data [Click or tap here to enter text.](#), colored by reference-annotated  
758 cell type (i), EB-annotated cluster (ii), atlas embryonic day (iii) and EB day (iv). For atlas  
759 integration, the day 0 (i.e., mESC) time point was excluded.

760 **C**, Average expression of known marker genes. Expression was standardized over single-  
761 cells and the per-cluster average was computed.

762 **D**, Bar plots showing the number of cells per cluster assigned by Seurat (i.e. based on  
763 transcriptional readout) or the LDA classifier (i.e. based on DamID readout).

764 **E**, Confusion plots showing the performance of the LDA classifier during training, for each  
765 construct.

766 **F**, Correlation between the combined H3K27me3 and RING1B DamID signal at the TSS of all  
767 genes per transcriptional cluster.

768 **G**, Correlation of combined H3K27me3 and RING1B DamID signal at the TSS of all genes.  
769 Data of all single-cell samples passing DamID thresholds was combined for each construct.

770 **H**, Overlap between a published set of PRC targets during mouse development [Click or tap here](#)  
771 [to enter text.](#) and our PRC targets. Significance of the overlap was computed with a Chi-squared  
772 test.

773 **I**, Boxplots showing the expression (averaged Z-score) of genes identified as significantly  
774 upregulated in cluster 6.

775 **J**, Boxplots showing the H3K27me3 (left) and RING1B (right) DamID signal at the TSS of the  
776 subset of genes shown in **I** that are PRC targets.

777

#### 778 **Figure S4. Characterization of the Polycomb-regulated regulatory network**

779 **A**, Venn diagram showing the overlap between PRC-controlled protein-coding genes (blue)  
780 and transcription factors (TF) (grey) in the context of all protein-coding genes (white). The  
781 significance of the overlap between PRC targets and TFs was computed using a Chi-squared  
782 test.

783 **B**, Boxplots showing the maximum observed H3K27me3 and RING1B DamID signal across  
784 transcriptional clusters for PRC-controlled TFs (grey) and the remaining PRC-controlled  
785 protein-coding genes (white).

786 **C**, Quantification of variability in gene expression of PRC-regulated and PRC-independent  
787 TFs (only expressed genes are included). Boxplots show variance over mean across all single  
788 cells. Significance was computed using a Mann-Whitney-U test.

789 **D**, Clustered heatmaps showing mRNA expression (averaged Z-score) per cluster, of  
790 Polycomb-regulated TFs (left) and Polycomb-independent TFs (right). Only expressed genes  
791 are included in this plot.

792 **E**, The ten most significant Biological Process GO terms between PRC-controlled and PRC-  
793 independent TFs.

794 **F**, Number of targets of each regulon TF, split by whether or not the TF is PRC-regulated.  
795 Difference between categories was tested with a Mann-Whitney-U test.

796 **G**, Top: Venn diagram displaying the overlap between genes that are targets of a PRC-  
797 controlled TF (blue) and genes that are targets of a PRC-independent TF (grey).

798 **G**, Bottom: Bar plot showing the fraction of targets in each category that is PRC-regulated.

799 **H**, Clustered heatmap showing mRNA expression (averaged Z-score) per cluster, of all  
800 regulon TFs, grouped by lineage-specific or non-specific genes. TFs are annotated as PRC-  
801 controlled (black) or PRC independent (white).

802 **I**, Scatter plot showing the relationship between the fraction of Polycomb-controlled targets  
803 and regulators of a regulon TF. Regulon TFs that are PRC controlled are indicated in blue;  
804 regulon TFs that are PRC independent are indicated in grey. Regulon TFs are split based on  
805 the groups indicated in **H**. Correlation was computed using Spearman's rank correlation.

806

807 **Figure S5.1: Characterization of transcriptomic clusters and associated genomic**  
808 **H3K9me3 enrichments**

809 **A**, Comparison of our data with a published H3K9me3 ChIP-seq dataset of the 6-hpf zebrafish  
810 embryo [Click or tap here to enter text..](#) All single-cell MPHOSPH8 and Dam samples were  
811 combined to generate an *in silico* whole-embryo data set; DamID data is the log2OE of  
812 MPHOSPH8 signal over Dam is shown; ChIP-seq is the log2OE of H3K9me3 over input  
813 control.

814 **B**, Expression of marker genes over all clusters, ordered by cell type. The average single-cell  
815 Z-scores are shown.

816 **C**, Confusion plots showing the performance of the LDA classifier during training, for each  
817 construct.

818 **D**, Genomic H3K9me3 signal over chromosome 14. For clusters 0-2, the cluster-specific signal  
819 (color) is compared to the combined signal from all other clusters (black). Each set indicates  
820 the overlay, where overlapping regions are colored grey.

821 **E**, Distribution of domain sizes per ChromHMM state and for states A1-3 combined.

822 **F**, Total genomic coverage per ChromHMM state.

823 **G**, PANTHER protein-class enrichments [Click or tap here to enter text.](#) for genes found in state A1  
824 (top) and B (bottom).

825 **H**, H3K9me3 enrichment at differentially expressed genes for each cluster. Each boxplot  
826 shows for upregulated, downregulated and stable genes the H3K9me3 signal of the  
827 corresponding cluster and the combined signal of the complementary clusters. The  
828 significance of the difference in H3K9me3 was tested with a Mann-Whitney-U test, \*\*\*  
829 indicates a p-values smaller than 0.001, \*\* a p-value smaller than 0.01, \* a p-value smaller  
830 than 0.1, and n.s. a p-value larger than 0.1.

831

832 **Figure S5.2: Characterization of repeat content, expression of chromatin factors and**  
833 **nuclear localization of H3K9me3 chromatin**

834 **A**, Enrichment of repeats per class for all ChromHMM states. Enrichment is computed as the  
835 observed number of repeats within a state relative to the expected number based on the  
836 genome coverage of each state.

837 **B**, H3K9me3 enrichment at Gypsy-169-I\_DR repeats across ChromHMM states. The  
838 heatmaps show the enrichment per individual repeat instance, while the line plot shows the  
839 average enrichment per state.

840 **C**, Enrichment of repeats in ChromHMM states as in Figure 5I. Only repeats having at least  
841 100 copies throughout the genome and an enrichment  $\geq 1.5$  in state B are included.  
842 Enrichment is computed as the observed number of repeats in a stated compared to the  
843 expected number based on the genome coverage of that state.

844 **D**, Expression of various chromatin factors across clusters 0-11. The left heatmap shows the  
845 average single-cell expression (Z-score); the right heatmaps shows the fraction of cells in each  
846 cluster with at least one transcript of each gene. Only factors that are expressed in at least  
847 10% of cells of at least one cluster are shown.

848 **F**, Representative images of H3K9me3 staining in cryo-sections of notochord (left), brain  
849 (middle), and skeletal muscle (right) in 15-somite embryos.

850

851



## 852 **Methods**

853

### 854 **Chromatin immunoprecipitation followed by high-throughput sequencing**

855 Mouse embryonic stem cells and hTERT-immortalized RPE-1 cells were cultured following  
856 ATCC instructions. ChIP-seq was performed as described previously (Collas, 2011), with the  
857 following adaptations. Cells were harvested by trypsinization, and chemically crosslinked with  
858 fresh formaldehyde solution (1% in PBS) for 8 minutes while rotating at room temperature.  
859 Crosslinking was quenched with glycine on ice and sample was centrifuged at 500 g for 10  
860 min at 4 °C. Pellet was then resuspended in lysis buffer for 5 min on ice and sonicated as  
861 follows: 16 cycles of 30 s on / 30 s off at max power (Bioruptor Diagenode), and centrifuged  
862 at 14,000 rpm at 4 °C for 10 min. The chromatin in supernatant was treated with RNase A for  
863 30 min at 37 °C, and Proteinase K for 4 hours at 65 °C to reverse crosslinks, then cleared  
864 using DNA purification columns and eluted in nuclease-free water. Chromatin was incubated  
865 with antibodies (see below), after which Protein G beads (ThermoFisher #88847) were added  
866 for antibody binding. After successive washing, samples were cleared using DNA purification  
867 columns, eluted in nuclease-free water, and measured using a Qubit fluorometer. Libraries  
868 were prepared according to the Illumina TruSeq DNA LT kit and sequenced on the Illumina  
869 HiSeq 2500 following manufacturer's protocols. Up to 50 ng of immunoprecipitated chromatin  
870 was used as input for library preparation. Antibodies used were: anti-H3K4me3 Abcam  
871 ab8580, anti-H3K9ac Abcam ab4441, anti-H3K9me3 Abcam ab8898, anti-H3K27me3 Merck  
872 Millipore 07-449, anti-H3K36me3 Active Motif 61902, anti-H4K20me1 Abcam ab9051.

873

### 874 **Lentiviral DamID construct design and production**

875 The constructs for mintbodies, chromatin binding domains, and full-length protein constructs  
876 were fused to Dam in both possible orientations under the control of the auxin-inducible degenon  
877 (AID) system (Kubota et al., 2013; Nishimura et al., 2009) with either the hPGK or HSP  
878 promoter, and cloned into the pCCL.sin.cPPT.ΔLNGFR.Wpre lentiviral construct (Amendola  
879 et al., 2005) by standard cloning procedures. Lentivirus was produced as previously described  
880 (Amendola et al., 2005) and the PGK viruses were concentrated approximately 40-fold using  
881 Amicon Ultra-15 centrifugal filter units (Merck #UFC910024), the HSP expressed viruses were  
882 used unconcentrated.

883

### 884 **Bulk DamID2**

885 hTERT-RPE1 cells were grown in DMEM/F12 (Gibco) containing 10% FBS (Sigma F7524 lot  
886 BCBW6329) and 1% Pen/Strep (Gibco) in 6-well plates. At 30% confluence, cells were  
887 transduced with 1500 μL total volume unconcentrated lentivirus, amounts ranging between

888 20-1500  $\mu$ L unconcentrated lentivirus (or 0.1-40  $\mu$ L concentrated) in the presence of 10  $\mu$ g/mL  
889 polybrene. Cells were collected for genomic DNA isolation (Wizard, Promega) 48 h after  
890 transduction. Dam methylation levels were checked by  $m^6$ A-PCR as previously described (de  
891 Luca & Kind, 2021; Vogel et al., 2007) and sequenced following the DamID2 protocol (Markodimitraki  
892 et al., 2020).

893

### 894 **Immunofluorescent staining and confocal imaging**

895 Viral transduction was performed as described above for bulk DamID2, with the exception that  
896 RPE-1 cells were grown on glass coverslips. Two days after transduction, cells were washed  
897 with PBS and chemically crosslinked with fresh formaldehyde solution (2% in PBS) for 10  
898 minutes at RT, permeabilized (with 0.5% IGEPAL® CA-630 in PBS) for 20 minutes and  
899 blocked (with 1% bovine serum albumin (BSA) in PBS) for 30 minutes. All antibody incubations  
900 were performed in final 1% BSA in PBS followed by three PBS washes at RT. Incubation with  
901 primary antibody against the endogenous histone modification as well as purified  $m^6$ A-Tracer  
902 protein (Schaik et al., 2020) (recognizing methylated DNA) was performed at 4 °C for 16 hours  
903 (overnight), followed by anti-GFP (against  $m^6$ A-Tracer protein) incubation at RT for 1 hour, and  
904 secondary antibody incubations at RT for 1 hour. The final PBS wash was simultaneously an  
905 incubation with DAPI at 0.5  $\mu$ g/mL for 2 min, followed by a wash in MilliQ and sample mounting  
906 on glass slides using VECTASHIELD Antifade mounting medium (Vector Laboratories).  
907 Primary antibodies: anti-H3K9ac abcam ab4441 (rabbit) at 1:1000, anti-H3K9me3 abcam  
908 ab8898 (rabbit) at 1:300, anti-GFP Aves GFP-1020 (chicken) at 1:1000. Secondary  
909 antibodies: AlexaFluor anti-chicken 488 at 1:500 and anti-rabbit 647 at 1:500. Imaging was  
910 performed on a Leica SP8 confocal microscope with a 63x (NA 1.40) oil-immersion objective.  
911 Images were processed in Imaris 9.3 (Bitplane) by baseline subtraction. Additional  
912 background correction was done with a 1- $\mu$ M Gaussian filter for the images of Dam-CBX1  
913  $m^6$ A-Tracer and H3K9me3 stainings.

914

### 915 **Generation of mouse embryonic stem cell lines**

916 The various stable clonal F1 hybrid mESC lines for the initial single cell experiments were  
917 created by lentiviral co-transduction of pCCL-EF1 $\alpha$ -Tir1-IRES-puro and pCCL-hPGK-AID-  
918 Dam-POI constructs with a 4:1 ratio in a EF1 $\alpha$ -Tir1-IRES-neo mother line (Rooijers et al.,  
919 2019), after which the cells were selected for 10 days on 0.1% gelatine coated 10-cm dishes  
920 in 60% Buffalo Rat Liver (BRL)-conditioned medium containing 0.8  $\mu$ g/mL puromycin (Sigma  
921 P9620), 250  $\mu$ g/mL G418 (ThermoFisher 11811031) and 0.5 mM IAA. Individual puromycin  
922 resistant colonies were handpicked and tested for the presence of the constructs by PCR  
923 using Dam specific primers fw-ttcaacaaaagccaggatcc and rev-gacagcgggtgcataagggcg.

924

925 The clonal F1 hybrid knock-in cell lines were CRISPR targeted in a mother line carrying Tir1-  
926 Puro in the TIGRE locus (Zeng et al., 2008). For all CRISPR targeting, cells were cultured on  
927 gelatin-coated 6-wells in 60% BRL conditioned medium to 70-90% confluency and transfected  
928 with Lipofectamin3000 (Invitrogen L3000008) according to the supplier protocol with 2 µg  
929 donor vector and 1 µg Cas9/guide vector. At 24 h after transfection the cells were split to a  
930 gelatin-coated 10-cm dish and antibiotic selection of transfected cells is started 48 h after  
931 transfection. Cells were selected with 60% BRL conditioned medium containing 0.8 µg/mL  
932 puromycin for the Tir1 knock-in and 2.5 µg/mL blasticidin (Invivogen) for the AID-Dam knock-  
933 in lines. After 5-10 days of selection, individual colonies were manually picked and screened  
934 by PCR for the correct genotype.

935

936 All CRISPR knockin lines were made in a Tir1-TIGR mother line that was generated by co-  
937 transfection of Cas9-gRNA plasmid pX330-EN1201(Addgene plasmid #92144) and donor  
938 plasmid pEN396-pCAGGS-Tir1-V5-2A-PuroR TIGRE (Addgene plasmid #92142) (Nora et al.,  
939 2017). The Tir1-puro clones were screened for the presence of Tir1 by PCR from the CAGG  
940 promoter to Tir1 with the primers fw-cctctgctaaccatgttcatg and rev-tccttcacagctgatcagcacc,  
941 followed by screening for correct integration in the TIGRE locus by PCR from the polyA to the  
942 TIGRE locus with primers fw-gggaagagaatagcaggcatgct and rev-accagccactcaagtggtacc.  
943 The Tir1 expression is further confirmed by Western blot using a V5 antibody (Invitrogen R960-  
944 25).

945

946 A knock-in of AID-Dam in the N-terminus of the RING1B locus was made by co-transfection  
947 of a donor vector carrying the blasticidin-p2A-HA-mAID-Dam cassette flanked by 2 500bp  
948 homology arms of the endogenous RING1B locus (pHom-BSD-p2A-HA-mAID-Dam) and  
949 p225a-RING1B spCas9-gRNA vector (sgRNA: 5'gctttttattcctagaaatgtctc3') as described  
950 above. Picked clones were screened for correct integration by PCR with primers from Dam to  
951 the RING1B locus outside the targeting construct; fw-gaacaacaagcgcacatctggc and rev-  
952 tcctcccctaactgcttttg. Presence of the RING1B wildtype allele was checked by PCR with  
953 primers fw-tcctcccctaactgcttttg and rev-gccttgctgcttggttg. The H3K27me3 mintbody  
954 coupled to ER-mAID-Dam was knocked into the Rosa26 locus by co-transfection of pHom-  
955 ER-mAID-V5-Dam-scFv\_H3K27me3-P2A-BSD-Hom donor vector and p225a-Rosa26  
956 spCas9-RNA vector (sgRNA: gtccagtctttctagaagatgggc) as described above. Picked clones  
957 were screened for correct integration by PCR from a sequence adjacent to the Rosa homology  
958 arm to the Rosa26 locus with primers fw- gaactccatataatggctatg and rev-cttggtgcgtttgctgggga.  
959 The untethered mAID-Dam was knocked into the Rosa26 locus by co-transfection with the  
960 pHom-ER-mAID-V5-Dam-P2A-BSD-Hom donor vector and p225a-Rosa26 spCas9-RNA

961 vector (sgRNA: gtccagctcttctagaagatgggc) as described above. Picked clones were screened  
962 for correct integration by PCR with the same primers as for the Dam-H3K27me3 mintbody  
963 knock-in line.

964

965 All clones with correct integrations were furthermore screened for their level of induction upon  
966 IAA removal by <sup>m6</sup>A-PCR evaluated by gel electrophoresis (de Luca & Kind, 2021; Vogel et al., 2007),  
967 followed by DamID2 sequencing in bulk (Markodimitraki et al., 2020), to select the clone with  
968 a correct karyotype and the best signal to noise ratio of enrichment over expected regions or  
969 chromatin domains. Finally, the best 3-4 clones were selected for testing of IAA removal timing  
970 in single cells by DamID2.

971

### 972 **Mouse embryonic stem cell culture and induction of Dam-fusion proteins**

973 F1 hybrid 129/Sv:Cast/Eij mouse embryonic stem cells (mESCs) were cultured on irradiated  
974 primary mouse embryonic fibroblasts (MEFs), in mESC culture media CM+/+ defined as  
975 follows: G-MEM (Gibco) supplemented with 10% FBS (Sigma F7524 lot BCBW6329), 1%  
976 Pen/Strep (Gibco), 1x GlutaMAX (Gibco), 1x non-essential amino acids (Gibco), 1x sodium  
977 pyruvate (Gibco), 0.1 mM β-mercaptoethanol (Sigma) and 1000 U/mL ESGROmLIF (EMD  
978 Millipore ESG1107). Cells were split every 3 days and medium was changed every other day.  
979 Expression of the Dam-POI constructs was suppressed by addition of 0.5 mM indole-3-acetic  
980 acid (IAA; Sigma, I5148). Lines were tested routinely for mycoplasma.

981

982 When plated for targeting or genomics experiments, cells were passaged at least 2 times in  
983 feeder-free conditions, on plates coated with 0.1% gelatin, grown in 60% BRL-conditioned  
984 medium, defined as follows and containing 1 mM IAA: 40% CM+/+ medium and 60% of CM+/+  
985 medium conditioned on BRL cells. For timed induction of the constructs the IAA was washed  
986 out at different clone specific optimized times before single cell sorting.

987

### 988 **Embryoid body differentiation and induction of Dam-fusion proteins**

989 For EB differentiation, the stable knock-in F1ES lines were cultured for 2 weeks on plates  
990 coated with 0.1% gelatin, grown in 2i+LIF ES cell culture medium defined as follows: 48%  
991 DMEM/F12 (Gibco) and 48% Neurobasal medium (Gibco), supplemented with 1x N2 (Gibco),  
992 1x B27 supplement + vitamin A (Gibco), 1x non-essential amino acids, 1% FBS, 1%  
993 Pen/Strep, 0.1mM β-mercaptoethanol, 1 μM PD0325901 (Axon Medchem, PZ0162-5MG), 3  
994 μM CHIR99021 (Tocris, SML1046-5MG), 1000 U/mL ESGRO mLIF. EB differentiation was  
995 performed according to ATCC protocol. On day 1 of differentiation, 2x10<sup>6</sup> cells were grown  
996 in suspension on a non-coated bacterial 10-cm dish with 15 mL CM +/- (with β-  
997 mercaptoethanol, without LIF) and 0.5 mM IAA. On day 2, half the cell suspension was divided

998 over five non-coated bacterial 10-cm dishes each containing 15mL CM+/- medium and 0.5  
999 mM IAA. Plates were refreshed every other day. EBs were harvested at day 7, 10, and 14.  
1000 Two days before single-cell sorting, the EBs were grown in CM+/- medium containing 1 mM  
1001 IAA, and induced as follows: 6 h without IAA (RING1B); 20 h without IAA and 7 h with 1  $\mu$ M  
1002 4OHT (Sigma SML1666) (Dam-H3K27me3-mintbody); 7 h without IAA and 4 h with 1  $\mu$ M  
1003 4OHT (untethered Dam). The EBs were evaluated by brightfield microscopy and hand-picked  
1004 for further handling (see below).

1005

### 1006 **FACS for single-cell experiments**

1007 FACS was performed on BD FACSJazz or BD FACSIInflux Cell Sorter systems with BD  
1008 Software. mESCs and EBs were harvested by trypsinization, centrifuged at 300 g,  
1009 resuspended in medium containing 20  $\mu$ g/mL Hoechst 34580 (Sigma 63493) per  $1 \times 10^6$  cells  
1010 and incubated for 45 minutes at 37°C. Prior to sorting, cells were passed through a 40- $\mu$ m cell  
1011 strainer. Propidium iodide (1  $\mu$ g/mL) was used as a live/dead discriminant. Single cells were  
1012 gated on forward and side scatters and Hoechst cell cycle profiles. Index information was  
1013 recorded for all sorts. One cell per well was sorted into 384-well hard-shell plates (Biorad,  
1014 HSP3801) containing 5  $\mu$ L of filtered mineral oil (Sigma #69794) and 50 nL of 0.5  $\mu$ M barcoded  
1015 CEL-Seq2 primer (Markodimitraki et al., 2020; Rooijers et al., 2019). In the EB experiment,  
1016 the knock-in mESC lines were cultured alongside on 2i+LIF medium and included as a  
1017 reference at each timepoint.

1018

### 1019 **Single-cell Dam&T-seq**

1020 The scDam&T-seq protocol was performed as previously described in detail (Markodimitraki  
1021 et al., 2020), with the adaptation that all volumes were halved to reduce costs. Liquid reagent  
1022 dispensation steps were performed on a Nanodrop II robot (Innovadyne Technologies / BioNex).  
1023 Addition of barcoded adapters was done with a mosquito LV (SPT Labtech). In short, after  
1024 FACS, 50 nL per well of lysis mix (0.07% IGEPAL, 1 mM dNTPs, 1:50,000 ERCC RNA spike-  
1025 in mix (Ambion, 4456740)) was added, followed by incubation at 65 °C for 5 min. 100 nL of  
1026 reverse transcription mix (1 $\times$  First Strand Buffer and 10 mM DTT (Invitrogen, 18064-014), 2 U  
1027 RNaseOUT Recombinant Ribonuclease Inhibitor (Invitrogen, 10777019), 10 U SuperscriptII  
1028 (Invitrogen, 18064-014)) was added, followed by incubation at 42 °C for 2 h, 4 °C for 5 min and  
1029 70 °C for 10 min. Next, 885 nL of second strand synthesis mix (1 $\times$  second strand buffer  
1030 (Invitrogen, 10812014), 192  $\mu$ M dNTPs, 0.006 U *E. coli* DNA ligase (Invitrogen, 18052019),  
1031 0.013 U RNase H (Invitrogen, 18021071), 0.26 U *E. coli* DNA polymerase (Invitrogen)) was  
1032 added, followed by incubation at 16 °C for 2 h. 250 nL of protease mix was added (1 $\times$  NEB  
1033 CutSmart buffer, 1.0 mg/mL Proteinase K (Roche, 000000003115836001)), followed by  
1034 incubation at 50 °C for 10 h and 80 °C for 20 min. Next, 115 nL of DpnI mix (1 $\times$  NEB CutSmart

1035 buffer, 0.1 U NEB DpnI) was added, followed by incubation at 37 °C for 6 h and 80 °C for  
1036 20 min. Finally, 50 nL of 0.5uM DamID2 adapters were dispensed (final concentrations 25  
1037 nM), followed by 400 nL of ligation mix (1× T4 Ligase buffer (Roche, 10799009001), 0.13U T4  
1038 Ligase (Roche, 10799009001)) and incubation at 16°C for 16 h and 65°C for 10 min. Contents  
1039 of all wells were pooled and the aqueous phase was recovered by centrifugation and transfer  
1040 to clean tubes. Samples were purified by incubation for 10 min with 0.8 volumes magnetic  
1041 beads (CleanNA, CPCr-0050) diluted 1:7 with bead binding buffer (20% PEG8000, 2.5 M  
1042 NaCl), washed twice with 80% ethanol and resuspended in 8 µL of nuclease-free water before  
1043 in vitro transcription at 37 °C for 14 h using the MEGAScript T7 kit (Invitrogen, AM1334).  
1044 Library preparation was done as described in the CEL-Seq2 protocol with minor adjustments  
1045 (Hashimshony et al., 2016). Amplified RNA (aRNA) was purified with 0.8 volumes beads as  
1046 described above, and resuspended in 20 µL of nuclease-free water, and fragmented at 94 °C  
1047 for 90 sec with the addition of 0.25 volumes fragmentation buffer. Fragmentation was stopped  
1048 by addition of 0.1 volumes of 0.5 M EDTA pH 8 and quenched on ice. Fragmented aRNA was  
1049 purified with beads as described above, and resuspended in 12 µL of nuclease-free water.  
1050 Thereafter, library preparation was done as previously described (Hashimshony et al., 2016)  
1051 using up to 7 µL or approximately 150 ng of aRNA, and 8-10 PCR cycles depending on input  
1052 material. Libraries were sequenced on the Illumina NextSeq500 (75-bp reads) or  
1053 NextSeq2000 (100-bp reads) platform.

1054

## 1055 **Zebrafish**

1056 All animal experiments were conducted under the guidelines of the animal welfare committee  
1057 of the Royal Netherlands Academy of Arts and Sciences (KNAW). Adult zebrafish (*Danio rerio*)  
1058 were maintained and embryos raised and staged as previously described (Aleström et al., 2019;  
1059 WESTERFIELD & M., 2000).

1060

## 1061 **Collection of zebrafish samples and FACS**

1062 Tübingen longfin (wild type) pairs were set up and the following morning, approximately 1 nL  
1063 of 1 ng/µL *Dam-Mphosph8* mRNA or 0.5 ng/µL *Dam-Gfp* mRNA was injected into the yolk at  
1064 the 1 cell stage. Embryos were slowed down overnight at 23°C and the following morning all  
1065 embryos were manually dechorionated. At 15-somite stage, embryos were transferred to 2-  
1066 mL Eppendorf tubes and digested with 0.1% Collagenase type II from CI. Histolyticum (Gibco)  
1067 in Hanks Balanced Salt Solution without Mg<sup>2+</sup>/Ca<sup>2+</sup> (ThermoFisher) for 20-30 mins at 32°C with  
1068 constant shaking. Once embryos were noticeably digested, cell solution was spun at 2000 g  
1069 for 5 min at room temperature and the supernatant was removed. Cell pellet was resuspended  
1070 with TrypLE Express (ThermoFisher) and digested for 10 min at 32°C with constant shaking.  
1071 Cell solution was inactivated with 10% Fetal Bovine Serum (ThermoFisher) in Hanks Balanced

1072 Salt Solution without Mg<sup>2+</sup>/Ca<sup>2+</sup> and filtered through a 70- $\mu$ m cell strainer (Greiner Bio-One).  
1073 Cells were pelleted at 2000g 5min room temperature and washed twice with 10% Fetal Bovine  
1074 Serum (Thermofisher) in Hanks Balanced Salt Solution without Mg<sup>2+</sup>/Ca<sup>2+</sup>. Hoechst 34580 at  
1075 a final concentration of 16.8  $\mu$ g/mL was added to the cell solution and incubated for 30 mins  
1076 at 28°C in the dark. Solution was then filtered through a 40- $\mu$ m cell strainer (Greiner Bio-One),  
1077 and propidium iodide was added at a final concentration of 5  $\mu$ l/ml. FACS was performed on  
1078 BD FACSIInflux as described above, retaining only cells in G2/M phase based on Hoechst  
1079 DNA content. Plates were processed for scDam&T-seq as described above.

1080

### 1081 **Immunofluorescent staining and confocal imaging of zebrafish embryos**

1082 Embryos at 15-somite stage were fixed in 4% PFA (Sigma) for 2 h at RT, followed by washes  
1083 in PBS. Embryos were then washed three times in 4% sucrose/PBS and allowed to equilibrate  
1084 in 30% sucrose/PBS at 4°C for 3-5 h. Embryos were suspended in Tissue Freezing Medium  
1085 (Leica) orientated in the sagittal plane and frozen with dry ice. Blocks were sectioned at 8  $\mu$ m  
1086 and slides were rehydrated in PBS, treated with -20°C pre-cooled acetone for 7 min at -20°C,  
1087 washed three times with PBS and digested with Proteinase K (Promega) at a final  
1088 concentration of 10  $\mu$ g/mL for 3 min, washed 1x PBS and incubated in blocking buffer (10%  
1089 Fetal Bovine Serum, 1% DMSO, 0.1% Tween20 in PBS) for 30 min. Primary antibody was  
1090 diluted in blocking buffer and slides incubated overnight at 4°C. Slides were washed the  
1091 following day and incubated with the appropriate AlexaFluor secondary antibodies (1:500),  
1092 DAPI (0.5  $\mu$ g/mL) and Phalloidin-TRITC (1:200) diluted in blocking buffer for 1 h at RT. Slides  
1093 were washed, covered with glass coverslips with ProLong Gold Antifade Mountant  
1094 (Thermofisher) and imaged at 63X with a LSM900 confocal with AiryScan2 (Zeiss). Images  
1095 were viewed and processed in Imaris 9.3 (Bitplane) and Adobe Creative Cloud (Adobe).  
1096 Primary antibody: anti-H3K9me3 abcam ab8898 at 1:500 (Chandra et al., 2012).

1097

### 1098 **Processing DamID and scDam&T-seq data**

1099 Data generated by the DamID and scDam&T-seq protocols was largely processed with the  
1100 workflow and scripts described in (Markodimitraki et al., 2020) (see also  
1101 [www.github.com/KindLab/scDamAndTools](http://www.github.com/KindLab/scDamAndTools)). The procedure is described in short below.

1102

#### 1103 *Demultiplexing*

1104 All reads are demultiplexed based on the barcode present at the start of R1 using a reference  
1105 list of barcodes. In the case of scDam&T-seq data, the reference barcodes contain both  
1106 DamID-specific and CELseq-specific barcodes and zero mismatches between the observed  
1107 barcode and reference are allowed. In the case of the population DamID data, the reference

1108 barcodes only contain DamID-specific barcodes and one mismatch is allowed. The UMI  
1109 information, also present at the start of R1, is appended to the read name.

1110

#### 1111 *DamID data processing*

1112 DamID reads are aligned using bowtie2 (v. 2.3.3.1) (Langmead & Salzberg, 2012) with the following  
1113 parameters: “--seed 42 --very-sensitive -N 1”. For human samples, the hg19 reference  
1114 genome is used; for mouse samples, the mm10 reference genome; and for zebrafish samples  
1115 the GRCz11 reference genome. The resulting alignments are then converted to UMI-unique  
1116 GATC counts by matching each alignment to known strand-specific GATC positions in the  
1117 reference genome. Any reads that do not align to a known GATC position or have a mapping  
1118 quality smaller than 10 are removed. In the case of bulk DamID samples, up to 64 unique  
1119 UMIs are allowed per GATC position, while up to 4 unique UMIs are allowed for single-cell  
1120 samples to account for the maximum number of alleles in G2. Finally, counts are binned at  
1121 the desired resolution.

1122

#### 1123 *CELseq data processing*

1124 CELseq reads are aligned using tophat2 (v. 2.1.1) (Kim et al., 2013) with the following  
1125 parameters: “--segment-length 22 --read-mismatches 4 --read-edit-dist 4 --min-anchor 6 --min-  
1126 intron-length 25 --max-intron-length 25000 --no-novel-juncs --no-novel-indels --no-coverage-  
1127 search --b2-very-sensitive --b2-N 1 --b2-gbar 200”. For mouse samples, the mm10 reference  
1128 genome and the GRCm38 (v. 89) transcript models are used. For zebrafish samples, the  
1129 GRCz11 reference genome and the adjusted transcript models published by the Lawson lab  
1130 (Lawson et al., 2020) are used. Alignments are subsequently converted to transcript counts  
1131 per gene with custom scripts that assign reads to genes similar to HTSeq’s (Anders et al.,  
1132 2015) htseq-count with mode “intersection\_strict”.

1133

#### 1134 **Processing of ChIP-seq data**

1135 External ChIP-seq datasets were downloaded from the NCBI GEO repository and the  
1136 ENCODE database (Davis et al., 2018). The external ChIP-seq data used in this manuscript  
1137 consists of: H3K9ac ChIP-seq in mESC (ENCSR000CGP), H3K27me3 ChIP-seq in mESC  
1138 (ENCSR059MBO), and H3K9me3 ChIP-seq in 6-hpf zebrafish embryos (Laue et al.,  
1139 2019) (GSE113086). Internal and external ChIP-seq data were processed in an identical  
1140 manner. First reads were aligned using bowtie2 (v. 2.3.3.1) with the following parameters: “--  
1141 seed 42 --very-sensitive -N 1”. Indexes for the alignments were then generated using  
1142 “samtools index” and genome coverage tracks were computed using the “bamCoverage” utility  
1143 from DeepTools (v. 3.3.2) (Ramírez et al., 2016) with the following parameters: “--  
1144 ignoreDuplicates --minMappingQuality 10”. For marks that exist in broad domains in the



1145 genome, domains were called using MUSIC (Harmanci et al., 2014) according to the  
1146 suggested workflow (<https://github.com/gersteinlab/MUSIC>). For marks that form narrow  
1147 peaks in the genome, peaks were called using MACS2 (v. 2.1.1.20160309) using the “macs2  
1148 callpeak” utility with the following parameters: “-q 0.05”.

1149

### 1150 **Computing the Information Content (IC) of DamID samples**

1151 The Information Content (IC) of a DamID sample is a measure of how much structure is in the  
1152 detected methylation signal. It is essentially an adaptation of the RNA-seq normalization  
1153 strategy called PoissonSeq (Li et al., 2012). Its goal is to compare the obtained signal to a  
1154 background signal (the density of mappable GATCs), identify regions where the signal is  
1155 similar to background, and finally compare the amount of total signal (i.e. total GATC counts)  
1156 to the total signal in background regions. The IC is the ratio of total signal over background  
1157 signal and can be used to filter out samples that contain little structure in their data.

1158

1159 As an input, we use the sample counts binned at 100-kb intervals, smoothed with a 250-kb  
1160 gaussian kernel. The large bin size and smoothing are necessary when working with single-  
1161 cell samples that have very sparse and peaky data and would otherwise be difficult to match  
1162 to the background signal. As a control, we use the number of mappable GATCs in the same  
1163 100-kb bins, similarly smoothed. We subsequently remove all genomic bins that do not have  
1164 any observed counts in the sample. Our starting data is then  $X$ , a matrix with size  $(n, k)$ , where  
1165  $n$  is the number of genomic bins and  $k$  is the number of samples. Since we are comparing  
1166 one experimental sample with the control,  $k$  is always 2.  $X_{ij}$  denotes the number of counts  
1167 observed in the  $i$ th bin of the  $j$ th sample. We first compute the expected number of counts for  
1168 each  $X_{ij}$  based on the marginal probabilities of observing counts in each bin and in each  
1169 sample:

$$1170 \quad d = \sum_{i=1}^n \sum_{j=1}^k X_{ij}$$

1171

$$1172 \quad p = \sum_{j=1}^k X_j/d = (p_1 \dots p_n)^T$$

1173

$$1174 \quad q = \sum_{i=1}^n X_i/d = (q_1, q_2)$$

1175

$$1176 \quad E = d(p \cdot q)$$

1177

1178 Where  $d$  is the total sum of  $X_{ij}$ ;  $p_i$  is the marginal probability of observing counts in bin  $i$ ;  $p_j$  is  
1179 the marginal probability of observing counts in sample  $j$ ; and  $E$  is the matrix of size  $(n, k)$   
1180 where entry  $E_{ij}$  is the expected number of counts in bin  $i$  for sample  $j$ , computed as  $p_i q_j d$ .

1181

1182 We subsequently compute the goodness of fit of our predictions compared to the actual counts  
1183 per bin:

$$g = \sum_{j=1}^k \frac{X_j - E_j}{E_j}$$

1185

1186 Where  $g_i$  is the measure of how well the predictions of  $E_i$  match the observed counts in  $X_i$  in  
1187 bin  $i$ . The better the prediction, the closer  $g_i$  is to zero, indicating that the signal of the  
1188 experimental sample closely resembles the background in bin  $i$ . Next, an iterative process is  
1189 performed where in each step a subset of the original bins is chosen that exclude bins with  
1190 extreme values of  $g$ . Specifically, all bins with a goodness of fit in the top and bottom 5<sup>th</sup>  
1191 percentiles are excluded to progressively move towards a stable set of bins where the sample  
1192 resembles the background. After each iteration, the chosen bins are compared to the previous  
1193 set of bins and when this has stabilized, or when the maximum number of iterations is reached,  
1194 the procedure stops. In practice, convergence is usually reached after only a couple of  
1195 iterations. The IC is then computed for the experimental sample as the ratio of its summed  
1196 total counts to the sum of counts observed in the final subset of bins.

1197

### 1198 **Population DamID data filtering and analyses**

1199 The population DamID samples were filtered based on a depth threshold of 100,000 UMI-  
1200 unique GATC counts and an IC of at least 1.1. Per Dam-construct, the best samples based  
1201 on the IC were maintained. Samples were normalized for the total number of counts using  
1202 reads per kilobase per million (RPKM). Normalization for Dam controls was performed by  
1203 adding a pseudo count of 1, taking the per bin fold-change with Dam, and performing a log<sub>2</sub>-  
1204 transformation, resulting in log<sub>2</sub> observed-over-expected (log<sub>2</sub>OE) values. The UMAP  
1205 presented in [Figure 1B](#) was computed by performing principal component analysis (PCA) on  
1206 the RPKM-normalized samples (20-kb bins) and using the top components for UMAP  
1207 computation in python with custom scripts. For the correlations presented in [Figure 1C](#) and  
1208 [S1C](#), the RPKM-normalized DamID values were normalized for the density of mappable  
1209 GATCs and log-transformed. The Spearman's rank correlation was then computed with the  
1210 input-normalized ChIP-seq values of the various marks.

1211

## 1212 **Single-cell DamID data filtering and analyses**

### 1213 *Filtering and normalizing scDamID data*

1214 Single-cell DamID samples were filtered based on a depth and an IC threshold. For the mouse  
1215 samples, these thresholds were 3,000 unique GATCs and an IC within the range of 1.5 to 7  
1216 (the upper threshold removes samples with very sparse profiles); for zebrafish, these  
1217 thresholds were 1,000 unique GATCs and an IC within the range of 1.2 to 7. For the zebrafish  
1218 samples, chromosome 4 was excluded when determining depth and IC (and in all downstream  
1219 analyses) since the reference assembly of this chromosome is poor and alignments unreliable.  
1220 The quality of scDam&T-seq samples is determined separately for the DamID readout and the  
1221 CEL-Seq2 readout. To preserve as much of the data as possible, we used all samples passing  
1222 DamID thresholds for analyses that relied exclusively on the DamID readout. Wherever single-  
1223 cell data was used, samples were normalized for their total number of GATCs, scaled by a  
1224 factor 10,000, and log-transformed with a pseudo-count of 1, equivalent to the normalizations  
1225 customarily performed for single-cell RNA-seq samples. To generate *in silico* populations  
1226 based on single-cell samples, the binned UMI-unique counts of all single-cells were combined  
1227 and normalization was performed equivalent to population DamID samples.

1228

### 1229 *scDamID UMAPs*

1230 The UMAPs presented in [Fig. 2A](#), [Fig. 3C](#) and [Fig. 5C](#) were computed by performing PCA on  
1231 the depth-normalized single-cell samples and using the top components for UMAP  
1232 computation. Since in EBs inactivation of chromosome X can coincides with a strong  
1233 enrichment of H3K27me3/RING1B on that chromosome, we depth-normalized these samples  
1234 using the total number of GATCs on somatic chromosomes. For the zebrafish samples,  
1235 chromosome 4 was completely excluded from the analysis. For the mouse UMAPs, the single-  
1236 cell data were binned at a resolution of 10-kb intervals, while for the zebrafish UMAPs, the  
1237 resolution was 100 kb. Notably, when the first principal components showed a strong  
1238 correlation to sample depth, it was excluded.

1239

### 1240 *Single-cell count enrichment*

1241 [Figures 2B-D](#) show the enrichment of counts in ChIP-seq domains for all single-cell mESC  
1242 samples. The count enrichment is equivalent to the more well-known Fraction Reads in Peaks  
1243 (FRiP) metric, but has been normalized for the expected fraction of counts within the domains  
1244 based on the total number of mappable GATCs covered by these domains. In other words, if  
1245 the domains cover 50% of the mappable GATCs in the genome and we observe that 70% of  
1246 a sample's counts fall within these domains, the count enrichment is  $0.7 / 0.5 = 1.4$ .

1247

## 1248 **Single-cell CELseq data filtering and analyses**

1249 *Filtering CELseq data*

1250 Single-cell data sets were evaluated with respect to the number of unique transcripts,  
1251 percentage mitochondrial reads, percentage ERCC-derived transcripts and the percentage of  
1252 reads coming from unannotated gene models (starting with “AC” or “Gm”) and appropriate  
1253 thresholds were chosen. For the EB data, the used thresholds were  $\geq 1,000$  UMI-unique  
1254 transcripts,  $< 7.5\%$  mitochondrial transcripts,  $< 1\%$  ERCC-derived transcripts, and  $< 5\%$   
1255 transcripts derived from unannotated gene models. In addition, a small group of cells  
1256 ( $29/6,554 \approx 0.4\%$ ) from different time points, which formed a cluster that could not be  
1257 annotated and was characterized by high expression of ribosomal genes, was removed from  
1258 further analyses. For the zebrafish data, the used thresholds were  $\geq 1,000$  UMI-unique  
1259 transcripts and  $< 5\%$  ERCC-derived transcripts. Only genes observed in at least 5 samples  
1260 across the entire dataset were maintained in further analyses. The quality of scDam&T-seq  
1261 samples is determined separately for the DamID readout and the CEL-Seq2 readout. To  
1262 preserve as much of the data as possible, we used all samples passing CEL-Seq2 thresholds  
1263 (independent of DamID quality) for transcriptome-based analyses.

1264

1265 *Analysis of CELseq data with Seurat and Harmony*

1266 Single-cell transcription data was processed using Seurat (v3) (Stuart et al., 2019). First,  
1267 samples were processed using the “NormalizeData”, “FindVariableFeatures”, “ScaleData”,  
1268 and “RunPCA” commands with default parameters. Subsequently, batch effects relating to  
1269 processing batch and plate were removed using Harmony (Korsunsky et al., 2019) using the  
1270 “RunHarmony” command, using a  $\theta=2$  for the batch variable and  $\theta=1$  for the plate  
1271 variable. Clustering and dimensionality reduction were subsequently performed with the  
1272 “FindNeighbors”, “FindClusters” and “RunUMAP” commands. Differentially expressed genes  
1273 per cluster were found using the “FindAllMarkers” command.

1274

1275 *Integration with external single-cell datasets*

1276 The EB data was integrated with part of the single-cell mouse embryo atlas published by  
1277 (Pijuan-Sala et al., 2019). The data was loaded directly into R via the provided R package  
1278 “MouseGastrulationData”. One data set per time point was included (datasets 18, 14, 19, 16,  
1279 17, corresponding to embryonic stages E6.5, E7.0, E7.5, E8.0, E8.5, respectively). The atlas  
1280 data and our own data was integrated using the SCTransform (Hafemeister & Satija, 2019) and  
1281 the anchor-based integration (Stuart et al., 2019) functionalities from Seurat. First, all data  
1282 was normalized per batch using the “SCTransform” command. All data sets were then  
1283 integrated using the “SelectIntegrationFeatures”, “PrepSCTIntegration”,  
1284 “FindIntegrationAnchors”, and “IntegrateData”, as per Seurat documentation.

1285

1286 *SCENIC*

1287 We used SCENIC (Aibar et al., 2017) on the command line according to the documentation  
1288 provided for the python-based scalable version of the tool (pySCENIC) (van de Sande et al.,  
1289 2020). Specifically, we ran “pyscenic grn” with the parameters “--method grnboost2”; “pyscenic  
1290 ctx” with the parameters “--all\_modules”; and “pyscenic aucell” with the default parameters.  
1291 We used the transcription factor annotation and the transcription factor motifs (10 kb +/- of the  
1292 TSS) provided with SCENIC. This yielded 414 activating regulons. We subsequently filtered  
1293 regulons based on the expression of the regulon as a whole (at least 50% of cells having an  
1294 AUCell score > 0 within at least one Seurat cluster) and based on the expression of the regulon  
1295 transcription factor (detected in at least 5% of cells in at least one cluster) to retain only high  
1296 confidence regulons. This resulted in 285 remaining activating regulons. However, repeating  
1297 all analyses with the unfiltered set of regulons yielded the same trends and relationships.

1298

1299 **Linear Discriminant Analysis (LDA) classifier to assign samples to transcriptional**  
1300 **clusters based on DamID signal**

1301 In both the EB results and the zebrafish results, we noticed that there was a substantial  
1302 number of cells that passed DamID thresholds, but that had a poor CEL-Seq2 readout. Since  
1303 most of our analyses rely on the separation of cells in transcriptional clusters (i.e. cell types)  
1304 and cells with a poor CEL-Seq2 readout cannot be included in the clustering, these cells  
1305 cannot be used in downstream DamID-based analyses. However, we noticed that the  
1306 separation of different cell types was recapitulated to a considerable extent in low-  
1307 dimensionality representations of the DamID readout (see the DamID-based UMAPs in [Fig.](#)  
1308 [2A](#) and [Fig. 3D](#)). Since cell-type information is captured in the DamID readout, we reasoned  
1309 that a classifier could be trained based on cells with both good DamID and CEL-Seq2 readouts  
1310 to assign cells with a poor CEL-Seq2 readout to transcriptional clusters based on their DamID  
1311 readout.

1312

1313 To this end, we implemented a Linear Discriminant Analysis (LDA) classifier as described  
1314 below.

1315

1316 *Data input and preprocessing*

1317 As in input for the classifier, we used the binned DamID data of all samples passing DamID  
1318 thresholds and the transcriptional cluster labels of these samples (samples with a poor CEL-  
1319 Seq2 readout had the label “unknown”). The DamID data was depth-normalized (as described  
1320 above) and genomic bins that contained fewer than 1 mappable GATC motif per kb were  
1321 excluded, resulting in a matrix of size  $N \times M$ , where  $N$  is the number of samples and  $M$  is the

1322 number of remaining genomic bins. For the EB data, a bin size of 10 kb was used, while a bin  
1323 size of 100 kb was used for the zebrafish data. Subsequently, the pair-wise correlation was  
1324 computed between all samples, resulting in a correlation matrix of size  $N \times N$ . This  
1325 transformation had two reasons: First, it served as a dimensionality reduction, since  $N \ll M$ .  
1326 Second, it resulted in a data type that effectively describes the similarity of a sample with all  
1327 other samples, including samples without a cluster label. Consequently, during the training  
1328 phase, the classifier can indirectly use the information of these unlabeled samples to learn  
1329 about the overall data structure. We found that using the correlation matrix ( $N \times N$ ) as an input  
1330 for the classifier yielded much better results than using the original matrix ( $N \times M$ ).

1331

1332 To train the LDA classifier, we used two thirds (~66%) of all samples with cluster labels (i.e.  
1333 with a good CEL-Seq2 readout). Since the number of cells per cluster varied extensively, we  
1334 randomly selected two thirds of the samples per cluster and thereby ensured that all clusters  
1335 were represented in both training and testing. The training data thus consisted of the  
1336 correlation matrix of size  $N_{train} \times N$  and a list of sample labels of size  $N_{train}$ , where  $N_{train}$  is the  
1337 number of samples used for training. Consequently, we retained one third (~33%) of labelled  
1338 samples to test the performance of the LDA classifier, consisting of the correlation matrix of  
1339 size  $N_{test} \times N$  and a list of sample labels of size  $N_{test}$ , where  $N_{test}$  is the number of samples used  
1340 for testing. In summary, this split the samples into three groups: one group for training, one  
1341 group for testing, and the group of unlabeled samples.

1342

#### 1343 *Training the classifier*

1344 For the implementation of the LDA classifier, we used the “LinearDiscriminantAnalysis”  
1345 function provided in the Python (v. 3.8.10) scikit-learn toolkit (v. 0.24.2). The number of  
1346 components was set to the number of transcriptional clusters minus one and the LDA classifier  
1347 was trained using the training samples.

1348

#### 1349 *Testing the performance*

1350 To test the performance, the trained LDA classifier was used to predict the labels of the training  
1351 set of samples. Predictions with a probability larger than 0.5 were maintained, while  
1352 predictions with a lower probability were discarded (and the corresponding cells were thus not  
1353 labelled). The predicted labels were subsequently compared to the known labels (Fig. S3E,  
1354 S5.1C). In general, we found a very good performance for clusters with many cells, while the  
1355 performance tended to be lower for clusters with few cells. This is as expected, since the  
1356 number of samples for these clusters was also very low during training.

1357

#### 1358 *Predicting cluster labels for unlabeled samples*

1359 After establishing that the performance was satisfactory, the LDA was retrained, this time  
1360 using all labelled samples. The actual performance on the unlabeled data is likely higher than  
1361 the performance on the test data, since the number of samples used for the final training is  
1362 notably higher. Finally, the cluster labels were predicted for the unlabeled samples. Once  
1363 again, only predictions with a probability higher than 0.5 were maintained. [Figure S3D](#) shows  
1364 the number of EB samples that were attributed to each cluster using the LDA classifier, as  
1365 well as the number of samples that could not be attributed (“unassigned”).

1366

### 1367 **Defining PRC targets**

1368 First, we identified for each gene the region of 5 kb upstream and 3 kb downstream of the  
1369 TSS. Only protein-coding genes and genes for non-coding RNA were considered. When the  
1370 TSS domains of two genes overlapped, they were merged if the overlap was >4 kb, otherwise  
1371 the two domains were split in the middle of the overlap. This resulted in 30,356 domains  
1372 covering a total of 35,814 genes. Subsequently, for all single-cells, the number of observed  
1373 GATC counts within each domain was determined. *In silico* populations per transcriptional  
1374 cluster were generated by combining the counts of all cells belonging to each cluster per  
1375 DamID construct. The *in silico* population counts were subsequently RPKM-normalized, using  
1376 the total number of GATC counts on the somatic chromosomes of the combined single-cell  
1377 samples as the depth (i.e. also counts outside the domains). Normalization for Dam controls  
1378 was performed for the H3K27me3 and RING1B data per transcriptional cluster by adding a  
1379 pseudo count of 1, taking the fold-change with Dam, and performing a log<sub>2</sub>-transformation,  
1380 resulting in log<sub>2</sub> observed-over-expected (log<sub>2</sub>OE) values. The correlation of the resulting  
1381 H3K27me3 and RING1B values per cluster is shown in [Figure S3F](#). We subsequently  
1382 determined PRC targets as those genes that showed H3K27me3 and RING1B log<sub>2</sub>OE values  
1383 >0.35 in at least one cluster. PRC targets were defined based on the *in silico* population of the  
1384 H3K27me3 and RING1B data of the mESC cells ([Fig. 2](#)) and the EB clusters, excluding cluster  
1385 7. Cluster 7 was excluded, because it consisted of relatively few cells and the combined data  
1386 was consequently sparse.

1387

### 1388 **ChromHMM of zebrafish *in silico* populations**

1389 In order to determine regions that were characterized by H3K9me3-enrichment in specific  
1390 (sets of) cell types in the zebrafish embryo, we made use of ChromHMM (v. 1.22) (Ernst & Kellis,  
1391 2012, 2017). As input, we used the *in silico* H3K9me3 signal (log<sub>2</sub>OE) of all clusters that had at  
1392 least 30 cells passing DamID thresholds for both Dam and MPHOSPH8 (clusters 0-11). The  
1393 genome-wide signal at a resolution of 50 kb was used and the values were binarized based  
1394 on a threshold of log<sub>2</sub>OE > 0.35. Bins that had fewer than 1 mappable GATC per kb were  
1395 given a value of 2, indicating that the data was missing. As in all other analysis, chromosome

1396 4 was excluded. The binarized values of clusters 0-11 were provided as input for the  
1397 ChromHMM and the results were computed using the “LearnModel” function using the  
1398 following parameters: -b 50000 -s 1 -pseudo. The number of ChromHMM states was varied  
1399 from 2 to 10 and for each result the differences between the states (based on the emission  
1400 probabilities) were inspected. We found that a ChromHMM model with 5 states was optimal,  
1401 since this yielded the most diverse states and increasing the number of states just added  
1402 redundant states with similar emission probabilities.

1403

#### 1404 **Repeat enrichment in ChromHMM states**

1405 The RepeatMasker repeat annotations for GRCz11 were downloaded from the UCSC  
1406 Genome Browser website (<https://genome.ucsc.edu/>). The enrichment of repeats within each  
1407 ChromHMM state was computed either for repeat classes as a whole (Fig. S5.2A) or for  
1408 individual types of repeats (Fig. 5I and S5.2C). To compute the enrichment of a repeat  
1409 class/type in a ChromHMM state, the fraction of repeats belonging to that class/type that fell  
1410 within the state was computed and normalized for the fraction of the genome covered by that  
1411 state. In other words, if we observe that 70% of a certain repeat falls within state B and state  
1412 B covers 7% of the genome, then the repeat enrichment is  $0.7 / 0.07 = 10$ .

1413

#### 1414 **GO term and PANTHER protein class enrichment analysis**

1415 GO term and PANTHER (Mi et al., 2013) protein class enrichment analyses were performed  
1416 via de Gene Ontology Consortium website (<http://geneontology.org/>). For Figure S4E, the list  
1417 of PRC-regulated TFs was used as a query and the list of all TFs as a reference to determine  
1418 enriched Biological Process GO terms. Only the top 10 most significant terms are shown. For  
1419 Figure S5.1G, the list of genes in ChromHMM state A1 or B was used as a query and the list  
1420 of genes in all ChromHMM states as a reference to determine enriched PANTHER protein  
1421 classes. All hits are shown.

1422

1423



## 1424 References

- 1425 Ahmed, K., Dehghani, H., Rugg-Gunn, P., Fussner, E., Rossant, J., & Bazett-Jones, D. P. (2010). Global Chromatin  
1426 Architecture Reflects Pluripotency and Lineage Commitment in the Early Mouse Embryo. *PLOS ONE*, *5*(5),  
1427 e10531. <https://doi.org/10.1371/JOURNAL.PONE.0010531>
- 1428 Ai, S., Xiong, H., Li, C. C., Luo, Y., Shi, Q., Liu, Y., Yu, X., Li, C., & He, A. (2019). Profiling chromatin states using  
1429 single-cell HiChIP-seq. *Nature Cell Biology*, *21*(9), 1164–1172. <https://doi.org/10.1038/s41556-019-0383-5>
- 1430 Aibar, S., González-Blas, C. B., Moerman, T., Huynh-Thu, V. A., Imrichova, H., Hulselmans, G., Rambow, F.,  
1431 Marine, J. C., Geurts, P., Aerts, J., van den Oord, J., Atak, Z. K., Wouters, J., & Aerts, S. (2017). SCENIC:  
1432 Single-cell regulatory network inference and clustering. *Nature Methods*, *14*(11), 1083–1086.  
1433 <https://doi.org/10.1038/nmeth.4463>
- 1434 Aleström, P., D'Angelo, L., Midtlyng, P. J., Schorderet, D. F., Schulte-Merker, S., Sohm, F., & Warner, S. (2019).  
1435 Zebrafish: Housing and husbandry recommendations: <https://doi.org/10.1177/0023677219869037>,  
1436 *Org.Proxy.Library.Uu.Nl*, *54*(3), 213–224.  
1437 <https://doi.org/10.1177/0023677219869037>
- 1438 Altemose, N., Maslan, A., Rios-Martinez, C., Lai, A., White, J. A., & Streets, A. (2020).  $\mu$ DamID: A Microfluidic  
1439 Approach for Joint Imaging and Sequencing of Protein-DNA Interactions in Single Cells. *Cell Systems*, *11*(4),  
1440 354-366.e9. <https://doi.org/10.1016/j.cels.2020.08.015>
- 1441 Amendola, M., Venneri, M. A., Biffi, A., Vigna, E., & Naldini, L. (2005). Coordinate dual-gene transgenesis by  
1442 lentiviral vectors carrying synthetic bidirectional promoters. *Nature Biotechnology* *23*:1, *23*(1), 108–  
1443 116. <https://doi.org/10.1038/NBT1049>
- 1444 Anders, S., Pyl, P. T., & Huber, W. (2015). HTSeq—a Python framework to work with high-throughput sequencing  
1445 data. *Bioinformatics*, *31*(2), 166–169. <https://doi.org/10.1093/BIOINFORMATICS/BTU638>
- 1446 Angermueller, C., Clark, S. J., Lee, H. J., Macaulay, I. C., Teng, M. J., Hu, T. X., Krueger, F., Smallwood, S. A.,  
1447 Ponting, C. P., Voet, T., Kelsey, G., Stegle, O., & Reik, W. (2016). Parallel single-cell sequencing links  
1448 transcriptional and epigenetic heterogeneity. *Nature Methods*, *13*(3), 229–232.  
1449 <https://doi.org/10.1038/nmeth.3728>
- 1450 Argelaguet, R., Clark, S. J., Mohammed, H., Stapel, L. C., Krueger, C., Kapourani, C. A., Imaz-Rosshandler, I.,  
1451 Lohoff, T., Xiang, Y., Hanna, C. W., Smallwood, S., Ibarra-Soria, X., Buettner, F., Sanguinetti, G., Xie, W.,  
1452 Krueger, F., Göttgens, B., Rugg-Gunn, P. J., Kelsey, G., ... Reik, W. (2019). Multi-omics profiling of mouse  
1453 gastrulation at single-cell resolution. *Nature*, *576*(7787), 487–491. <https://doi.org/10.1038/s41586-019-1825-8>
- 1454
- 1455 Aughey, G. N., Cheetham, S. W., & Southall, T. D. (2019). DamID as a versatile tool for understanding gene  
1456 regulation. *Development*, *146*(6). <https://doi.org/10.1242/DEV.173666>
- 1457 Blackledge, N. P., & Klose, R. J. (2021). The molecular principles of gene regulation by Polycomb repressive  
1458 complexes. *Nature Reviews Molecular Cell Biology*, *0123456789*. <https://doi.org/10.1038/s41580-021-00398-y>
- 1459
- 1460 Borsos, M., Perricone, S. M., Schauer, T., Pontabry, J., de Luca, K. L., de Vries, S. S., Ruiz-Morales, E. R., Torres-  
1461 Padilla, M. E., & Kind, J. (2019). Genome–lamina interactions are established de novo in the early mouse  
1462 embryo. In *Nature* (Vol. 569, Issue 7758, pp. 729–733). Nature Publishing Group.  
1463 <https://doi.org/10.1038/s41586-019-1233-0>

- 1464 Boyer, L. A., Plath, K., Zeitlinger, J., Brambrink, T., Medeiros, L. A., Lee, T. I., Levine, S. S., Wernig, M., Tajonar, A.,  
1465 Ray, M. K., Bell, G. W., Otte, A. P., Vidal, M., Gifford, D. K., Young, R. A., & Jaenisch, R. (2006). Polycomb  
1466 complexes repress developmental regulators in murine embryonic stem cells. *Nature* 2006 441:7091,  
1467 441(7091), 349–353. <https://doi.org/10.1038/nature04733>
- 1468 Bulut-Karslioglu, A., DeLaRosa-Velázquez, I. A., Ramirez, F., Barenboim, M., Onishi-Seebacher, M., Arand, J.,  
1469 Galán, C., Winter, G. E., Engist, B., Gerle, B., O’Sullivan, R. J., Martens, J. H. A., Walter, J., Manke, T., Lachner,  
1470 M., & Jenuwein, T. (2014). Suv39h-Dependent H3K9me3 Marks Intact Retrotransposons and Silences LINE  
1471 Elements in Mouse Embryonic Stem Cells. *Molecular Cell*, 55(2), 277–290.  
1472 <https://doi.org/10.1016/J.MOLCEL.2014.05.029>
- 1473 Cao, J., Cusanovich, D. A., Ramani, V., Aghamirzaie, D., Pliner, H. A., Hill, A. J., Daza, R. M., McFaline-Figueroa, J.  
1474 L., Packer, J. S., Christiansen, L., Steemers, F. J., Adey, A. C., Trapnell, C., & Shendure, J. (2018). Joint  
1475 profiling of chromatin accessibility and gene expression in thousands of single cells. *Science*, 361(6409),  
1476 1380–1385. <https://doi.org/10.1126/SCIENCE.AAU0730>
- 1477 Cao, R., Wang, L., Wang, H., Xia, L., Erdjument-Bromage, H., Tempst, P., Jones, R. S., & Zhang, Y. (2002). Role of  
1478 histone H3 lysine 27 methylation in polycomb-group silencing. *Science*, 298(5595), 1039–1043.  
1479 <https://doi.org/10.1126/SCIENCE.1076997>
- 1480 Chandra, T., Kirschner, K., Thuret, J.-Y., Pope, B. D., Ryba, T., Newman, S., Ahmed, K., Samarajiwa, S. A., Salama,  
1481 R., Carroll, T., Stark, R., Janky, R., Narita, M., Xue, L., Chicas, A., Núñez, S., Janknecht, R., Hayashi-Takanaka,  
1482 Y., Wilson, M. D., ... Narita, M. (2012). Independence of Repressive Histone Marks and Chromatin  
1483 Compaction during Senescent Heterochromatic Layer Formation. *Molecular Cell*, 47(2), 203–214.  
1484 <https://doi.org/10.1016/J.MOLCEL.2012.06.010>
- 1485 Cheetham, S. W., Jafrani, Y. M. A., Andersen, S. B., Jansz, N., Ewing, A. D., & Faulkner, G. J. (2021). Single-molecule  
1486 simultaneous profiling of DNA methylation and DNA-protein interactions with Nanopore-DamID. *BioRxiv*,  
1487 2021.08.09.455753. <https://doi.org/10.1101/2021.08.09.455753>
- 1488 Clark, S. J., Argelaguet, R., Kapourani, C. A., Stubbs, T. M., Lee, H. J., Alda-Catalinas, C., Krueger, F., Sanguinetti,  
1489 G., Kelsey, G., Marioni, J. C., Stegle, O., & Reik, W. (2018). ScNMT-seq enables joint profiling of chromatin  
1490 accessibility DNA methylation and transcription in single cells e. *Nature Communications*, 9(1), 1–9.  
1491 <https://doi.org/10.1038/s41467-018-03149-4>
- 1492 Collas, P. (2011). A Chromatin Immunoprecipitation Protocol for Small Cell Numbers. *Methods in Molecular*  
1493 *Biology*, 791, 179–193. [https://doi.org/10.1007/978-1-61779-316-5\\_14](https://doi.org/10.1007/978-1-61779-316-5_14)
- 1494 Corallo, D., Trapani, V., & Bonaldo, P. (2015). The notochord: structure and functions. *Cellular and Molecular Life*  
1495 *Sciences* 2015 72:16, 72(16), 2989–3008. <https://doi.org/10.1007/S00018-015-1897-Z>
- 1496 Crisp, M., Liu, Q., Roux, K., Rattner, J. B., Shanahan, C., Burke, B., Stahl, P. D., & Hodzic, D. (2006). Coupling of  
1497 the nucleus and cytoplasm: Role of the LINC complex. *Journal of Cell Biology*, 172(1), 41–53.  
1498 <https://doi.org/10.1083/JCB.200509124>
- 1499 Czermin, B., Melfi, R., McCabe, D., Seitz, V., Imhof, A., & Pirrotta, V. (2002). Drosophila Enhancer of Zeste/ESC  
1500 Complexes Have a Histone H3 Methyltransferase Activity that Marks Chromosomal Polycomb Sites. *Cell*,  
1501 111(2), 185–196. [https://doi.org/10.1016/S0092-8674\(02\)00975-3](https://doi.org/10.1016/S0092-8674(02)00975-3)
- 1502 Davis, C. A., Hitz, B. C., Sloan, C. A., Chan, E. T., Davidson, J. M., Gabdank, I., Hilton, J. A., Jain, K., Baymuradov,  
1503 U. K., Narayanan, A. K., Onate, K. C., Graham, K., Miyasato, S. R., Dreszer, T. R., Strattan, J. S., Jolanki, O.,  
1504 Tanaka, F. Y., & Cherry, J. M. (2018). The Encyclopedia of DNA elements (ENCODE): data portal update.  
1505 *Nucleic Acids Research*, 46(D1), D794–D801. <https://doi.org/10.1093/NAR/GKX1081>

- 1506 de Luca, K. L., & Kind, J. (2021). Single-cell damid to capture contacts between dna and the nuclear lamina in  
1507 individual mammalian cells. In *Methods in Molecular Biology* (Vol. 2157, pp. 159–172). Humana, New York,  
1508 NY. [https://doi.org/10.1007/978-1-0716-0664-3\\_9](https://doi.org/10.1007/978-1-0716-0664-3_9)
- 1509 de Napoles, M., Mermoud, J. E., Wakao, R., Tang, Y. A., Endoh, M., Appanah, R., Nesterova, T. B., Silva, J., Otte,  
1510 A. P., Vidal, M., Koseki, H., & Brockdorff, N. (2004). Polycomb Group Proteins Ring1A/B Link Ubiquitylation  
1511 of Histone H2A to Heritable Gene Silencing and X Inactivation. *Developmental Cell*, 7(5), 663–676.  
1512 <https://doi.org/10.1016/J.DEVCEL.2004.10.005>
- 1513 Desbaillets, I., Ziegler, U., Groscurth, P., & Gassmann, M. (2000). Embryoid bodies: an in vitro model of mouse  
1514 embryogenesis. *Experimental Physiology*, 85(6), 645–651. <https://doi.org/10.1111/J.1469-445X.2000.02104.X>
- 1516 Donnalaja, F., Carnevali, F., Jacchetti, E., & Raimondi, M. T. (2020). Lamin A/C Mechanotransduction in  
1517 Laminopathies. *Cells 2020, Vol. 9, Page 1306*, 9(5), 1306. <https://doi.org/10.3390/CELLS9051306>
- 1518 Ernst, J., & Kellis, M. (2012). ChromHMM: Automating chromatin-state discovery and characterization. *Nature*  
1519 *Methods*, 9(3), 215–216. <https://doi.org/10.1038/nmeth.1906>
- 1520 Ernst, J., & Kellis, M. (2017). Chromatin-state discovery and genome annotation with ChromHMM. *Nature*  
1521 *Protocols*, 12(12), 2478–2492. <https://doi.org/10.1038/nprot.2017.124>
- 1522 Filion, G. J., van Bommel, J. G., Braunschweig, U., Talhout, W., Kind, J., Ward, L. D., Brugman, W., de Castro, I. J.,  
1523 Kerkhoven, R. M., Bussemaker, H. J., & van Steensel, B. (2010). Systematic Protein Location Mapping  
1524 Reveals Five Principal Chromatin Types in Drosophila Cells. *Cell*, 143(2), 212–224.  
1525 <https://doi.org/10.1016/j.cell.2010.09.009>
- 1526 Gorkin, D. U., Barozzi, I., Zhao, Y., Zhang, Y., Huang, H., Lee, A. Y., Li, B., Chiou, J., Wildberg, A., Ding, B., Zhang,  
1527 B., Wang, M., Strattan, J. S., Davidson, J. M., Qiu, Y., Afzal, V., Akiyama, J. A., Plajzer-Frick, I., Novak, C. S.,  
1528 ... Ren, B. (2020). An atlas of dynamic chromatin landscapes in mouse fetal development. *Nature*,  
1529 583(7818), 744–751. <https://doi.org/10.1038/s41586-020-2093-3>
- 1530 Gruenbaum, Y., & Foisner, R. (2015). Lamins: Nuclear Intermediate Filament Proteins with Fundamental  
1531 Functions in Nuclear Mechanics and Genome Regulation. <Http://Dx.Doi.Org.Proxy.Library.Uu.Nl/10.1146/Annurev-Biochem-060614-034115>, 84, 131–164.  
1532 <https://doi.org/10.1146/ANNUREV-BIOCHEM-060614-034115>
- 1534 Hafemeister, C., & Satija, R. (2019). Normalization and variance stabilization of single-cell RNA-seq data using  
1535 regularized negative binomial regression. *Genome Biology*, 20(1). <https://doi.org/10.1186/s13059-019-1874-1>
- 1537 Hahn, M. A., Wu, X., Li, A. X., Hahn, T., & Pfeifer, G. P. (2011). Relationship between Gene Body DNA Methylation  
1538 and Intragenic H3K9me3 and H3K36me3 Chromatin Marks. *PLOS ONE*, 6(4), e18844.  
1539 <https://doi.org/10.1371/JOURNAL.PONE.0018844>
- 1540 Hainer, S. J., Bošković, A., McCannell, K. N., Rando, O. J., & Fazio, T. G. (2019). Profiling of Pluripotency Factors  
1541 in Single Cells and Early Embryos. *Cell*, 177(5), 1319–1329.e11. <https://doi.org/10.1016/j.cell.2019.03.014>
- 1542 Harada, A., Maehara, K., Handa, T., Arimura, Y., Nogami, J., Hayashi-Takanaka, Y., Shirahige, K., Kurumizaka, H.,  
1543 Kimura, H., & Ohkawa, Y. (2019). A chromatin integration labelling method enables epigenomic profiling  
1544 with lower input. *Nature Cell Biology*, 21(2), 287–296. <https://doi.org/10.1038/s41556-018-0248-3>

- 1545 Harmanci, A., Rozowsky, J., & Gerstein, M. (2014). MUSIC: identification of enriched regions in ChIP-Seq  
1546 experiments using a mappability-corrected multiscale signal processing framework. *Genome Biology*,  
1547 *15*(10), 474. <https://doi.org/10.1186/s13059-014-0474-3>
- 1548 Hashimshony, T., Senderovich, N., Avital, G., Klochendler, A., de Leeuw, Y., Anavy, L., Gennert, D., Li, S., Livak, K.  
1549 J., Rozenblatt-Rosen, O., Dor, Y., Regev, A., & Yanai, I. (2016). CEL-Seq2: Sensitive highly-multiplexed single-  
1550 cell RNA-Seq. *Genome Biology*, *17*(1), 1–7. <https://doi.org/10.1186/s13059-016-0938-8>
- 1551 Hirota, T., Lipp, J. J., Toh, B.-H., & Peters, J.-M. (2005). Histone H3 serine 10 phosphorylation by Aurora B causes  
1552 HP1 dissociation from heterochromatin. *Nature* *2005* *438*:7071, *438*(7071), 1176–1180.  
1553 <https://doi.org/10.1038/NATURE04254>
- 1554 Juan, A. H., Wang, S., Ko, K. D., Zare, H., Tsai, P. F., Feng, X., Vivanco, K. O., Ascoli, A. M., Gutierrez-Cruz, G., Krebs,  
1555 J., Sidoli, S., Knight, A. L., Pedersen, R. A., Garcia, B. A., Casellas, R., Zou, J., & Sartorelli, V. (2016). Roles of  
1556 H3K27me2 and H3K27me3 Examined during Fate Specification of Embryonic Stem Cells. *Cell Reports*,  
1557 *17*(5), 1369–1382. <https://doi.org/10.1016/J.CELREP.2016.09.087>
- 1558 Kim, D., Pertea, G., Trapnell, C., Pimentel, H., Kelley, R., & Salzberg, S. L. (2013). TopHat2: accurate alignment of  
1559 transcriptomes in the presence of insertions, deletions and gene fusions. *Genome Biology* *2013* *14*:4, *14*(4),  
1560 1–13. <https://doi.org/10.1186/GB-2013-14-4-R36>
- 1561 Kind, J., Pagie, L., de Vries, S. S., Nahidiazar, L., Dey, S. S., Bienko, M., Zhan, Y., Lajoie, B., de Graaf, C. A.,  
1562 Amendola, M., Fudenberg, G., Imakaev, M., Mirny, L. A., Jalink, K., Dekker, J., van Oudenaarden, A., & van  
1563 Steensel, B. (2015). Genome-wide Maps of Nuclear Lamina Interactions in Single Human Cells. *Cell*, *163*(1),  
1564 134–147. <https://doi.org/10.1016/j.cell.2015.08.040>
- 1565 Kind, J., Pagie, L., Ortazobkoyun, H., Boyle, S., de Vries, S. S., Janssen, H., Amendola, M., Nolen, L. D., Bickmore,  
1566 W. A., & van Steensel, B. (2013). Single-Cell Dynamics of Genome-Nuclear Lamina Interactions. *Cell*, *153*(1),  
1567 178–192. <https://doi.org/10.1016/J.CELL.2013.02.028>
- 1568 Korsunsky, I., Millard, N., Fan, J., Slowikowski, K., Zhang, F., Wei, K., Baglaenko, Y., Brenner, M., Loh, P. ru, &  
1569 Raychaudhuri, S. (2019). Fast, sensitive and accurate integration of single-cell data with Harmony. *Nature*  
1570 *Methods*, *16*(12), 1289–1296. <https://doi.org/10.1038/s41592-019-0619-0>
- 1571 Ku, W. L., Nakamura, K., Gao, W., Cui, K., Hu, G., Tang, Q., Ni, B., & Zhao, K. (2019). Single-cell chromatin  
1572 immunocleavage sequencing (scChIC-seq) to profile histone modification. *Nature Methods*, *16*(4), 323–  
1573 325. <https://doi.org/10.1038/s41592-019-0361-7>
- 1574 Kubota, T., Nishimura, K., Kanemaki, M. T., & Donaldson, A. D. (2013). The Elg1 Replication Factor C-like Complex  
1575 Functions in PCNA Unloading during DNA Replication. *Molecular Cell*, *50*(2), 273–280.  
1576 <https://doi.org/10.1016/J.MOLCEL.2013.02.012>
- 1577 Kungulovski, G., Kycia, I., Tamas, R., Jurkowska, R. Z., Kudithipudi, S., Henry, C., Reinhardt, R., Labhart, P., &  
1578 Jeltsch, A. (2014). Application of histone modification-specific interaction domains as an alternative to  
1579 antibodies. *Genome Research*, *24*(11), 1842–1853. <https://doi.org/10.1101/gr.170985.113>
- 1580 Kungulovski, G., Mauser, R., Reinhardt, R., & Jeltsch, A. (2016). Application of recombinant TAF3 PHD domain  
1581 instead of anti-H3K4me3 antibody. *Epigenetics and Chromatin*, *9*(1). <https://doi.org/10.1186/s13072-016-0061-9>  
1582
- 1583 Kuzmichev, A., Nishioka, K., Erdjument-Bromage, H., Tempst, P., & Reinberg, D. (2002). Histone  
1584 methyltransferase activity associated with a human multiprotein complex containing the Enhancer of  
1585 Zeste protein. *Genes & Development*, *16*(22), 2893–2905. <https://doi.org/10.1101/GAD.1035902>

- 1586 Langmead, B., & Salzberg, S. L. (2012). Fast gapped-read alignment with Bowtie 2. *Nature Methods* 2012 9:4,  
1587 9(4), 357–359. <https://doi.org/10.1038/nmeth.1923>
- 1588 Laue, K., Rajshekar, S., Courtney, A. J., Lewis, Z. A., & Goll, M. G. (2019). The maternal to zygotic transition  
1589 regulates genome-wide heterochromatin establishment in the zebrafish embryo. *Nature Communications*,  
1590 10(1). <https://doi.org/10.1038/s41467-019-09582-3>
- 1591 Lawson, N. D., Li, R., Shin, M., Grosse, A., Onur, Y. M. S., Stone, O. A., Kucukural, A., & Zhu, L. J. (2020). An  
1592 improved zebrafish transcriptome annotation for sensitive and comprehensive detection of cell type-  
1593 specific genes. *ELife*, 9, 1–76. <https://doi.org/10.7554/ELIFE.55792>
- 1594 Li, J., Witten, D. M., Johnstone, I. M., & Tibshirani, R. (2012). Normalization, testing, and false discovery rate  
1595 estimation for RNA-sequencing data. *Biostatistics*, 13(3), 523–538.  
1596 <https://doi.org/10.1093/biostatistics/kxr031>
- 1597 Liu, S., Brind'Amour, J., Karimi, M. M., Shirane, K., Bogutz, A., Lefebvre, L., Sasaki, H., Shinkai, Y., & Lorincz, M. C.  
1598 (2014). Setdb1 is required for germline development and silencing of H3K9me3-marked endogenous  
1599 retroviruses in primordial germ cells. *Genes & Development*, 28(18), 2041–2055.  
1600 <https://doi.org/10.1101/GAD.244848.114>
- 1601 Liu, W., Tanasa, B., Tyurina, O. v., Zhou, T. Y., Gassmann, R., Liu, W. T., Ohgi, K. A., Benner, C., Garcia-Bassets, I.,  
1602 Aggarwal, A. K., Desai, A., Dorrestein, P. C., Glass, C. K., & Rosenfeld, M. G. (2010). PHF8 mediates histone  
1603 H4 lysine 20 demethylation events involved in cell cycle progression. *Nature* 2010 466:7305, 466(7305),  
1604 508–512. <https://doi.org/10.1038/NATURE09272>
- 1605 Markodimitraki, C. M., Rang, F. J., Rooijers, K., de Vries, S. S., Chialastri, A., de Luca, K. L., Lochs, S. J. A., Mooijman,  
1606 D., Dey, S. S., & Kind, J. (2020). Simultaneous quantification of protein–DNA interactions and  
1607 transcriptomes in single cells with scDam&T-seq. *Nature Protocols*, 15(6), 1922–1953.  
1608 <https://doi.org/10.1038/s41596-020-0314-8>
- 1609 Marshall, O. J., & Brand, A. H. (2017). Chromatin state changes during neural development revealed by in vivo  
1610 cell-type specific profiling. *Nature Communications*, 8(1), 1–9. <https://doi.org/10.1038/s41467-017-02385-4>
- 1612 Mi, H., Muruganujan, A., Casagrande, J. T., & Thomas, P. D. (2013). Large-scale gene function analysis with the  
1613 PANTHER classification system. *Nature Protocols* 2013 8:8, 8(8), 1551–1566.  
1614 <https://doi.org/10.1038/nprot.2013.092>
- 1615 Mosch, K., Franz, H., Soeroes, S., Singh, P. B., & Fischle, W. (2011). HP1 Recruits Activity-Dependent  
1616 Neuroprotective Protein to H3K9me3 Marked Pericentromeric Heterochromatin for Silencing of Major  
1617 Satellite Repeats. *PLOS ONE*, 6(1), e15894. <https://doi.org/10.1371/JOURNAL.PONE.0015894>
- 1618 Moudgil, A., Wilkinson, M. N., Chen, X., He, J., Cammack, A. J., Vasek, M. J., Lagunas, T., Qi, Z., Lalli, M. A., Guo,  
1619 C., Morris, S. A., Dougherty, J. D., & Mitra, R. D. (2020). Self-Reporting Transposons Enable  
1620 Simultaneous Readout of Gene Expression and Transcription Factor Binding in Single Cells. *Cell*, 992–1008.  
1621 <https://doi.org/10.1016/j.cell.2020.06.037>
- 1622 Müller, J., Hart, C. M., Francis, N. J., Vargas, M. L., Sengupta, A., Wild, B., Miller, E. L., O'Connor, M. B., Kingston,  
1623 R. E., & Simon, J. A. (2002). Histone Methyltransferase Activity of a Drosophila Polycomb Group Repressor  
1624 Complex. *Cell*, 111(2), 197–208. [https://doi.org/10.1016/S0092-8674\(02\)00976-5](https://doi.org/10.1016/S0092-8674(02)00976-5)
- 1625 Mutlu, B., Chen, H. M., Moresco, J. J., Orelo, B. D., Yang, B., Gaspar, J. M., Keppler-Ross, S., Yates, J. R., Hall, D.  
1626 H., Maine, E. M., & Mango, S. E. (2018). Regulated nuclear accumulation of a histone methyltransferase

- 1627 times the onset of heterochromatin formation in *C. elegans* embryos. *Science Advances*, 4(8), 6224–6246.  
1628 <https://doi.org/10.1126/SCIADV.AAT6224>
- 1629 Nava, M. M., Miroshnikova, Y. A., Biggs, L. C., Whitefield, D. B., Metge, F., Boucas, J., Vihinen, H., Jokitalo, E., Li,  
1630 X., García Arcos, J. M., Hoffmann, B., Merkel, R., Niessen, C. M., Dahl, K. N., & Wickström, S. A. (2020).  
1631 Heterochromatin-Driven Nuclear Softening Protects the Genome against Mechanical Stress-Induced  
1632 Damage. *Cell*, 181(4), 800-817.e22. <https://doi.org/10.1016/J.CELL.2020.03.052>
- 1633 Nicetto, D., Donahue, G., Jain, T., Peng, T., Sidoli, S., Sheng, L., Montavon, T., Becker, J. S., Grindheim, J. M.,  
1634 Blahnik, K., Garcia, B. A., Tan, K., Bonasio, R., Jenuwein, T., & Zaret, K. S. (2019). H3K9me3-heterochromatin  
1635 loss at protein-coding genes enables developmental lineage specification. *Science*, 363(6424), 294–297.  
1636 <https://doi.org/10.1126/SCIENCE.AAU0583>
- 1637 Nishimura, K., Fukagawa, T., Takisawa, H., Kakimoto, T., & Kanemaki, M. (2009). An auxin-based degron system  
1638 for the rapid depletion of proteins in nonplant cells. *Nature Methods* 2009 6:12, 6(12), 917–922.  
1639 <https://doi.org/10.1038/NMETH.1401>
- 1640 Nora, E. P., Goloborodko, A., Valton, A. L., Gibcus, J. H., Uebersohn, A., Abdennur, N., Dekker, J., Mirny, L. A., &  
1641 Bruneau, B. G. (2017). Targeted Degradation of CTCF Decouples Local Insulation of Chromosome Domains  
1642 from Genomic Compartmentalization. *Cell*, 169(5), 930-944.e22.  
1643 <https://doi.org/10.1016/J.CELL.2017.05.004>
- 1644 Pal, M., Kind, J., & Torres-Padilla, M.-E. (2021). DamID to Map Genome-Protein Interactions in Preimplantation  
1645 Mouse Embryos. *Methods in Molecular Biology*, 2214, 265–282. [https://doi.org/10.1007/978-1-0716-0958-3\\_18](https://doi.org/10.1007/978-1-0716-0958-3_18)  
1646
- 1647 Park, M., Patel, N., Keung, A. J., & Khalil, A. S. (2018). Construction of a Synthetic, Chromatin-Based Epigenetic  
1648 System in Human Cells. *Ssrn*. <https://doi.org/10.2139/ssrn.3155804>
- 1649 Park, M., Patel, N., Keung, A. J., & Khalil, A. S. (2019). Engineering Epigenetic Regulation Using Synthetic Read-  
1650 Write Modules. *Cell*, 176(1–2), 227-238.e20. <https://doi.org/10.1016/j.cell.2018.11.002>
- 1651 Pengelly, A. R., Copur, Ö., Jäckle, H., Herzig, A., & Müller, J. (2013). A histone mutant reproduces the phenotype  
1652 caused by loss of histone-modifying factor polycomb. *Science*, 339(6120), 698–699.  
1653 <https://doi.org/10.1126/SCIENCE.1231382>
- 1654 Pijuan-Sala, B., Griffiths, J. A., Guibentif, C., Hiscock, T. W., Jawaid, W., Calero-Nieto, F. J., Mulas, C., Ibarra-Soria,  
1655 X., Tyser, R. C. V., Ho, D. L. L., Reik, W., Srinivas, S., Simons, B. D., Nichols, J., Marioni, J. C., & Göttgens, B.  
1656 (2019). A single-cell molecular map of mouse gastrulation and early organogenesis. *Nature*, 566(7745),  
1657 490–495. <https://doi.org/10.1038/s41586-019-0933-9>
- 1658 Piunti, A., & Shilatifard, A. (2021). The roles of Polycomb repressive complexes in mammalian development and  
1659 cancer. *Nature Reviews Molecular Cell Biology* 2021 22:5, 22(5), 326–345.  
1660 <https://doi.org/10.1038/S41580-021-00341-1>
- 1661 Ramírez, F., Ryan, D. P., Grüning, B., Bhardwaj, V., Kilpert, F., Richter, A. S., Heyne, S., Dündar, F., & Manke, T.  
1662 (2016). deepTools2: a next generation web server for deep-sequencing data analysis. *Nucleic Acids*  
1663 *Research*, 44(W1), W160–W165. <https://doi.org/10.1093/NAR/GKW257>
- 1664 Riising, E. M., Comet, I., Leblanc, B., Wu, X., Johansen, J. V., & Helin, K. (2014). Gene Silencing Triggers Polycomb  
1665 Repressive Complex 2 Recruitment to CpG Islands Genome Wide. *Molecular Cell*, 55(3), 347–360.  
1666 <https://doi.org/10.1016/J.MOLCEL.2014.06.005>

- 1667 Rogakou, E. P., Pilch, D. R., Orr, A. H., Ivanova, V. S., & Bonner, W. M. (1998). DNA Double-stranded Breaks Induce  
1668 Histone H2AX Phosphorylation on Serine 139 \*. *Journal of Biological Chemistry*, 273(10), 5858–5868.  
1669 <https://doi.org/10.1074/JBC.273.10.5858>
- 1670 Rooijers, K., Markodimitraki, C. M., Rang, F. J., de Vries, S. S., Chialastri, A., de Luca, K. L., Mooijman, D., Dey, S.  
1671 S., & Kind, J. (2019). Simultaneous quantification of protein–DNA contacts and transcriptomes in single  
1672 cells. *Nature Biotechnology*. <https://doi.org/10.1038/s41587-019-0150-y>
- 1673 Rotem, A., Ram, O., Shores, N., Sperling, R. A., Goren, A., Weitz, D. A., & Bernstein, B. E. (2015). Single-cell ChIP-  
1674 seq reveals cell subpopulations defined by chromatin state. *Nature Biotechnology* 2015 33:11, 33(11),  
1675 1165–1172. <https://doi.org/10.1038/NBT.3383>
- 1676 Rudolph, T., Yonezawa, M., Lein, S., Heidrich, K., Kubicek, S., Schäfer, C., Phalke, S., Walther, M., Schmidt, A.,  
1677 Jenuwein, T., & Reuter, G. (2007). Heterochromatin Formation in Drosophila Is Initiated through Active  
1678 Removal of H3K4 Methylation by the LSD1 Homolog SU(VAR)3-3. *Molecular Cell*, 26(1), 103–115.  
1679 <https://doi.org/10.1016/J.MOLCEL.2007.02.025>
- 1680 Sanders, S. L., Portoso, M., Mata, J., Bähler, J., Allshire, R. C., & Kouzarides, T. (2004). Methylation of Histone H4  
1681 Lysine 20 Controls Recruitment of Crb2 to Sites of DNA Damage. *Cell*, 119(5), 603–614.  
1682 <https://doi.org/10.1016/J.CELL.2004.11.009>
- 1683 Santos, F., Peters, A. H., Otte, A. P., Reik, W., & Dean, W. (2005). Dynamic chromatin modifications characterise  
1684 the first cell cycle in mouse embryos. *Developmental Biology*, 280(1), 225–236.  
1685 <https://doi.org/10.1016/J.YDBIO.2005.01.025>
- 1686 Sato, Y., Kujirai, T., Arai, R., Asakawa, H., Ohtsuki, C., Horikoshi, N., Yamagata, K., Ueda, J., Nagase, T., Haraguchi,  
1687 T., Hiraoka, Y., Kimura, A., Kurumizaka, H., & Kimura, H. (2016). A Genetically Encoded Probe for Live-Cell  
1688 Imaging of H4K20 Monomethylation. *Journal of Molecular Biology*, 428(20), 3885–3902.  
1689 <https://doi.org/10.1016/j.jmb.2016.08.010>
- 1690 Sato, Y., Mukai, M., Ueda, J., Muraki, M., Stasevich, T. J., Horikoshi, N., Kujirai, T., Kita, H., Kimura, T., Hira, S.,  
1691 Okada, Y., Hayashi-Takanaka, Y., Obuse, C., Kurumizaka, H., Kawahara, A., Yamagata, K., Nozaki, N., &  
1692 Kimura, H. (2013). Genetically encoded system to track histone modification in vivo. *Scientific Reports*, 3.  
1693 <https://doi.org/10.1038/srep02436>
- 1694 Sato, Y., Nakao, M., & Kimura, H. (2021). Live-cell imaging probes to track chromatin modification dynamics.  
1695 *Microscopy*, 0, 1–8. <https://doi.org/10.1093/JMICRO/DFAB030>
- 1696 Schaik, T. van, Vos, M., Peric-Hupkes, D., Celie, P. H., & Steensel, B. van. (2020). Cell cycle dynamics of lamina-  
1697 associated DNA. *EMBO Reports*, 21(11), e50636. <https://doi.org/10.15252/EMBR.202050636>
- 1698 Schmid, M., Durussel, T., & Laemmli, U. K. (2004). ChIC and ChEC; genomic mapping of chromatin proteins.  
1699 *Molecular Cell*, 16(1), 147–157. <https://doi.org/10.1016/j.molcel.2004.09.007>
- 1700 Shoaib, M., Chen, Q., Shi, X., Nair, N., Prasanna, C., Yang, R., Walter, D., Frederiksen, K. S., Einarsson, H.,  
1701 Svensson, J. P., Liu, C. F., Ekwall, K., Lerdrup, M., Nordenskiöld, L., & Sørensen, C. S. (2021). Histone H4  
1702 lysine 20 mono-methylation directly facilitates chromatin openness and promotes transcription of  
1703 housekeeping genes. *Nature Communications*, 12(1), 1–16. <https://doi.org/10.1038/s41467-021-25051-2>
- 1704 Skene, P. J., & Henikoff, S. (2017). An efficient targeted nuclease strategy for high-resolution mapping of DNA  
1705 binding sites. *ELife*, 6, 1–35. <https://doi.org/10.7554/eLife.21856>

- 1706 Southall, T. D., Gold, K. S., Egger, B., Davidson, C. M., Caygill, E. E., Marshall, O. J., & Brand, A. H. (2013). Cell-  
1707 type-specific profiling of gene expression and chromatin binding without cell isolation: Assaying RNA pol  
1708 II occupancy in neural stem cells. *Developmental Cell*, 26(1), 101–112.  
1709 <https://doi.org/10.1016/j.devcel.2013.05.020>
- 1710 Stephens, A. D., Liu, P. Z., Banigan, E. J., Almassalha, L. M., Backman, V., Adam, S. A., Goldman, R. D., & Marko,  
1711 J. F. (2018). Chromatin histone modifications and rigidity affect nuclear morphology independent of  
1712 lamins. <https://doi.org/10.1091/Mbc.E17-06-0410>, 29(2), 220–233. <https://doi.org/10.1091/MBC.E17-06-0410>
- 1714 Stuart, T., Butler, A., Hoffman, P., Hafemeister, C., Papalexi, E., Mauck, W. M., Hao, Y., Stoeckius, M., Smibert,  
1715 P., & Satija, R. (2019). Comprehensive Integration of Single-Cell Data. *Cell*, 177(7), 1888-1902.e21.  
1716 <https://doi.org/10.1016/j.cell.2019.05.031>
- 1717 Szczesnik, T., Ho, J. W. K., & Sherwood, R. (2019). Dam mutants provide improved sensitivity and spatial  
1718 resolution for profiling transcription factor binding. *Epigenetics and Chromatin*, 12(1), 1–11.  
1719 <https://doi.org/10.1186/s13072-019-0273-x>
- 1720 Tjalsma, S. J. D., Hori, M., Sato, Y., Bousard, A., Ohi, A., Raposo, A. C., Roensch, J., le Saux, A., Nogami, J., Maehara,  
1721 K., Kujirai, T., Handa, T., Bagés-Arnal, S., Ohkawa, Y., Kurumizaka, H., da Rocha, S. T., Żylicz, J. J., Kimura,  
1722 H., & Heard, E. (2021). H4K20me1 and H3K27me3 are concurrently loaded onto the inactive X  
1723 chromosome but dispensable for inducing gene silencing. *EMBO Reports*, 22(3), 1–17.  
1724 <https://doi.org/10.15252/embr.202051989>
- 1725 van de Sande, B., Flerin, C., Davie, K., de Waegeneer, M., Hulselmans, G., Aibar, S., Seurinck, R., Saelens, W.,  
1726 Cannoodt, R., Rouchon, Q., Verbeiren, T., de Maeyer, D., Reumers, J., Saeys, Y., & Aerts, S. (2020). A  
1727 scalable SCENIC workflow for single-cell gene regulatory network analysis. *Nature Protocols*, 15(7), 2247–  
1728 2276. <https://doi.org/10.1038/s41596-020-0336-2>
- 1729 Vermeulen, M., Mulder, K. W., Denissov, S., Pijnappel, W. W. M. P., van Schaik, F. M. A., Varier, R. A., Baltissen,  
1730 M. P. A., Stunnenberg, H. G., Mann, M., & Timmers, H. T. M. (2007). Selective Anchoring of TFIID to  
1731 Nucleosomes by Trimethylation of Histone H3 Lysine 4. *Cell*, 131(1), 58–69.  
1732 <https://doi.org/10.1016/J.CELL.2007.08.016>
- 1733 Villaseñor, R., Pfaendler, R., Ambrosi, C., Butz, S., Giuliani, S., Bryan, E., Sheahan, T. W., Gable, A. L., Schmolka,  
1734 N., Manzo, M., Wirz, J., Feller, C., von Mering, C., Aebersold, R., Voigt, P., & Baubec, T. (2020). ChromID  
1735 identifies the protein interactome at chromatin marks. *Nature Biotechnology*.  
1736 <https://doi.org/10.1038/s41587-020-0434-2>
- 1737 Vogel, M. J., Peric-Hupkes, D., & van Steensel, B. (2007). Detection of in vivo protein - DNA interactions using  
1738 DamID in mammalian cells. *Nature Protocols*, 2(6), 1467–1478. <https://doi.org/10.1038/nprot.2007.148>
- 1739 Wang, C., Liu, X., Gao, Y., Yang, L., Li, C., Liu, W., Chen, C., Kou, X., Zhao, Y., Chen, J., Wang, Y., Le, R., Wang, H.,  
1740 Duan, T., Zhang, Y., & Gao, S. (2018). Reprogramming of H3K9me3-dependent heterochromatin during  
1741 mammalian embryo development. *Nature Cell Biology*, 20(5), 620–631. <https://doi.org/10.1038/s41556-018-0093-4>
- 1743 Wang, H., Wang, L., Erdjument-Bromage, H., Vidal, M., Tempst, P., Jones, R. S., & Zhang, Y. (2004). Role of histone  
1744 H2A ubiquitination in Polycomb silencing. *Nature* 2004 431:7010, 431(7010), 873–878.  
1745 <https://doi.org/10.1038/NATURE02985>
- 1746 WESTERFIELD, & M. (2000). The Zebrafish Book: A Guide for the Laboratory Use of Zebrafish.  
1747 [http://zfin.org/Zf\\_info/Zfbook/Zfbk.html](http://zfin.org/Zf_info/Zfbook/Zfbk.html). <http://ci.nii.ac.jp/naid/10029409142/en/>



- 1748 Wong, X., Cutler, J. A., Hoskins, V. E., Gordon, M., Madugundu, A. K., Pandey, A., & Reddy, K. L. (2021). Mapping  
1749 the micro-proteome of the nuclear lamina and lamina-associated domains. *Life Science Alliance*, 4(5).  
1750 <https://doi.org/10.26508/LSA.202000774>
- 1751 Xiong, H., Luo, Y., Wang, Q., Yu, X., & He, A. (2021). Single-cell joint detection of chromatin occupancy and  
1752 transcriptome enables higher-dimensional epigenomic reconstructions. *Nature Methods*, 18(6), 652–660.  
1753 <https://doi.org/10.1038/s41592-021-01129-z>
- 1754 Zeller, P., Yeung, J., Barbanson, B. A. de, Gaza, H. V., Florescu, M., & Oudenaarden, A. van. (2021). Hierarchical  
1755 chromatin regulation during blood formation uncovered by single-cell sortChIC. *BioRxiv*,  
1756 2021.04.26.440606. <https://doi.org/10.1101/2021.04.26.440606>
- 1757 Zeng, H., Horie, K., Madisen, L., Pavlova, M. N., Gragerova, G., Rohde, A. D., Schimpf, B. A., Liang, Y., Ojala, E.,  
1758 Kramer, F., Roth, P., Slobodskaya, O., Dolka, I., Southon, E. A., Tessarollo, L., Bornfeldt, K. E., Gragerov, A.,  
1759 Pavlakis, G. N., & Gaitanaris, G. A. (2008). An Inducible and Reversible Mouse Genetic Rescue System. *PLOS*  
1760 *Genetics*, 4(5), e1000069. <https://doi.org/10.1371/JOURNAL.PGEN.1000069>
- 1761 Zhu, C., Yu, M., Huang, H., Juric, I., Abnousi, A., Hu, R., Lucero, J., Behrens, M. M., Hu, M., & Ren, B. (2019). An  
1762 ultra high-throughput method for single-cell joint analysis of open chromatin and transcriptome. *Nature*  
1763 *Structural and Molecular Biology*, 26(11), 1063–1070. <https://doi.org/10.1038/s41594-019-0323-x>
- 1764 Zhu, C., Zhang, Y., Li, Y. E., Lucero, J., Behrens, M. M., & Ren, B. (2021). Joint profiling of histone modifications  
1765 and transcriptome in single cells from mouse brain. *Nature Methods*, 18(3), 283–292.  
1766 <https://doi.org/10.1038/s41592-021-01060-3>
- 1767

**Figure 1**

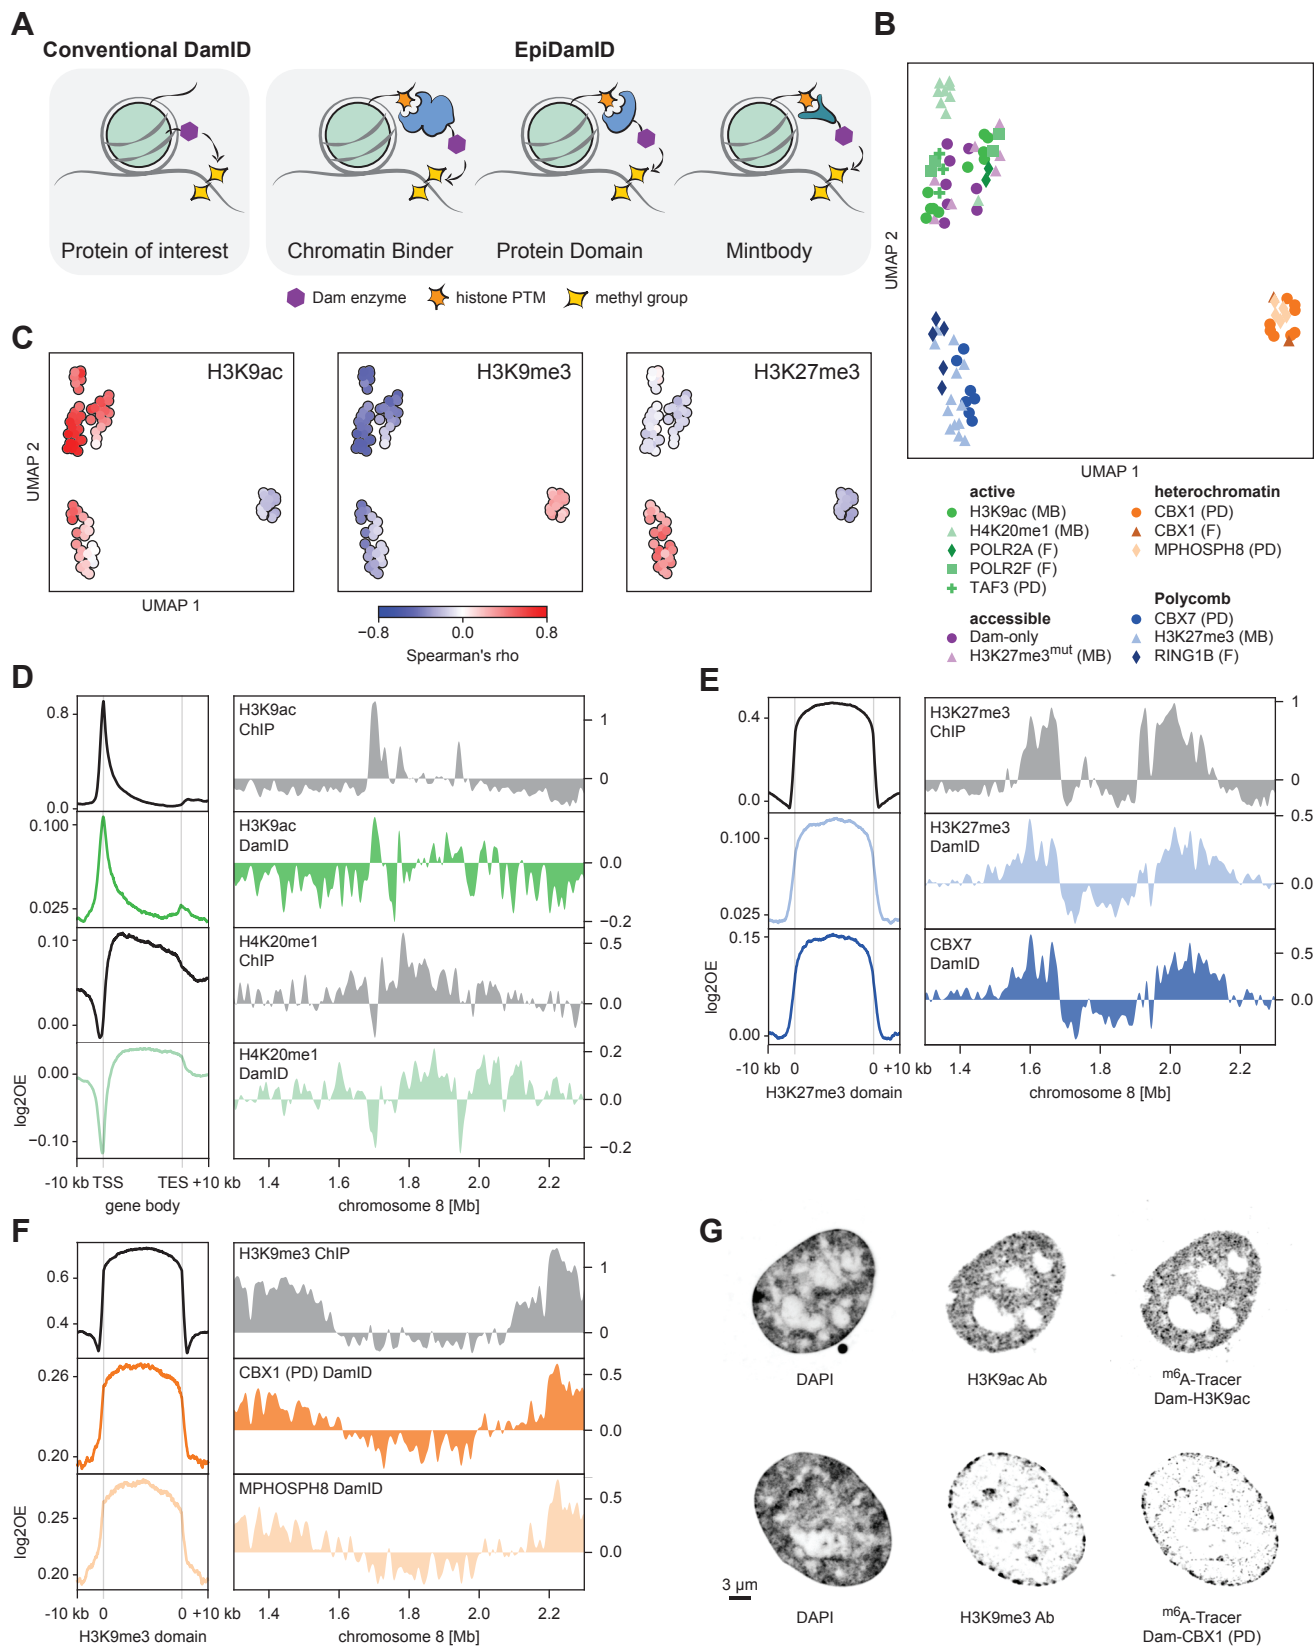

**Figure 2**

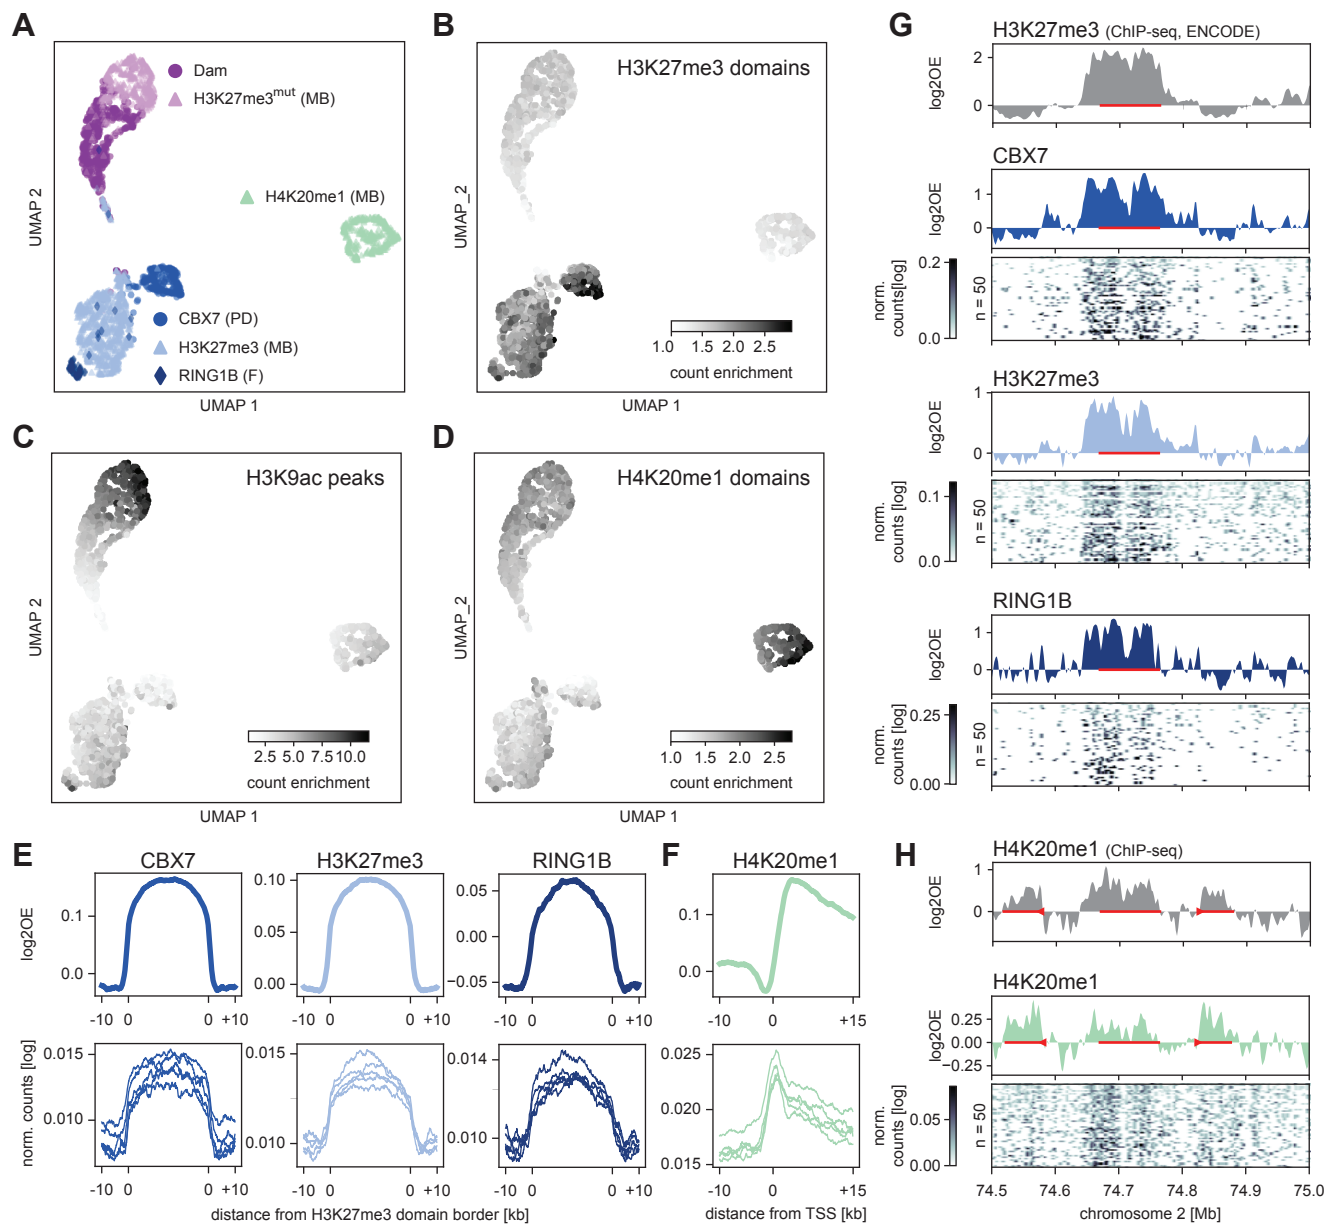

Figure 3

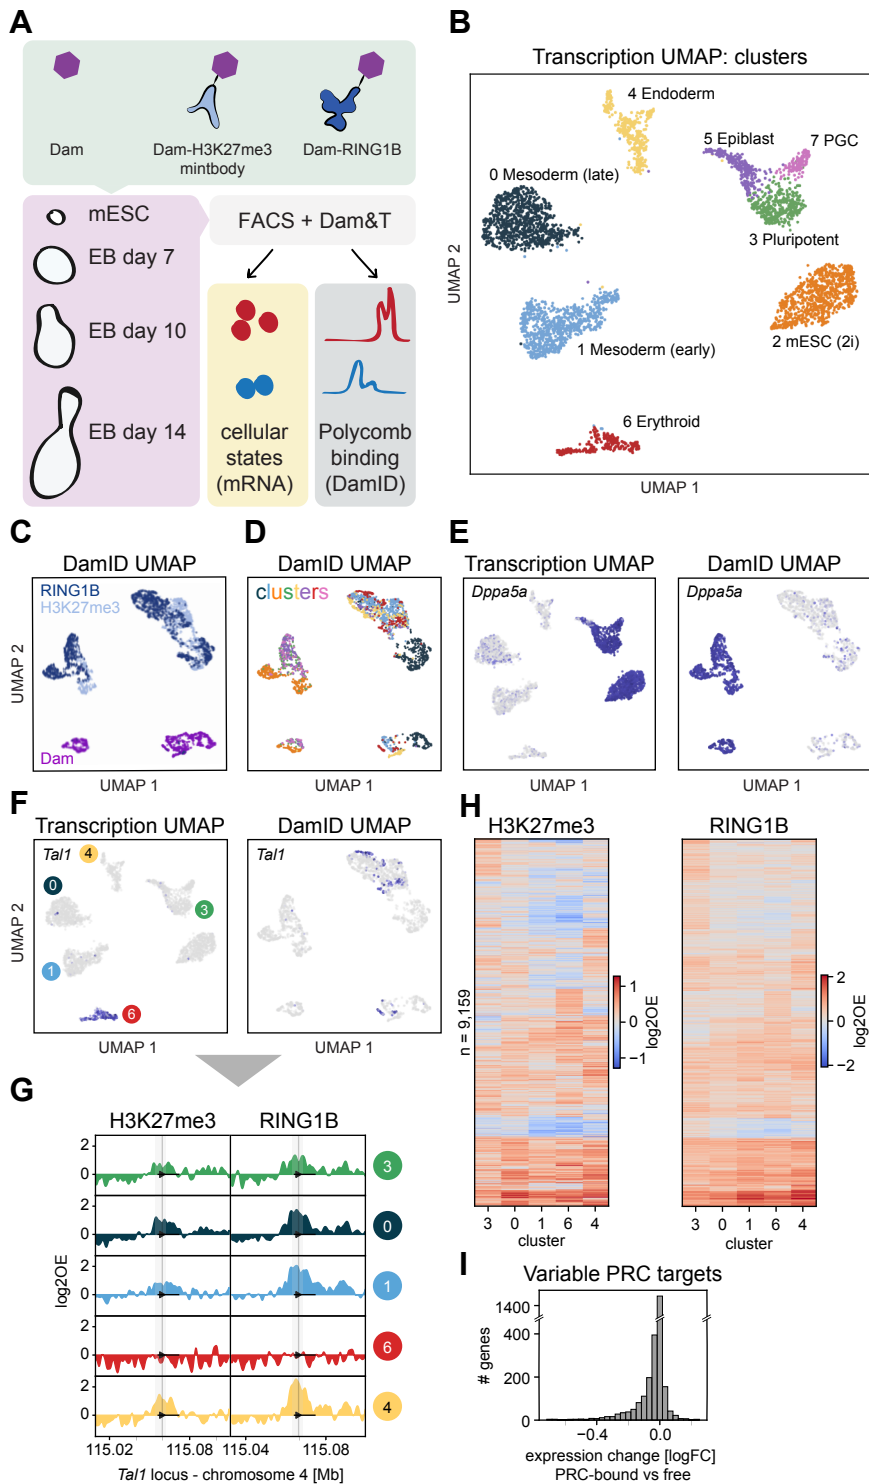

**Figure 4**

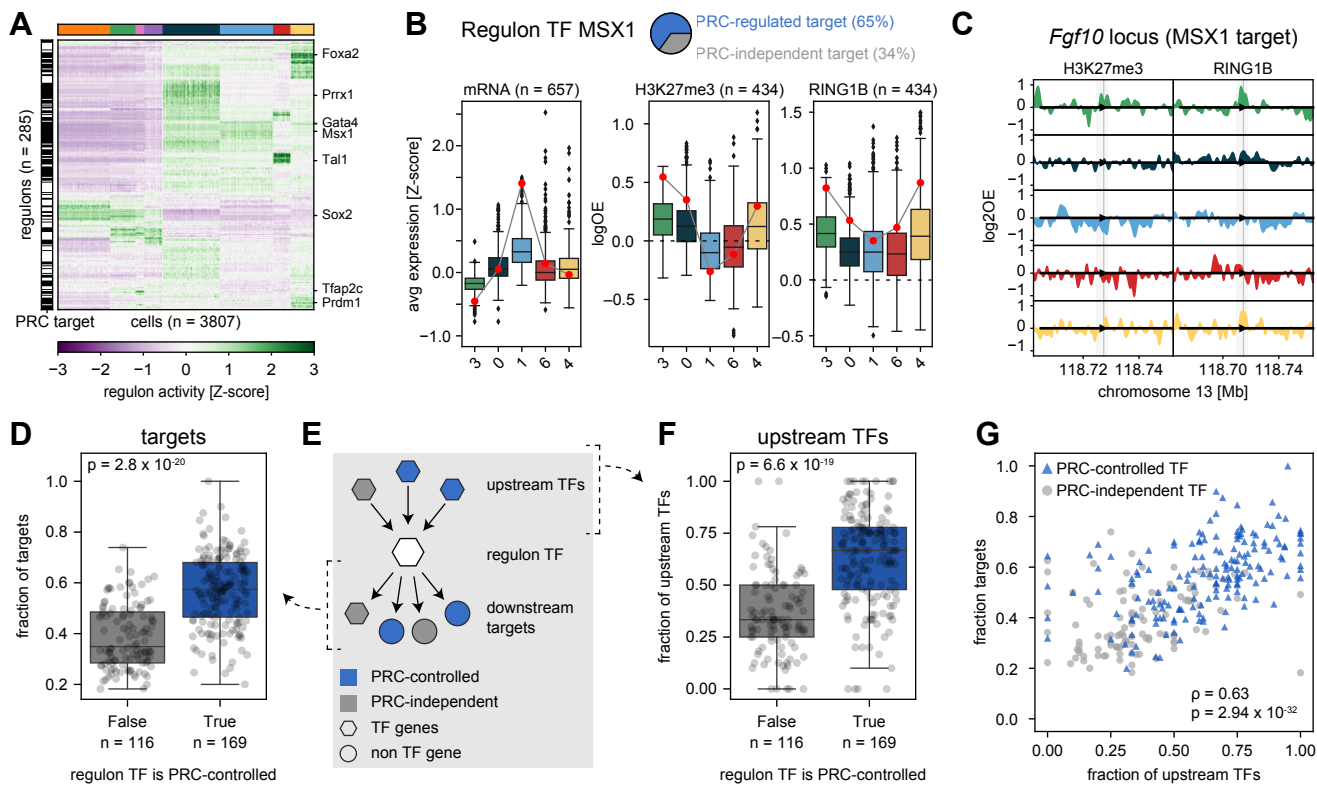

**Figure 5**

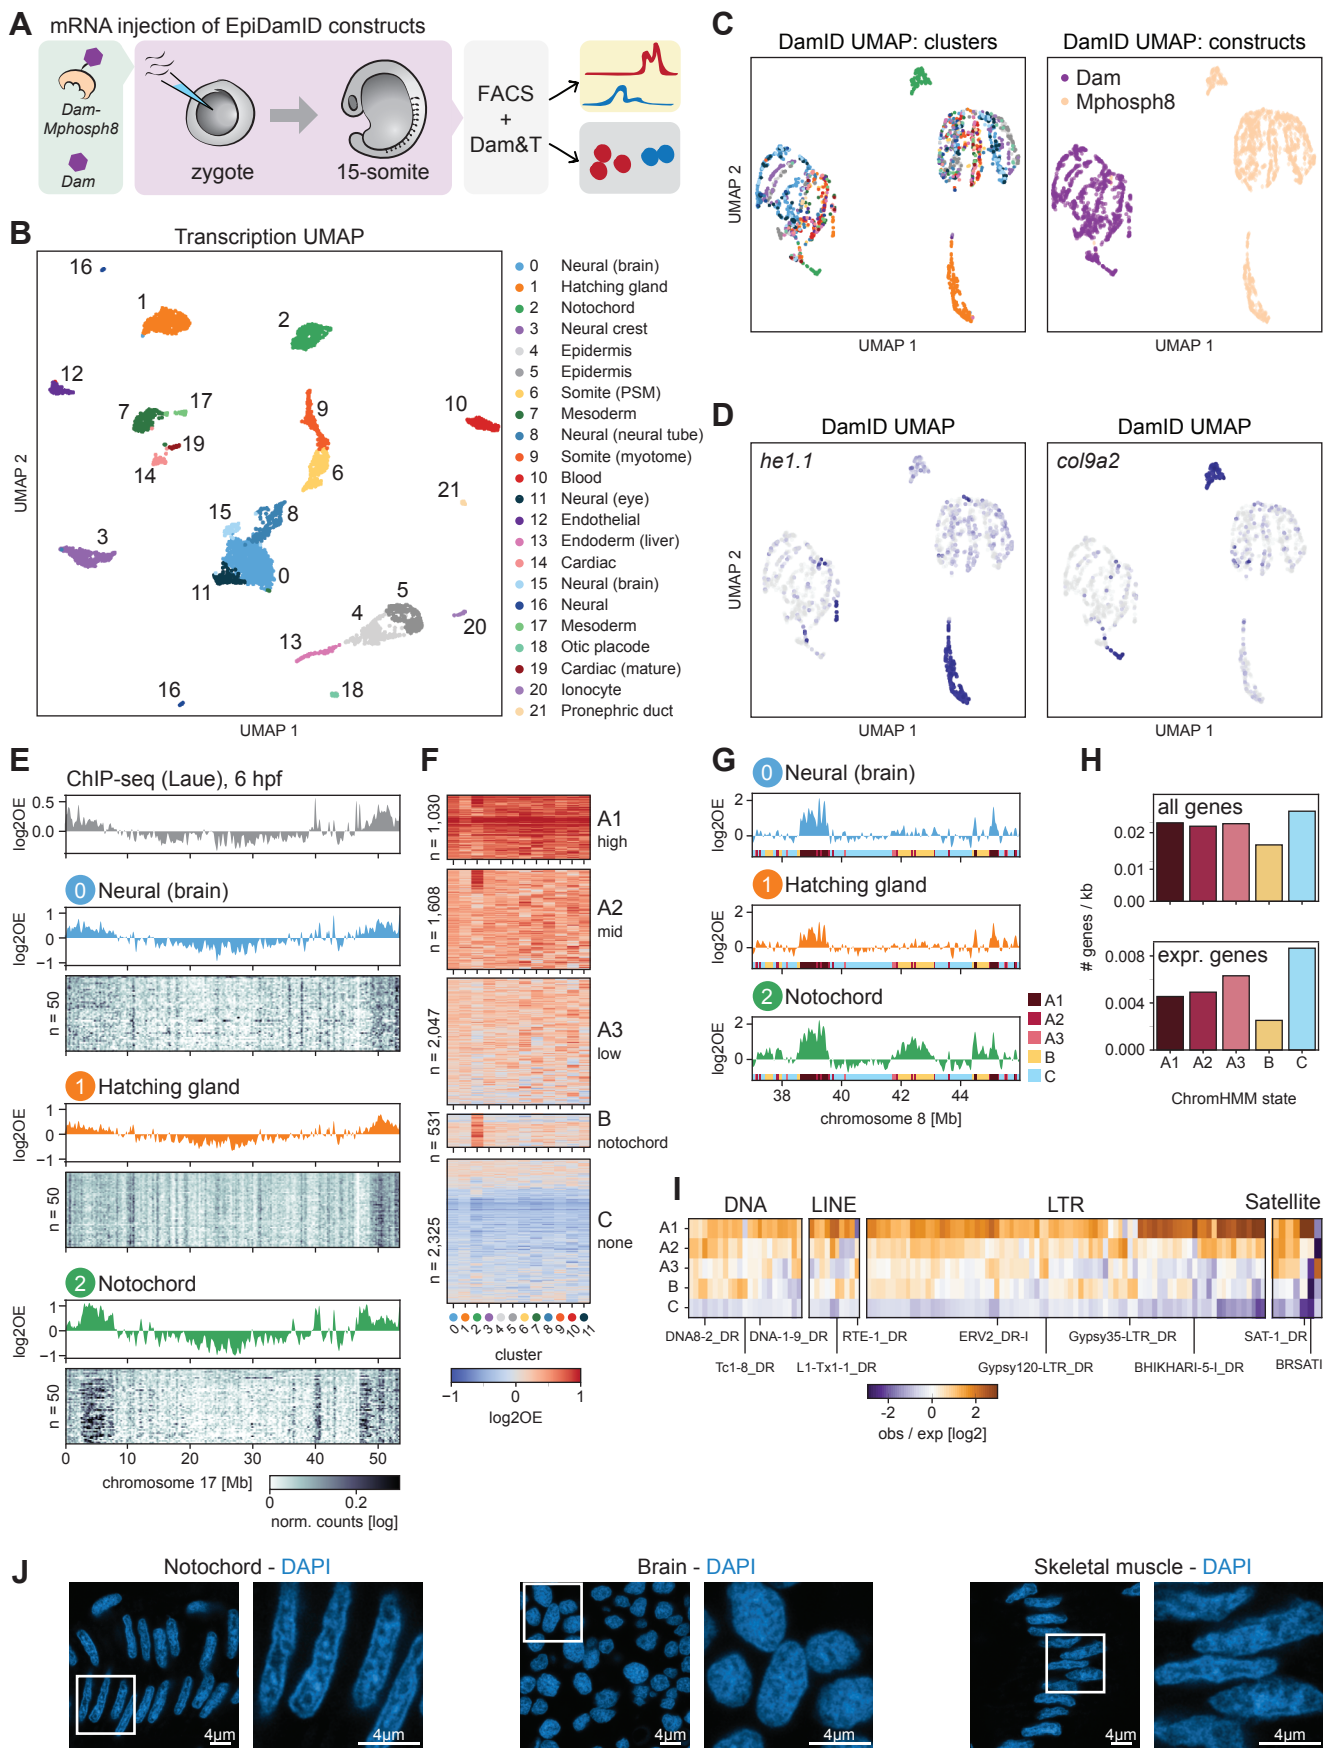

# Supplementary Figure 1

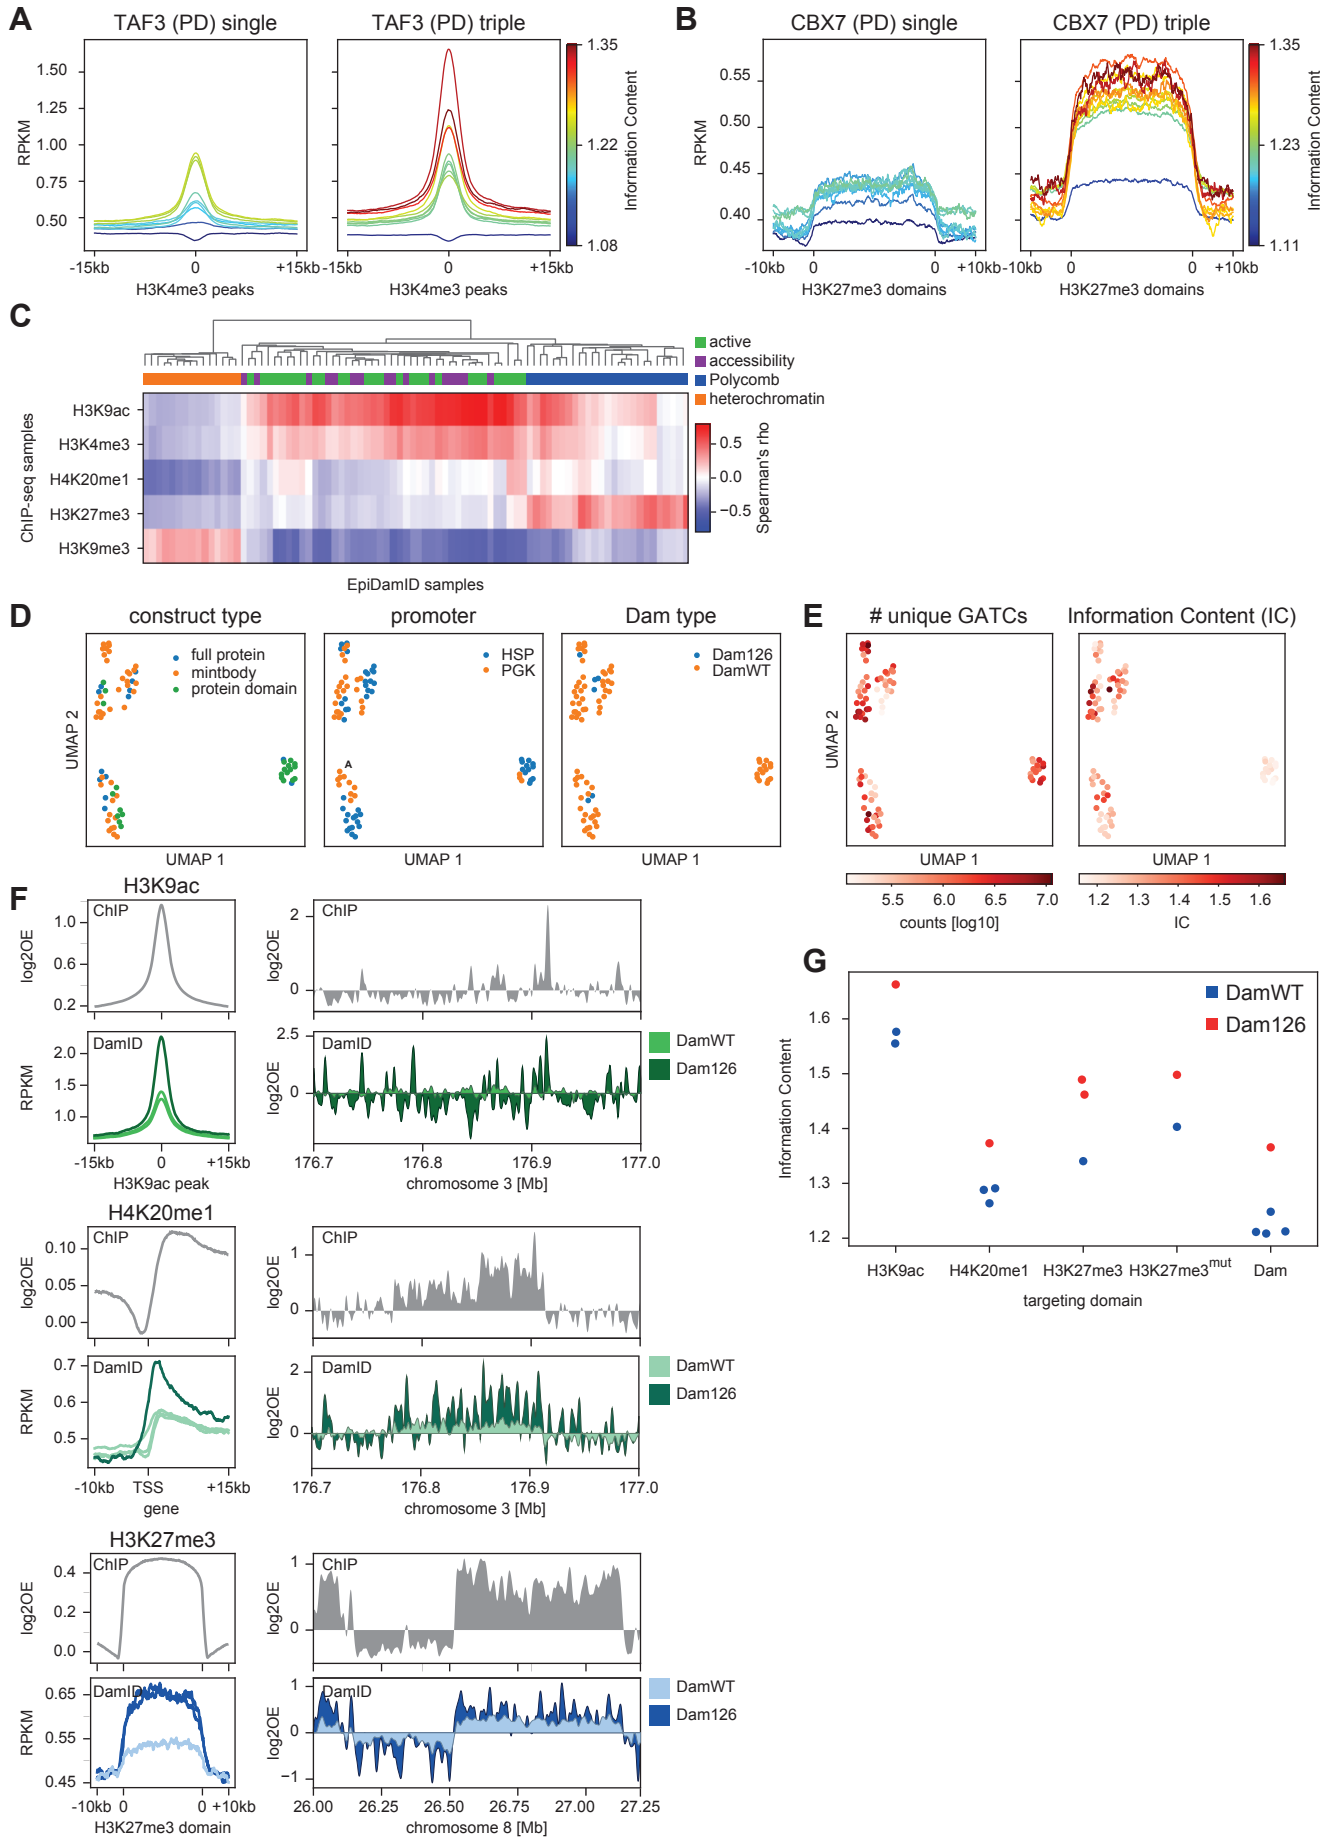

# Supplementary Figure 2

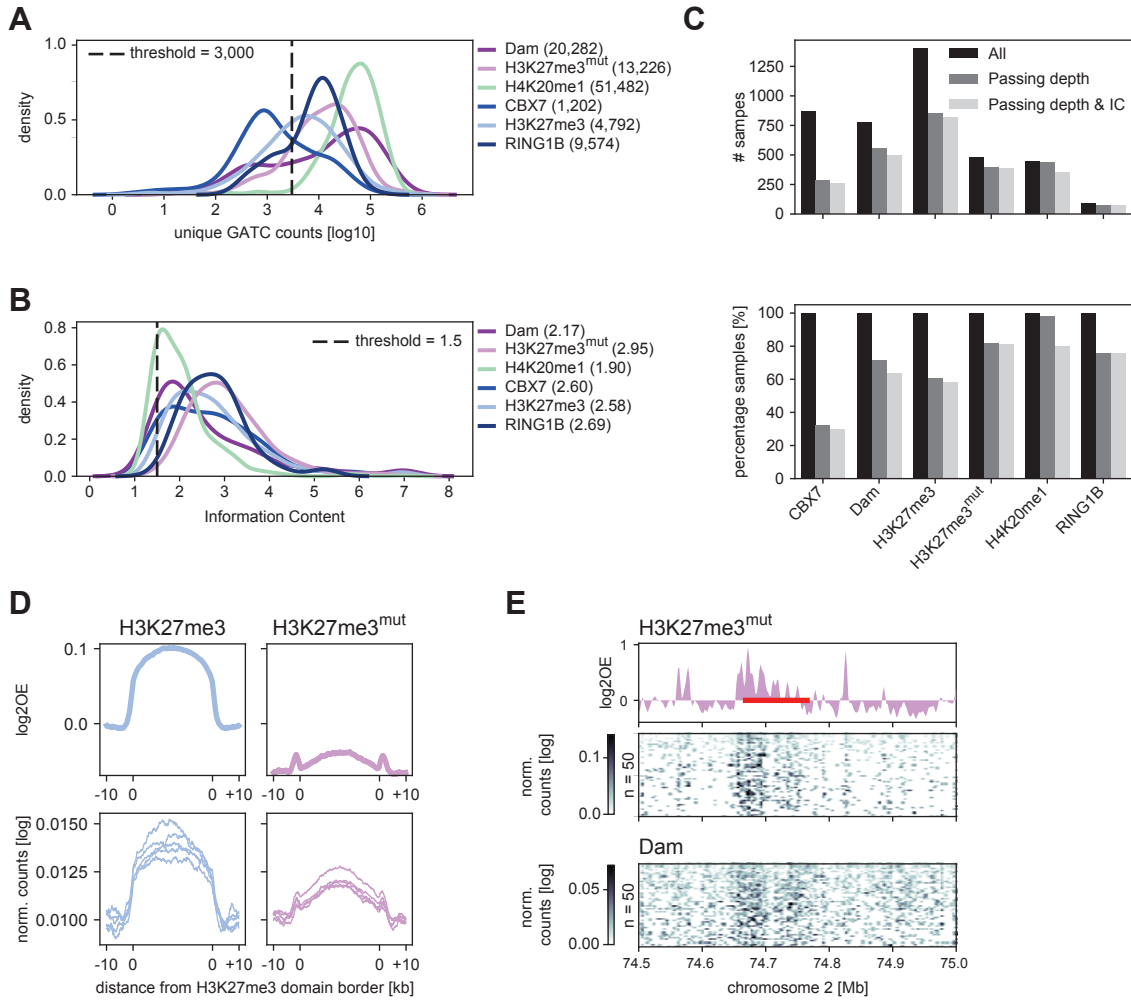



# Supplementary Figure 3

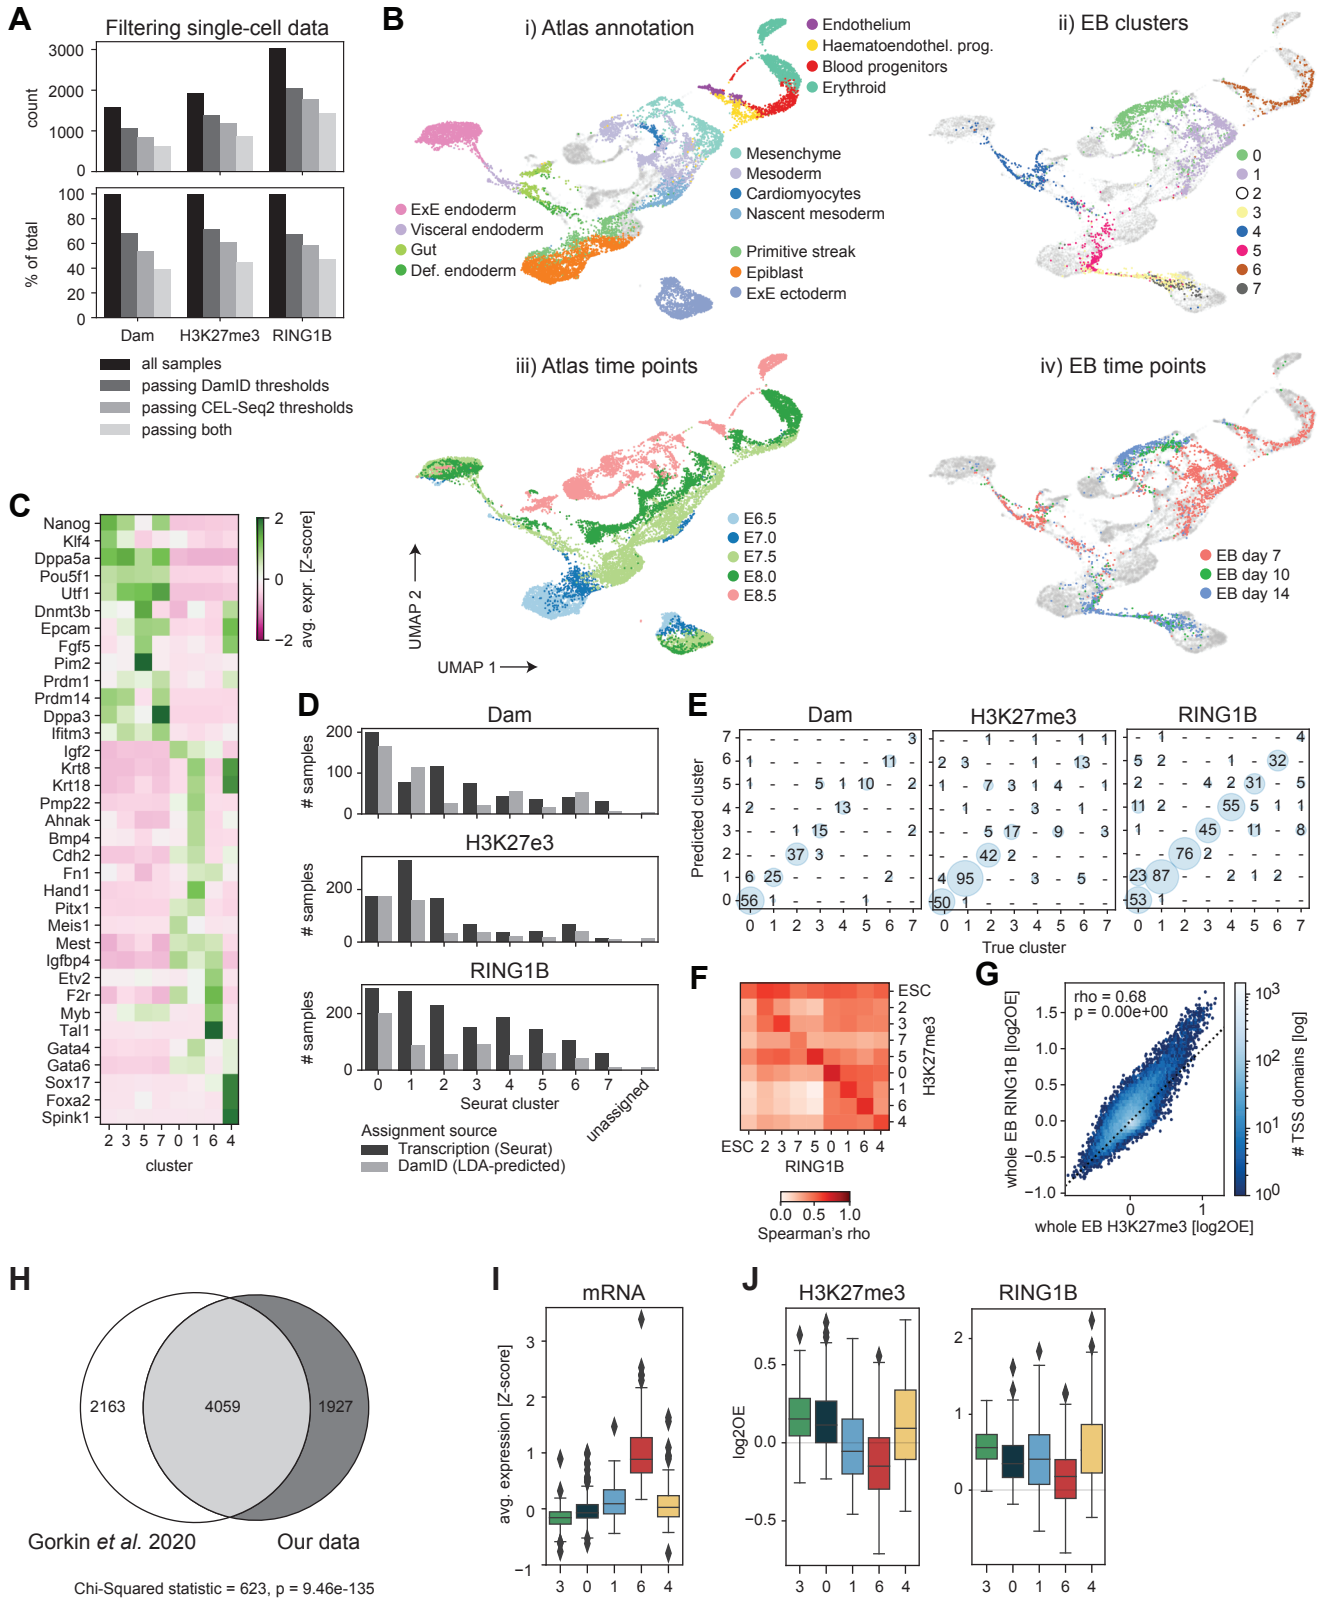

# Supplementary Figure 4

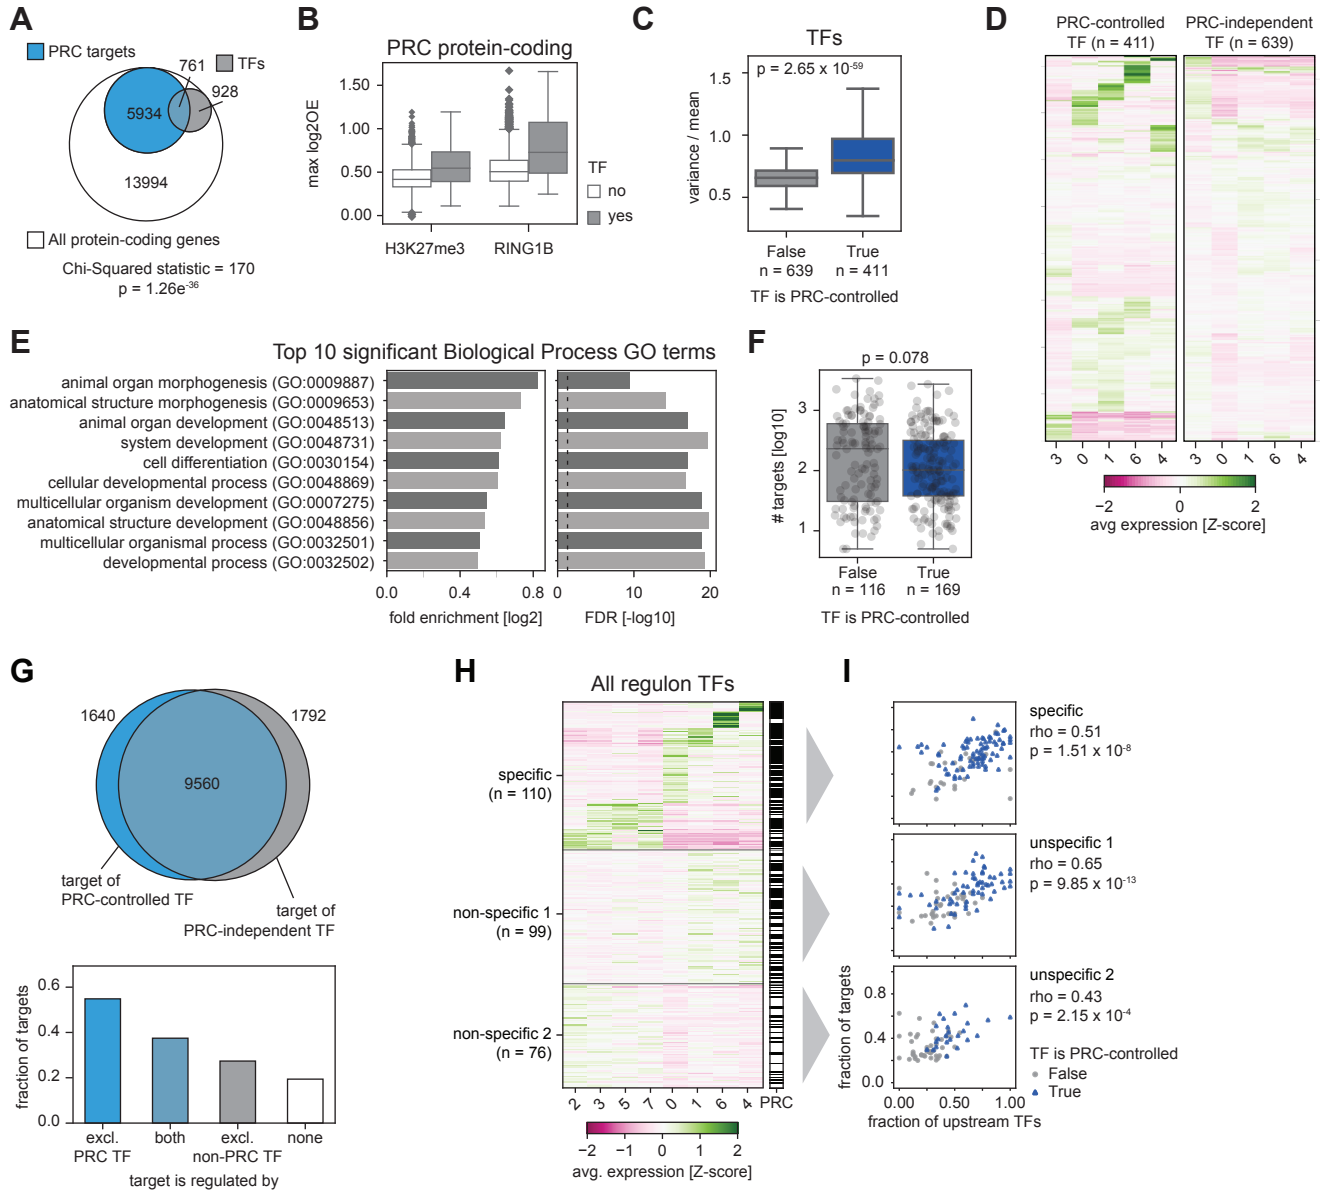

# Supplementary Figure 5.1

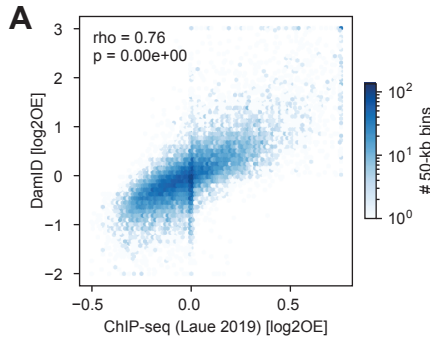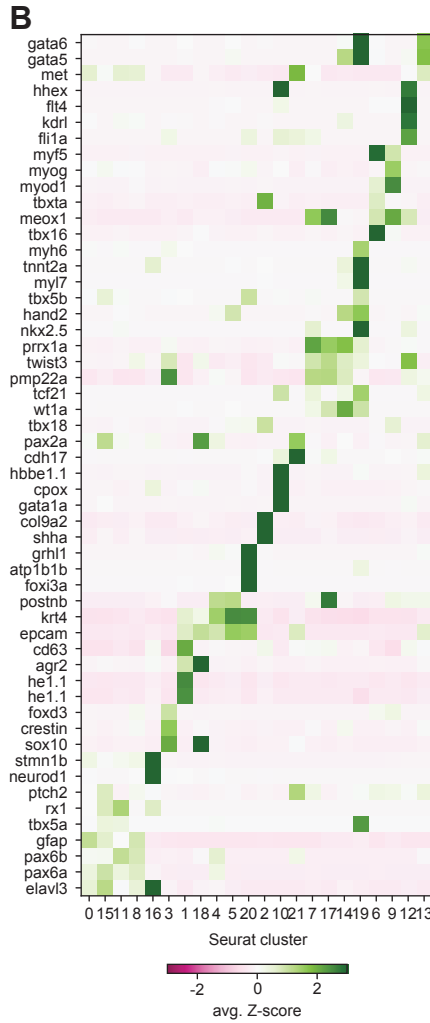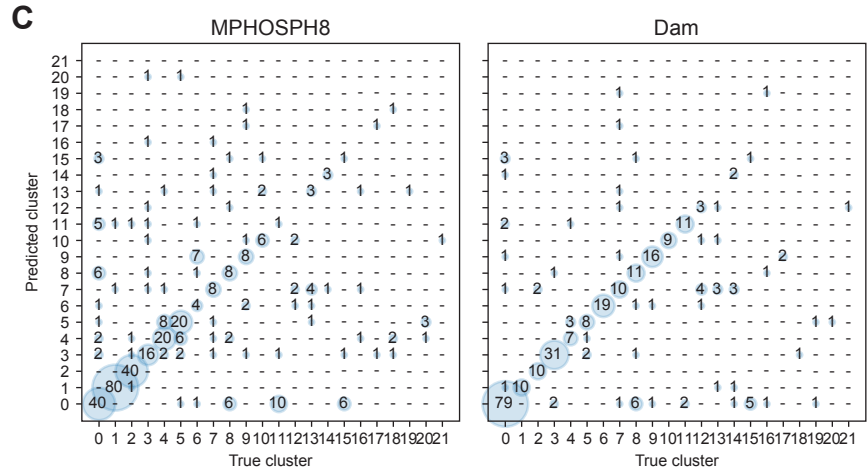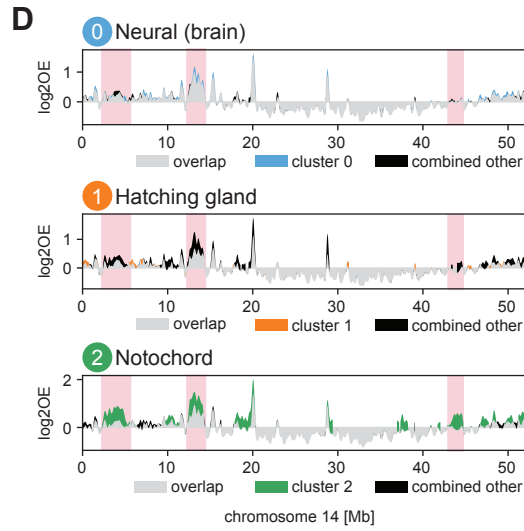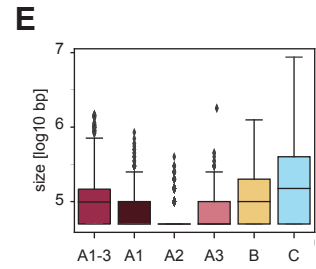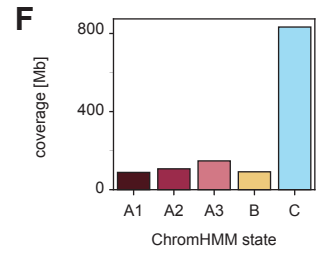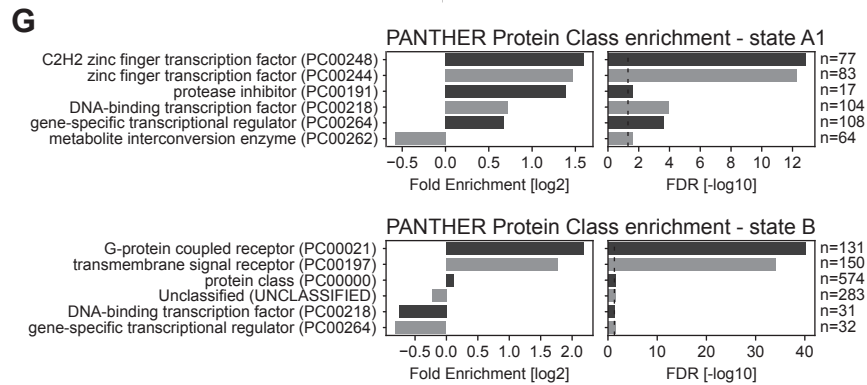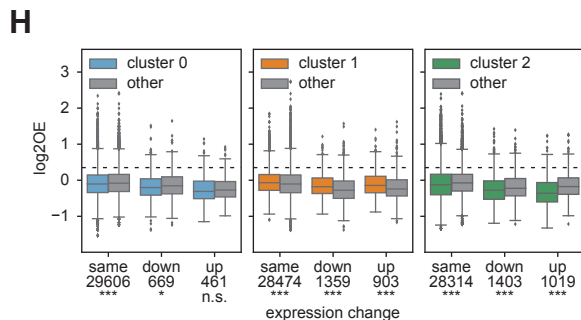

# Supplementary Figure 5.2

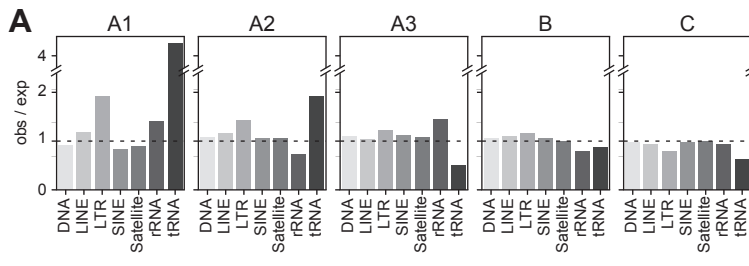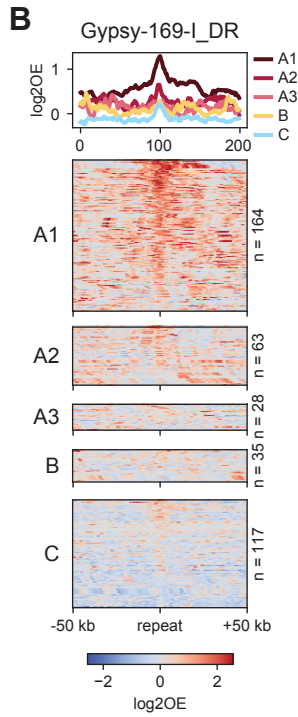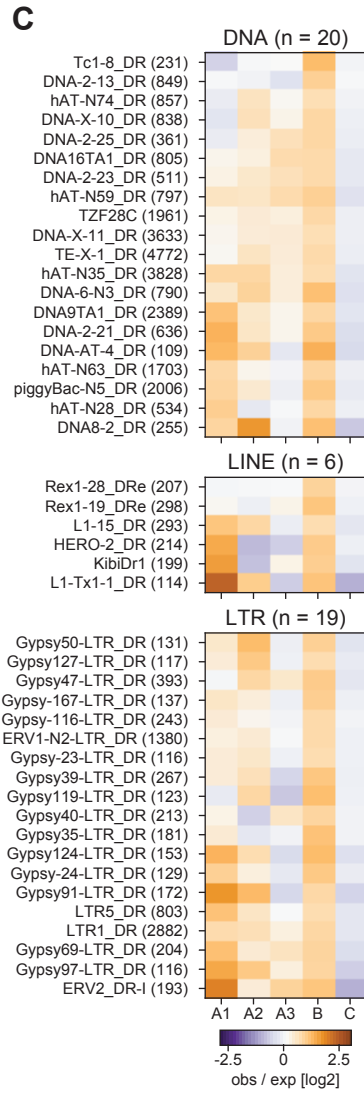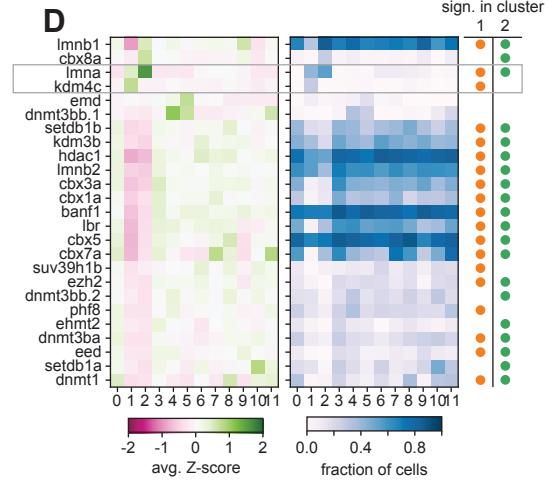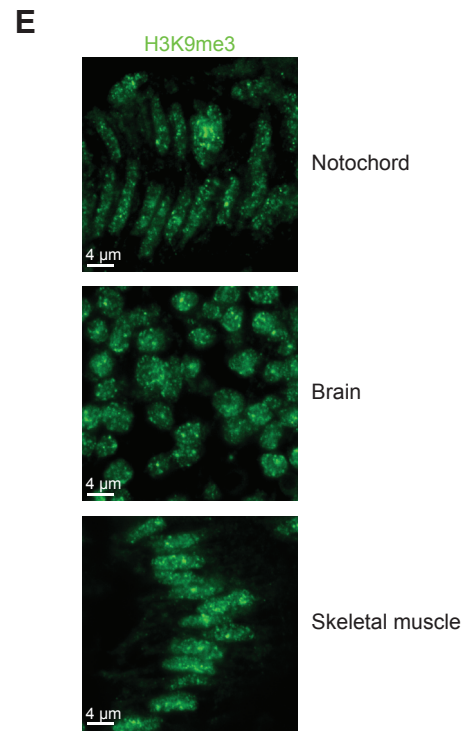

Source: https://www.biorxiv.org/content/biorxiv/early/2021/10/28/2021.10.26.465688.full.pdf
